# Supplementary material
Source: PubMed Central journal article supplement (PMC4353010)

# Torquoselective Ring-Opening of Fused Cyclobutenamides: Evidence for a *Cis,Trans*-Cyclooctadienone Intermediate

Xiao-Na Wang,<sup>†</sup> Elizabeth H. Krenske,<sup>\*,‡</sup> Ryne C. Johnston,<sup>‡,§</sup>  
K. N. Houk,<sup>\*,¶</sup> and Richard P. Hsung<sup>\*,†</sup>

<sup>†</sup>Division of Pharmaceutical Sciences and Department of Chemistry, University of Wisconsin, Madison, WI 53705

<sup>‡</sup>School of Chemistry and Molecular Biosciences, The University of Queensland, Brisbane, QLD 4072, Australia

<sup>¶</sup>Department of Chemistry and Biochemistry, University of California, Los Angeles, CA 90095

## *Supporting Information Part 2*

### **Proton NMR and Selected Carbon NMR Spectra**

wxn582-2\_27Nov2013

Archive directory: /export/home/xiaona/vnmrsys/data  
Sample directory: wxn582-2\_27Nov2013

Pulse Sequence: s2pul

Solvent: CDCl3  
Temp. 25.0 C / 298.1 K  
File: PROTON  
INOVA-500 "nmr03"

Relax. delay 1.000 sec  
Pulse 45.0 degrees  
Acq. time 3.747 sec  
Width 8000.0 Hz  
8 repetitions  
OBSERVE H1, 499.7288080 MHz  
DATA PROCESSING  
Line broadening 0.5 Hz  
FT size 65536  
Total time 0 min, 38 sec

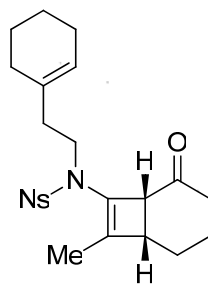

1f

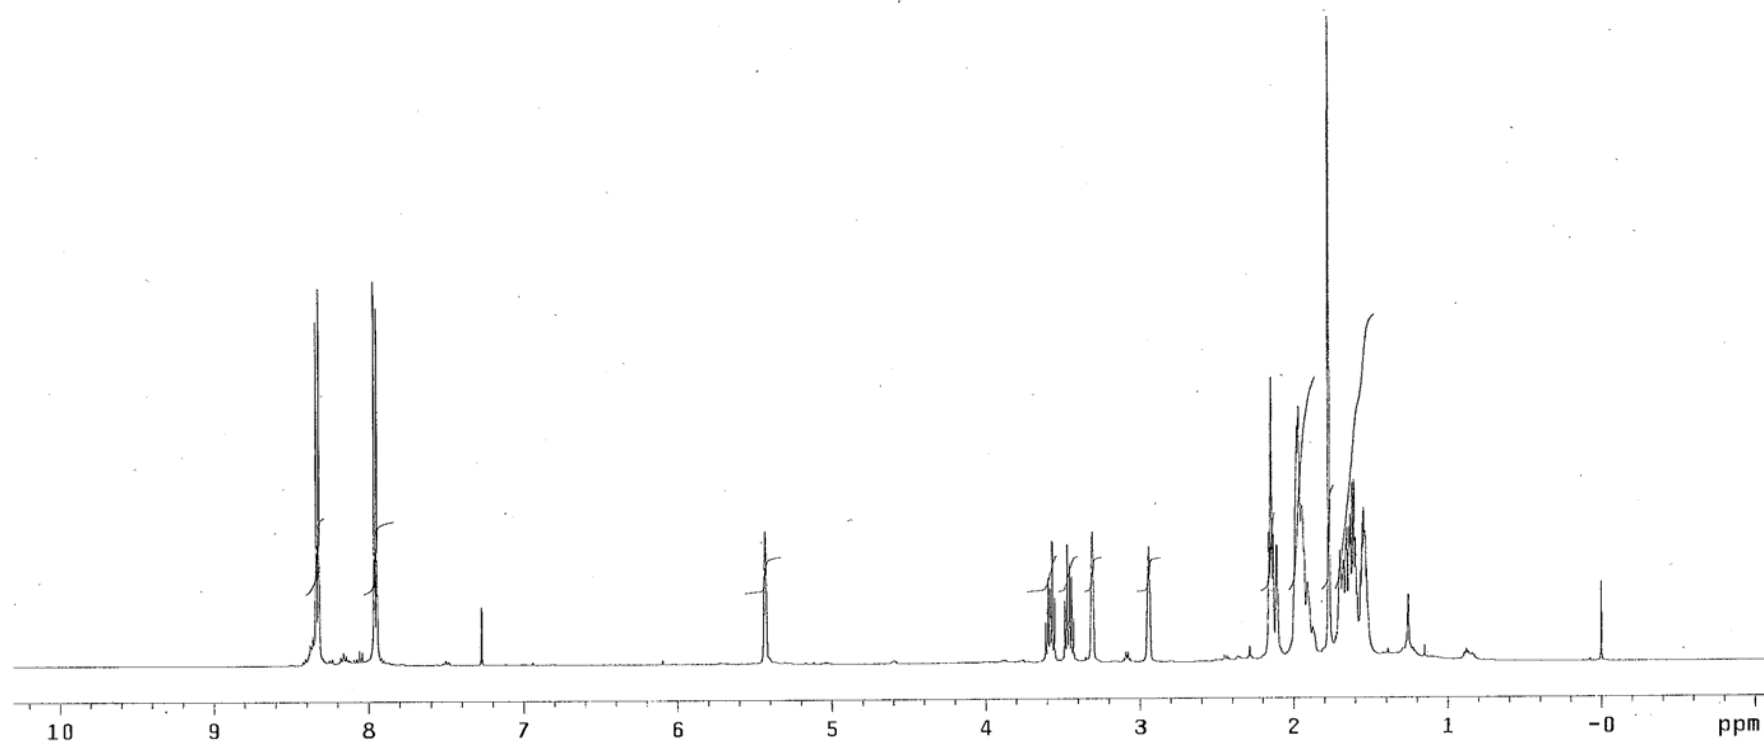

wxn538-3-2\_24Sep2013-21:03:35

Archive directory: /export/home/xiaona/vnmrsys/data  
Sample directory: wxn538-3-2\_24Sep2013-21:03:35

Pulse Sequence: s2pu1  
Solvent: CDCl3  
Temp. 25.0 C / 298.1 K  
File: CARBON  
INOVA-500 "nmr03"

Relax. delay 1.000 sec  
Pulse 45.0 degrees  
Acq. time 1.197 sec  
Width 25157.2 Hz  
1044 repetitions  
OBSERVE C13, 100.5263821 MHz  
DECOUPLE H1, 399.7885243 MHz  
Power 43 dB  
continuously on  
WALTZ-16 modulated  
DATA PROCESSING  
Line broadening 0.8 Hz  
FT size 65536  
Total time 3 hr, 3 min, 49 sec

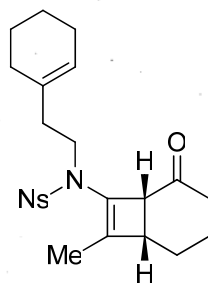

1f

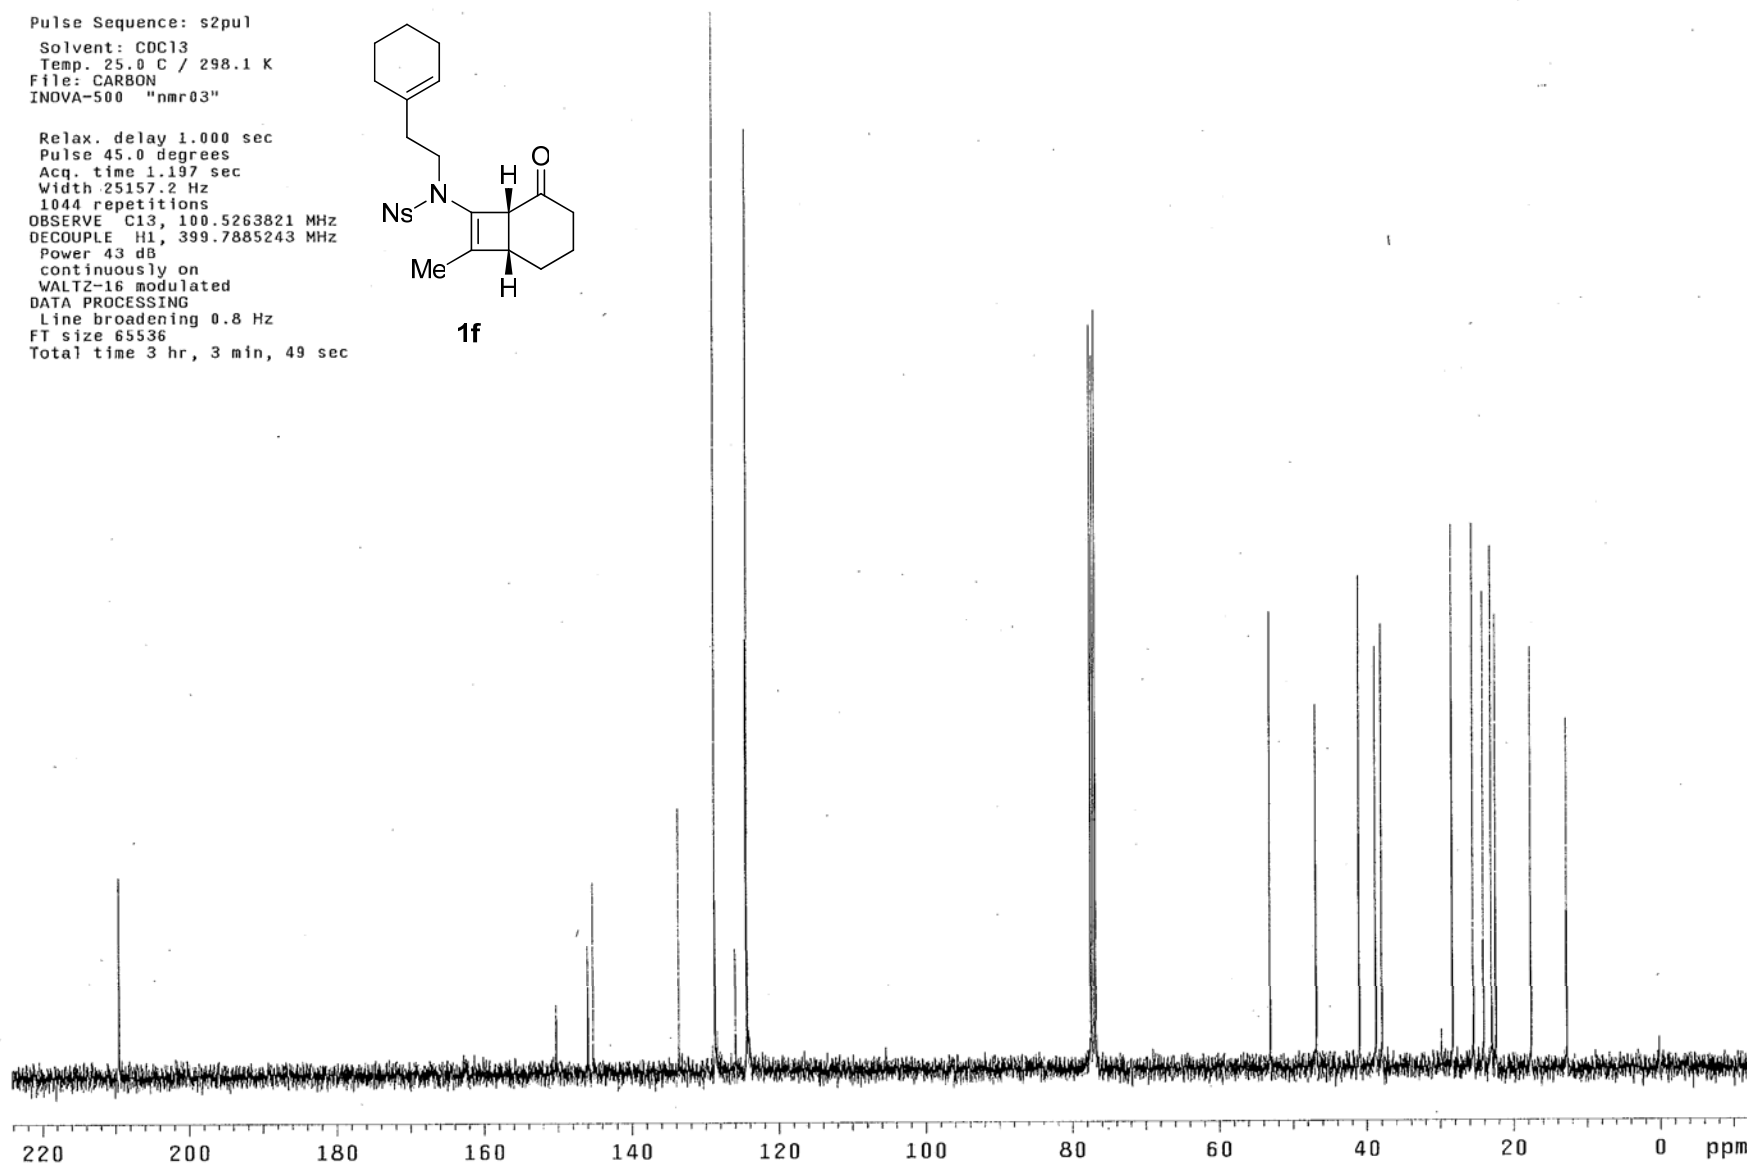

wxn595-1\_17Dec2013

Archive directory: /export/home/xiaona/vnmrsys/data  
Sample directory: wxn595-1\_17Dec2013

Pulse Sequence: s2pu1

Solvent: CDCl3  
Temp. 25.0 C / 298.1 K  
File: PROTON  
INOVA-500 "nmr03"

Relax. delay 1.000 sec  
Pulse 45.0 degrees  
Acq. time 3.754 sec  
Width 6387.7 Hz  
8 repetitions  
OBSERVE H1, 399.7865124 MHz  
DATA PROCESSING  
F1 size 65536  
Total time 0 min, 57 sec

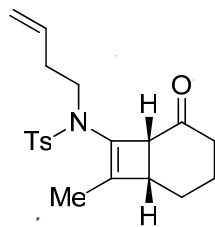

1g

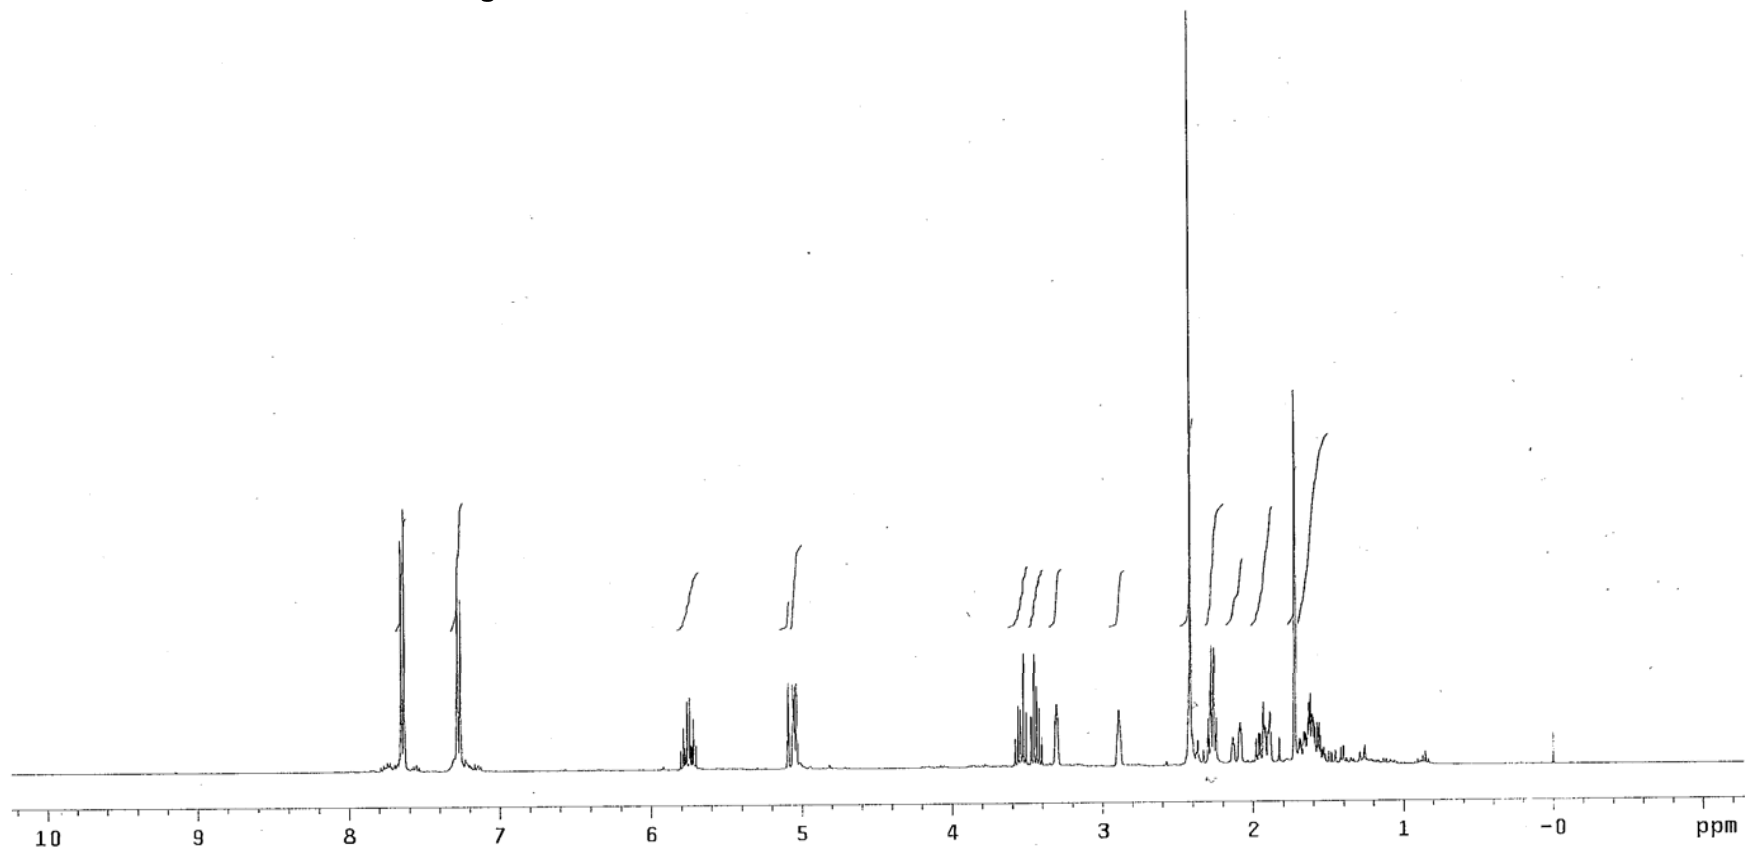

wxn595-1\_17Dec2013

Archive directory: /export/home/xiaona/vnmrsys/data  
Sample directory: wxn595-1\_17Dec2013

Pulse Sequence: s2pul

Solvent: CDCl3  
Temp. 25.0 C / 298.1 K  
File: CARBON  
INOVA-500 "nmr03"

Relax. delay 1.000 sec  
Pulse 45.0 degrees  
Acq. time 1.197 sec  
Width 25157.2 Hz  
212 repetitions  
OBSERVE C13, 100.5263913 MHz  
DECOUPLE H1, 399.7885243 MHz  
Power 43 dB  
continuously on  
WALTZ-16 modulated  
DATA PROCESSING  
Line broadening 0.8 Hz  
FT size 65536  
Total time 3 hr, 3 min, 49 sec

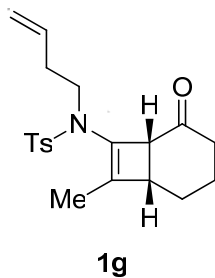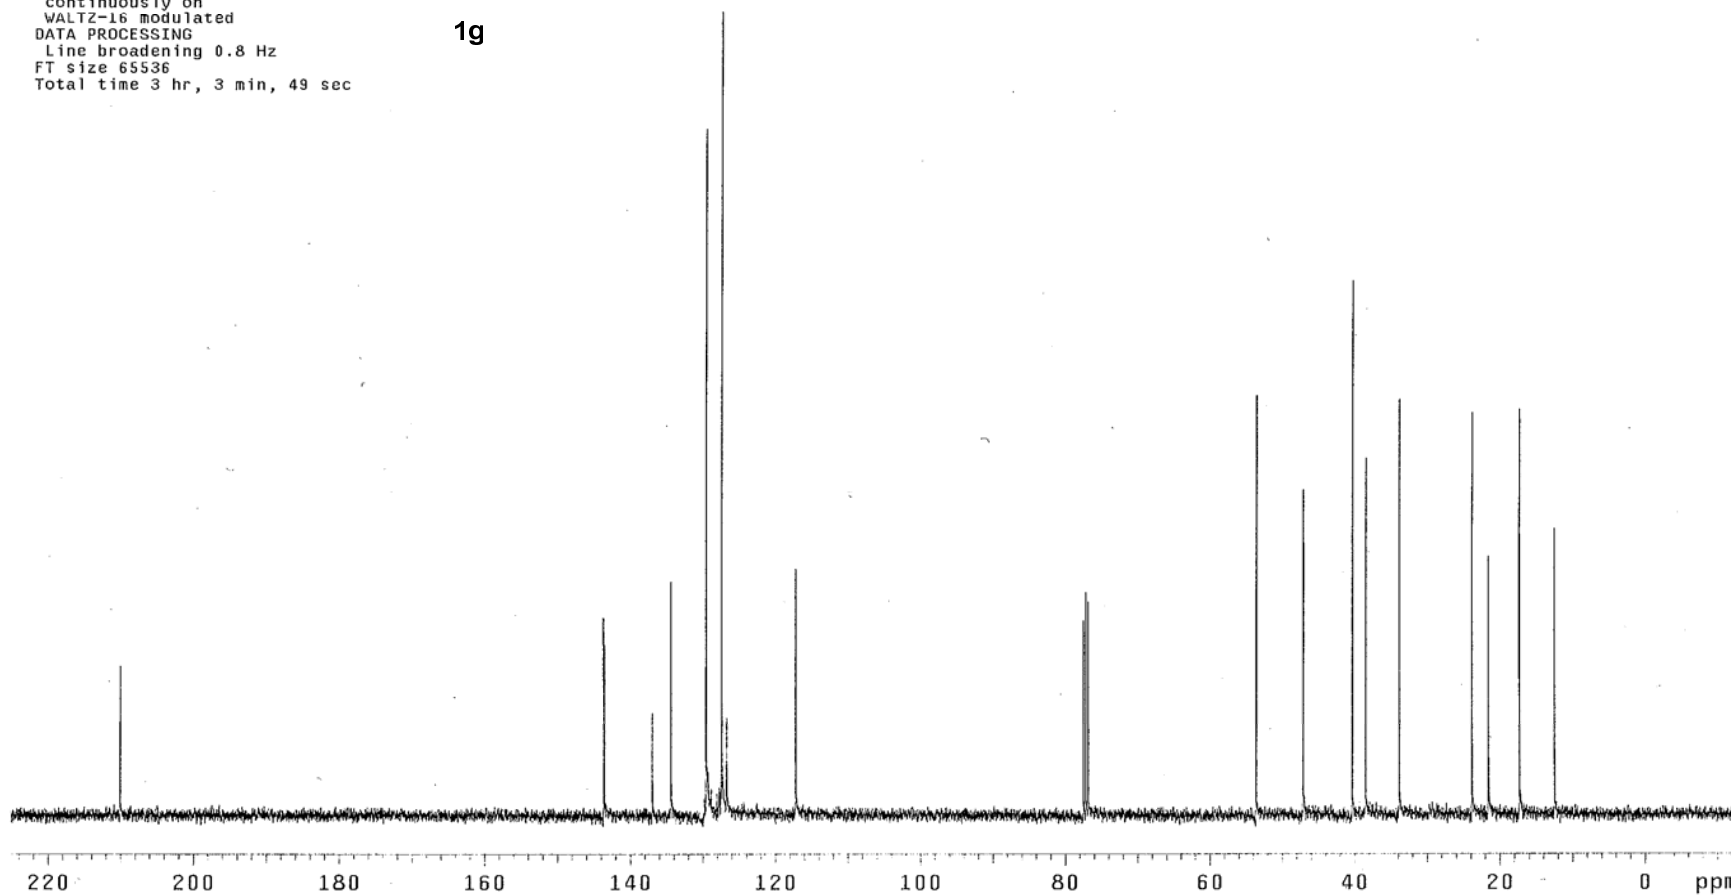

wxn590-1\_13Dec2013-14:49:02

Archive directory: /export/home/xiaona/vnmrsys/data  
Sample directory: wxn590-1\_13Dec2013-14:49:02

Pulse Sequence: s2pul  
Solvent: CDCl3  
Temp. 25.0 C / 298.1 K  
File: PROTON  
INOVA-500 "nmr03"

Relax. delay 1.000 sec  
Pulse 45.0 degrees  
Acq. time 3.754 sec  
Width 6387.7 Hz  
8 repetitions  
OBSERVE H1, 399.7865179 MHz  
DATA PROCESSING  
FT size 65536  
Total time 0 min, 57 sec

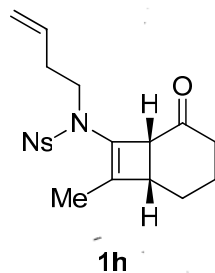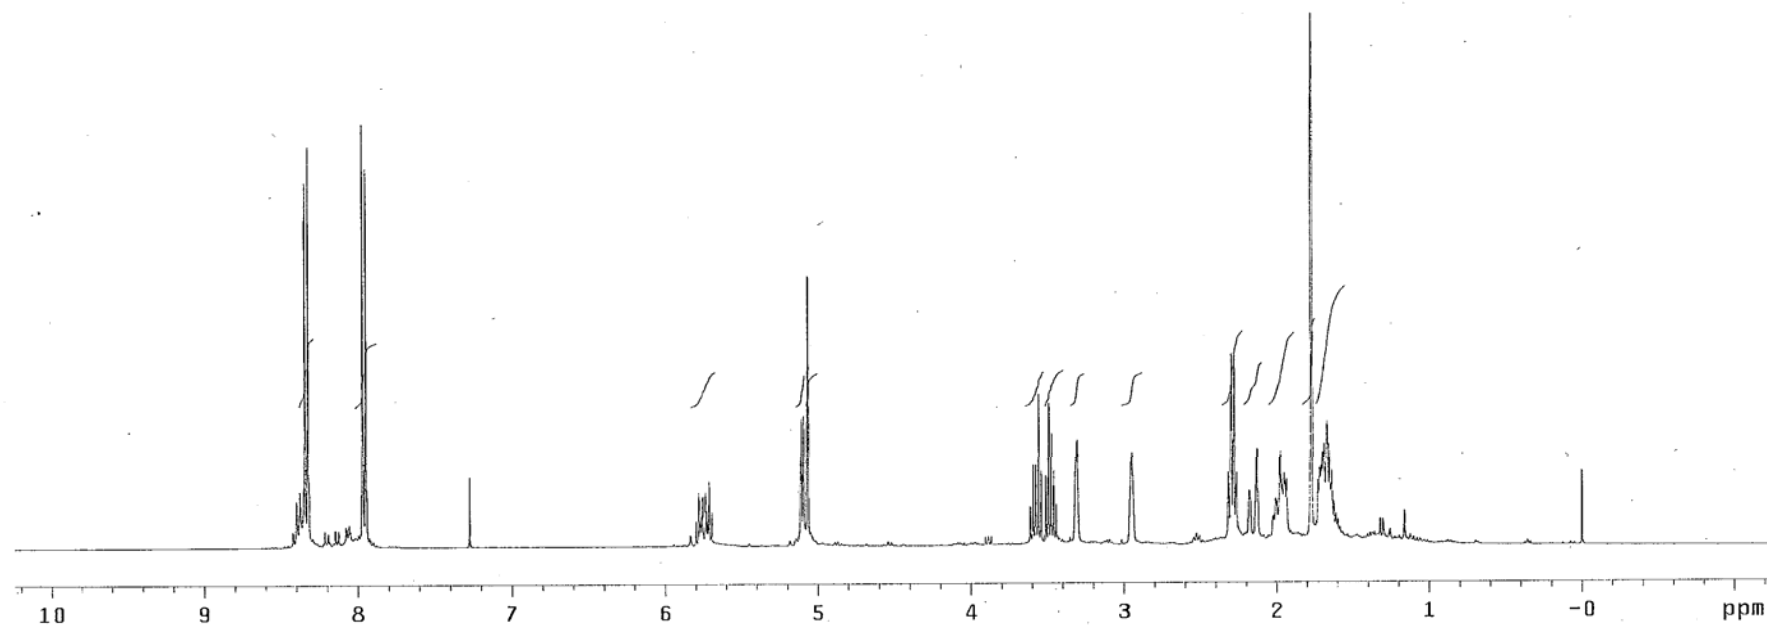

wxn590-1\_13Dec2013-13:14:14

Archive directory: /export/home/xiaona/vnmrsys/data  
Sample directory: wxn590-1\_13Dec2013-13:14:14

Pulse Sequence: s2pul

Solvent: CDCl3  
Temp. 25.0 C / 298.1 K  
File: CARBON  
INOVA-500 "nmr03"

Relax. delay 1.000 sec  
Pulse 45.0 degrees  
Acq. time 1.197 sec  
Width 25157.2 Hz  
370 repetitions  
OBSERVE C13, 100.5263852 MHz  
DECOUPLE H1, 399.7885243 MHz  
Power 43 dB  
continuously on  
WALTZ-16 modulated  
DATA PROCESSING  
Line broadening 0.8 Hz  
FT size 65536  
Total time 3 hr, 3 min, 49 sec

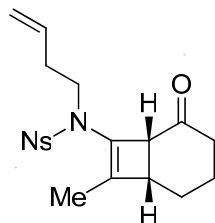

1h

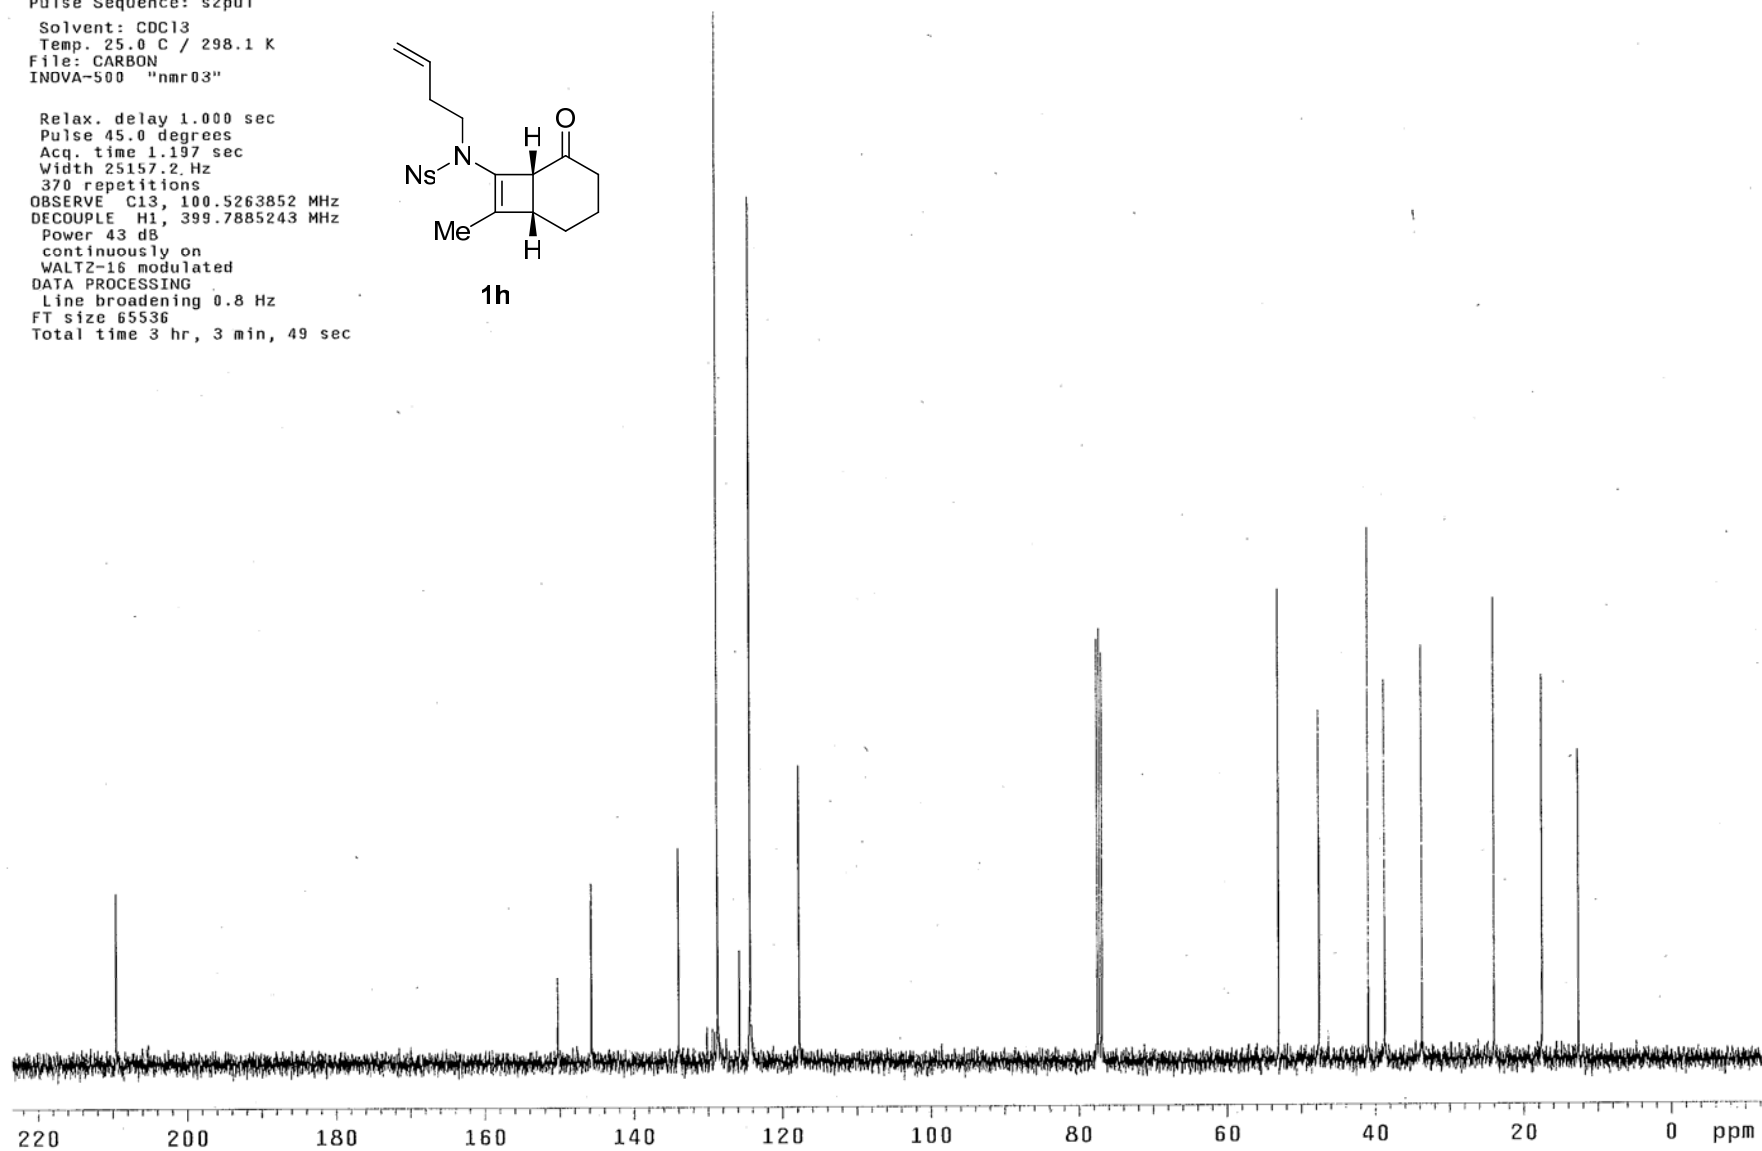

wxn429-2\_11Mar2013

Archive directory: /export/home/xiaona/vnmrsys/data  
Sample directory: wxn429-2\_11Mar2013

Pulse Sequence: s2pu1  
Solvent: CDCl3  
Temp: 25.0 C / 298.1 K  
File: PROTON  
INOVA-500 "nmr03"

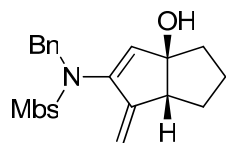

3a

Relax. delay 1.000 sec  
Pulse 45.0 degrees  
Acq. time 3.747 sec  
Width 8000.0 Hz  
8 repetitions  
OBSERVE H1, 499.7288170 MHz  
DATA PROCESSING  
Line broadening 0.5 Hz  
FT size 65536  
Total time 0 min, 38 sec

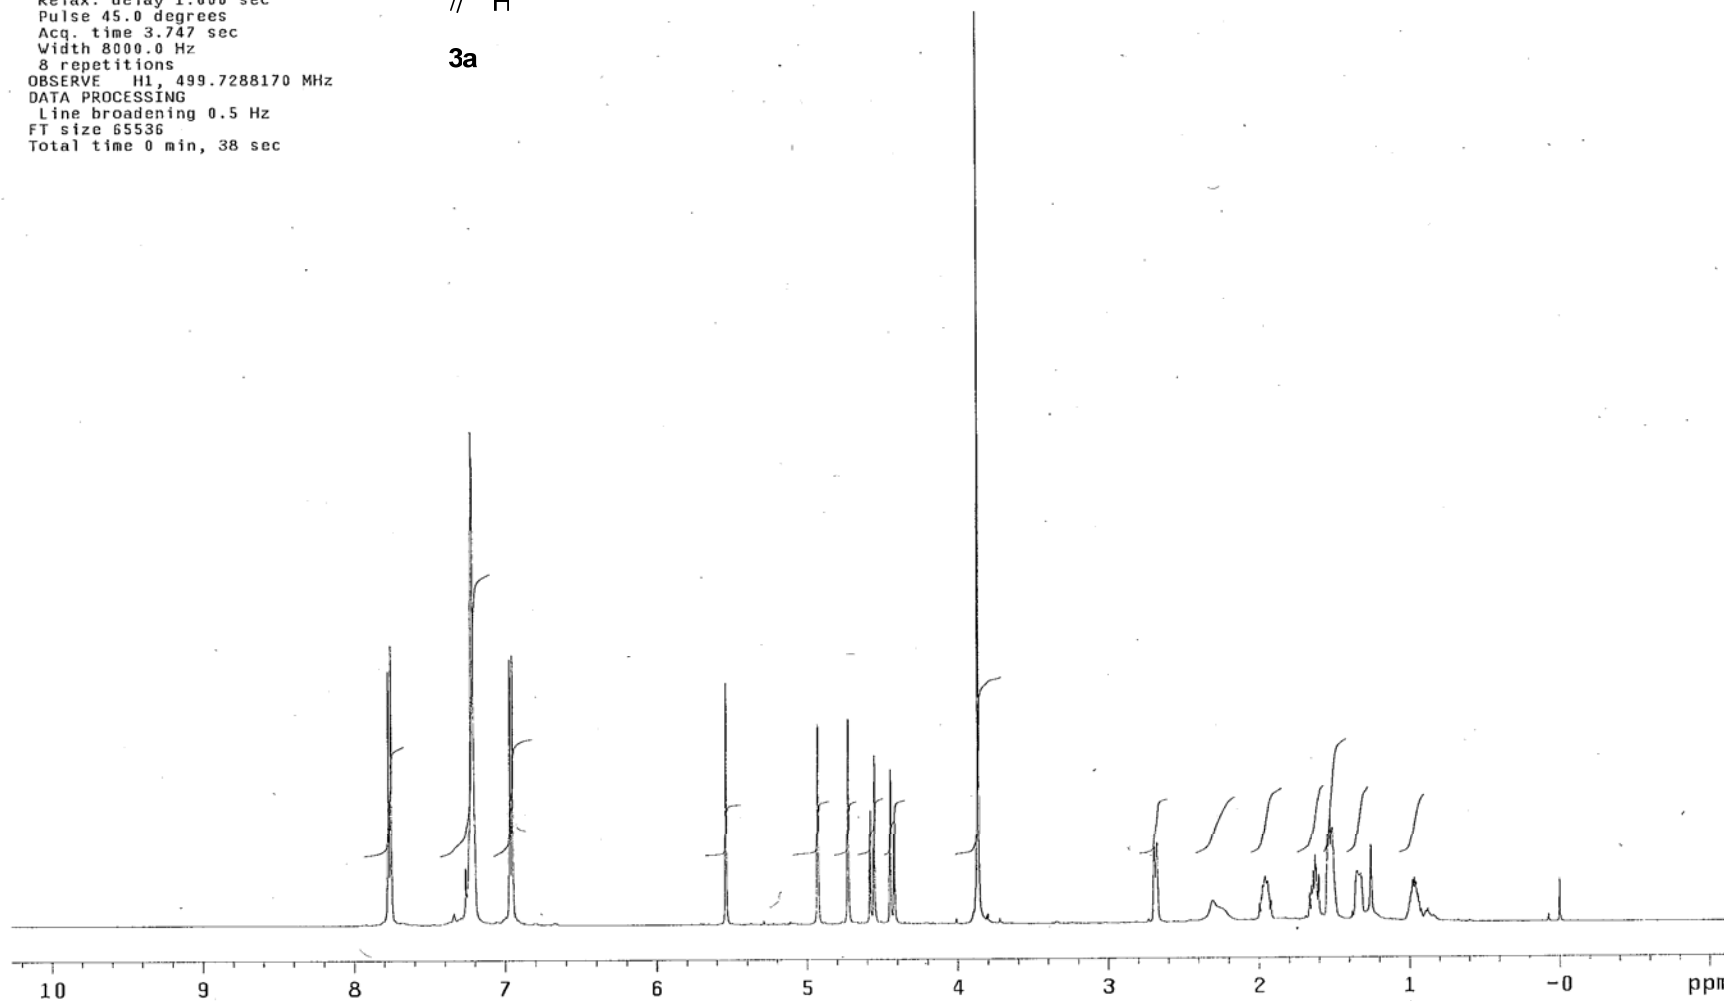



wxn429-2\_09Mar2013

Archive directory: /export/home/xiaona/vnmrsys/data  
Sample directory: wxn429-2\_09Mar2013

Pulse Sequence: s2pul

Solvent: CDCl3  
Temp. 25.0 C / 298.1 K  
User: 1-14-87  
File: CARBON  
INOVA-500 "nmr03"

Relax. delay 1.000 sec  
Pulse 45.0 degrees  
Acq. time 1.299 sec  
Width 31446.5 Hz  
267 repetitions  
OBSERVE C13, 125.6568915 MHz  
DECOUPLE H1, 499.7312897 MHz  
Power 48 dB  
continuously on  
WALTZ-16 modulated  
DATA PROCESSING  
Line broadening 0.5 Hz  
FT size 131072  
Total time 3 hr, 12 min, 23 sec

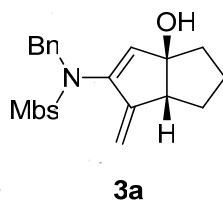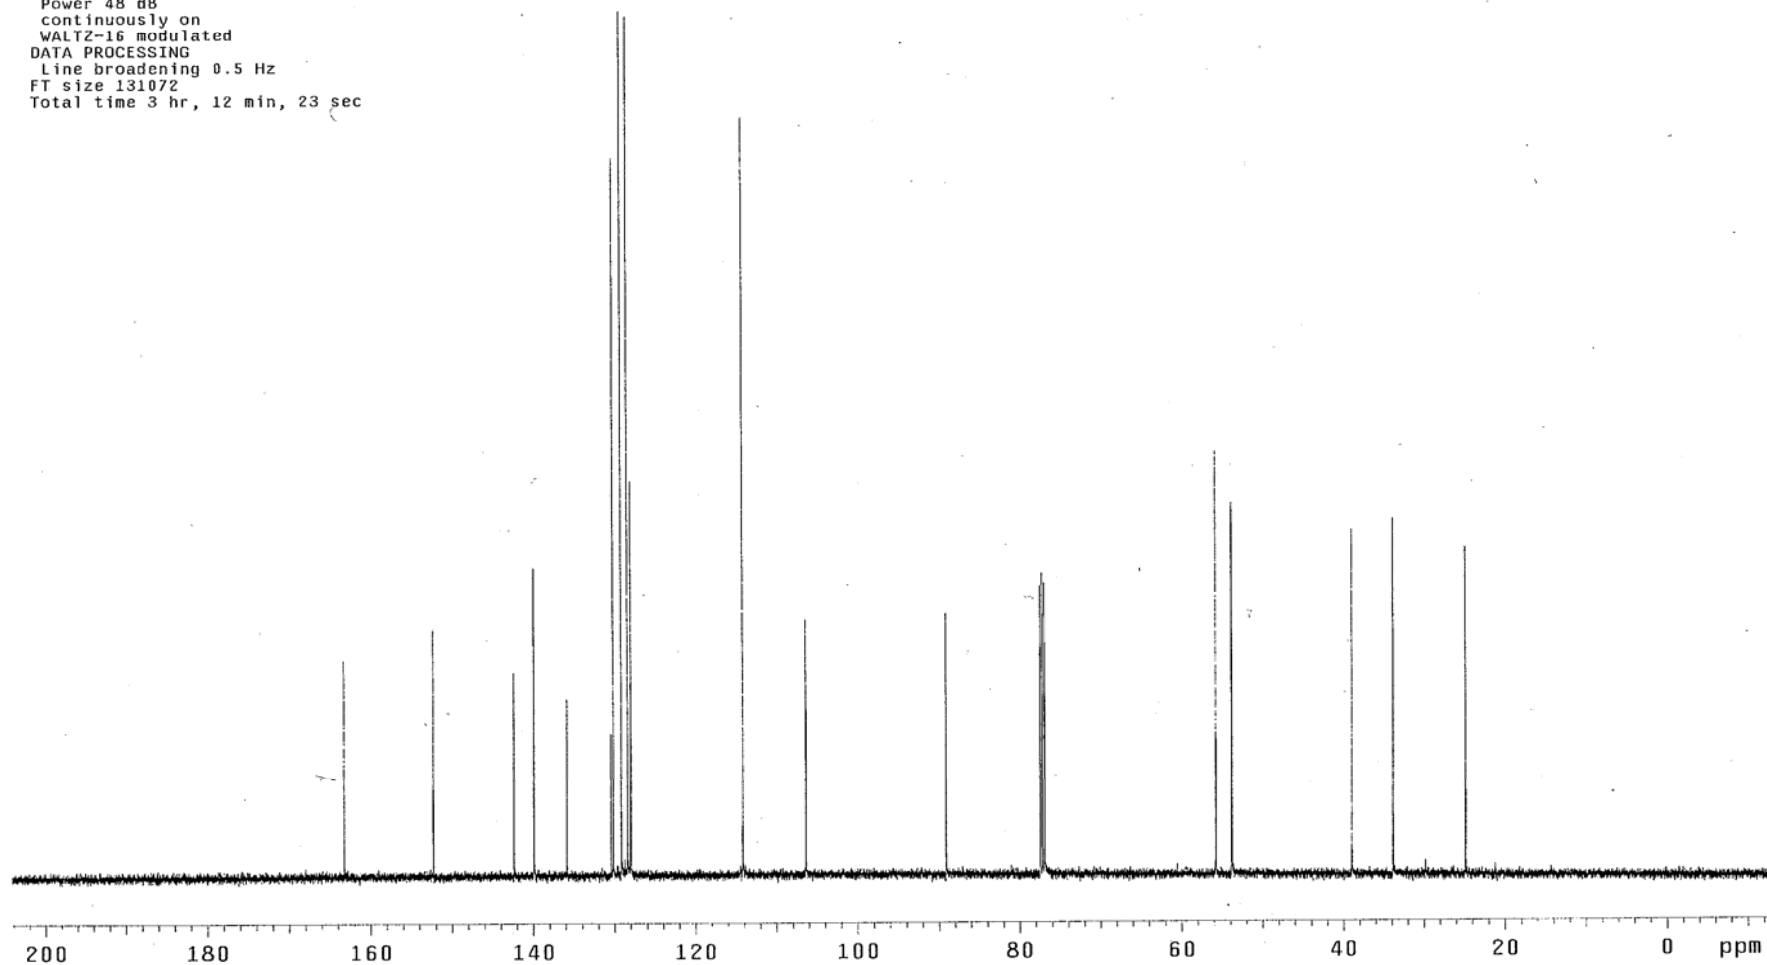

wxn519-1\_07Sep2013

Archive directory: /export/home/xiaona/vnmrsys/data  
Sample directory: wxn519-1\_07Sep2013

Pulse Sequence: s2pul

Solvent: CDC13  
Temp. 25.0 C / 298.1 K  
File: PROTON  
INOVA-500 "nmr03"

Relax. delay 1.000 sec  
Pulse 45.0 degrees  
Acq. time 3.754 sec  
Width 6387.7 Hz  
8 repetitions  
OBSERVE H1, 399.7865231 MHz  
DATA PROCESSING  
FT size 65536  
Total time 0 min, 57 sec

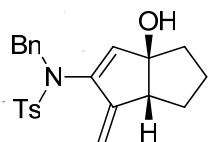

**3b**

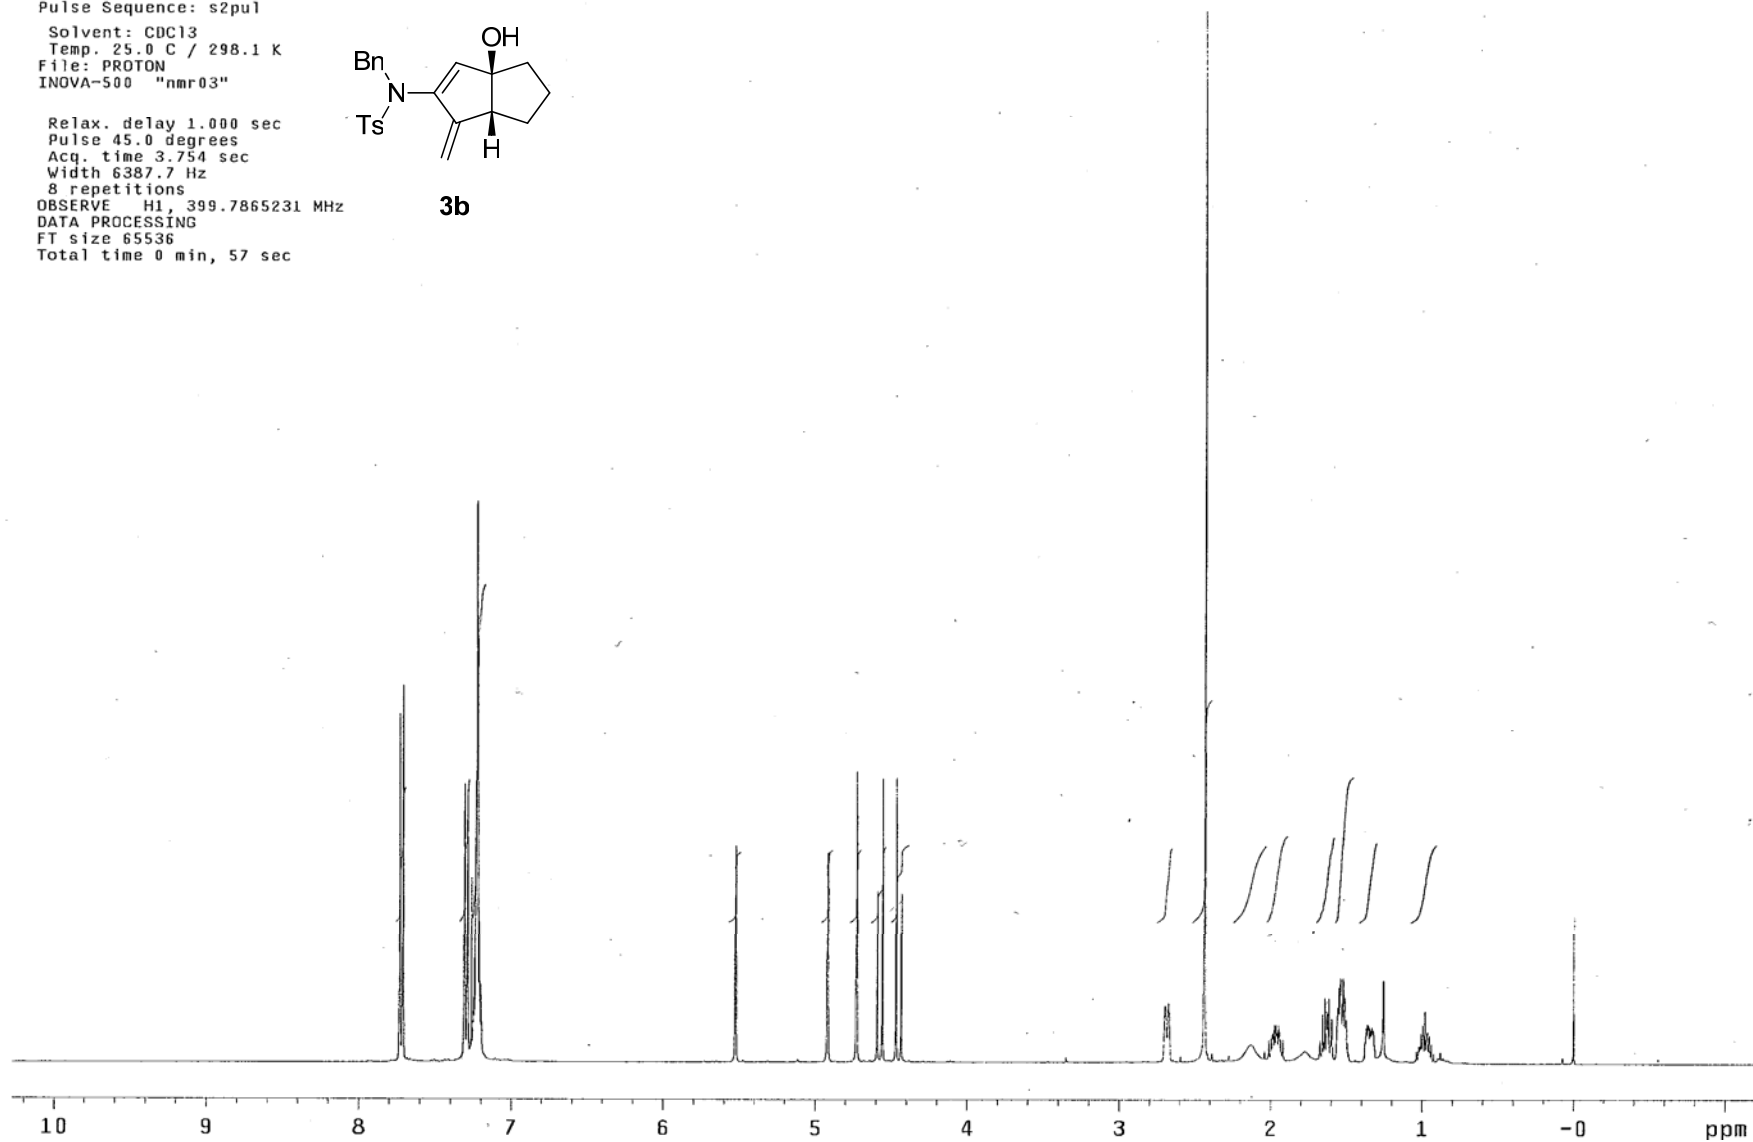

wxn519-1\_07Sep2013

Archive directory: /export/home/xiaona/vnmrsys/data  
Sample directory: wxn519-1\_07Sep2013

Pulse Sequence: s2pul

Solvent: CDCl3  
Temp. 25.0 C / 298.1 K  
File: CARBDN  
INOVA-500 "nmr03"

Relax. delay 1.000 sec  
Pulse 45.0 degrees  
Acq. time 1.197 sec  
Width 25157.2 Hz  
342 repetitions  
OBSERVE C13, 100.5263844 MHz  
DECOUPLE H1, 399.7885243 MHz  
Power 43 dB  
continuously on  
WALTZ-16 modulated  
DATA PROCESSING  
Line broadening 0.8 Hz  
FT size 65536  
Total time 3 hr, 3 min, 49 sec

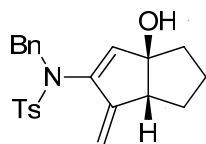

**3b**

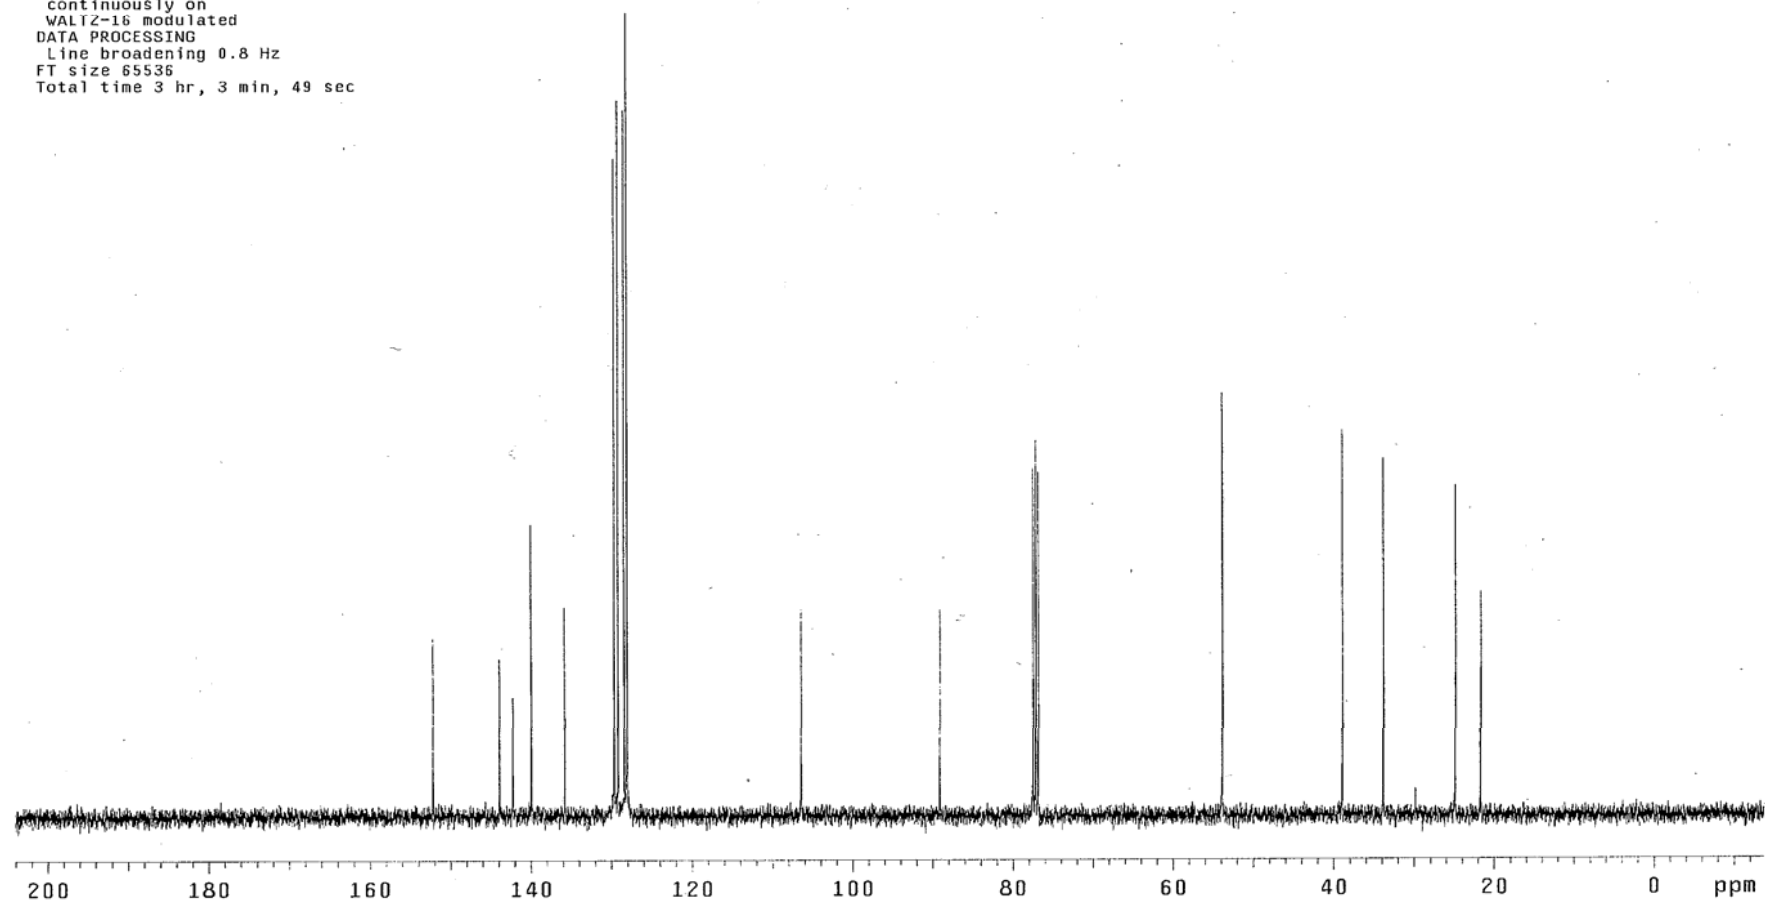

wxn476-1\_05Jun2013

Archive directory: /export/home/xiaona/vnmrsys/data  
Sample directory: wxn476-1\_05Jun2013

Pulse Sequence: s2pul

Solvent: CDCl3  
Temp. 25.0 C / 298.1 K  
File: PROTON  
INOVA-500 "nmr03"

Relax. delay 1.000 sec  
Pulse 45.0 degrees  
Acq. time 3.754 sec  
Width 6387.7 Hz  
8 repetitions  
OBSERVE H1, 399.7865218 MHz  
DATA PROCESSING  
FT size 65536  
Total time 0 min, 57 sec

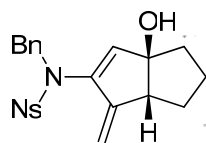

3c

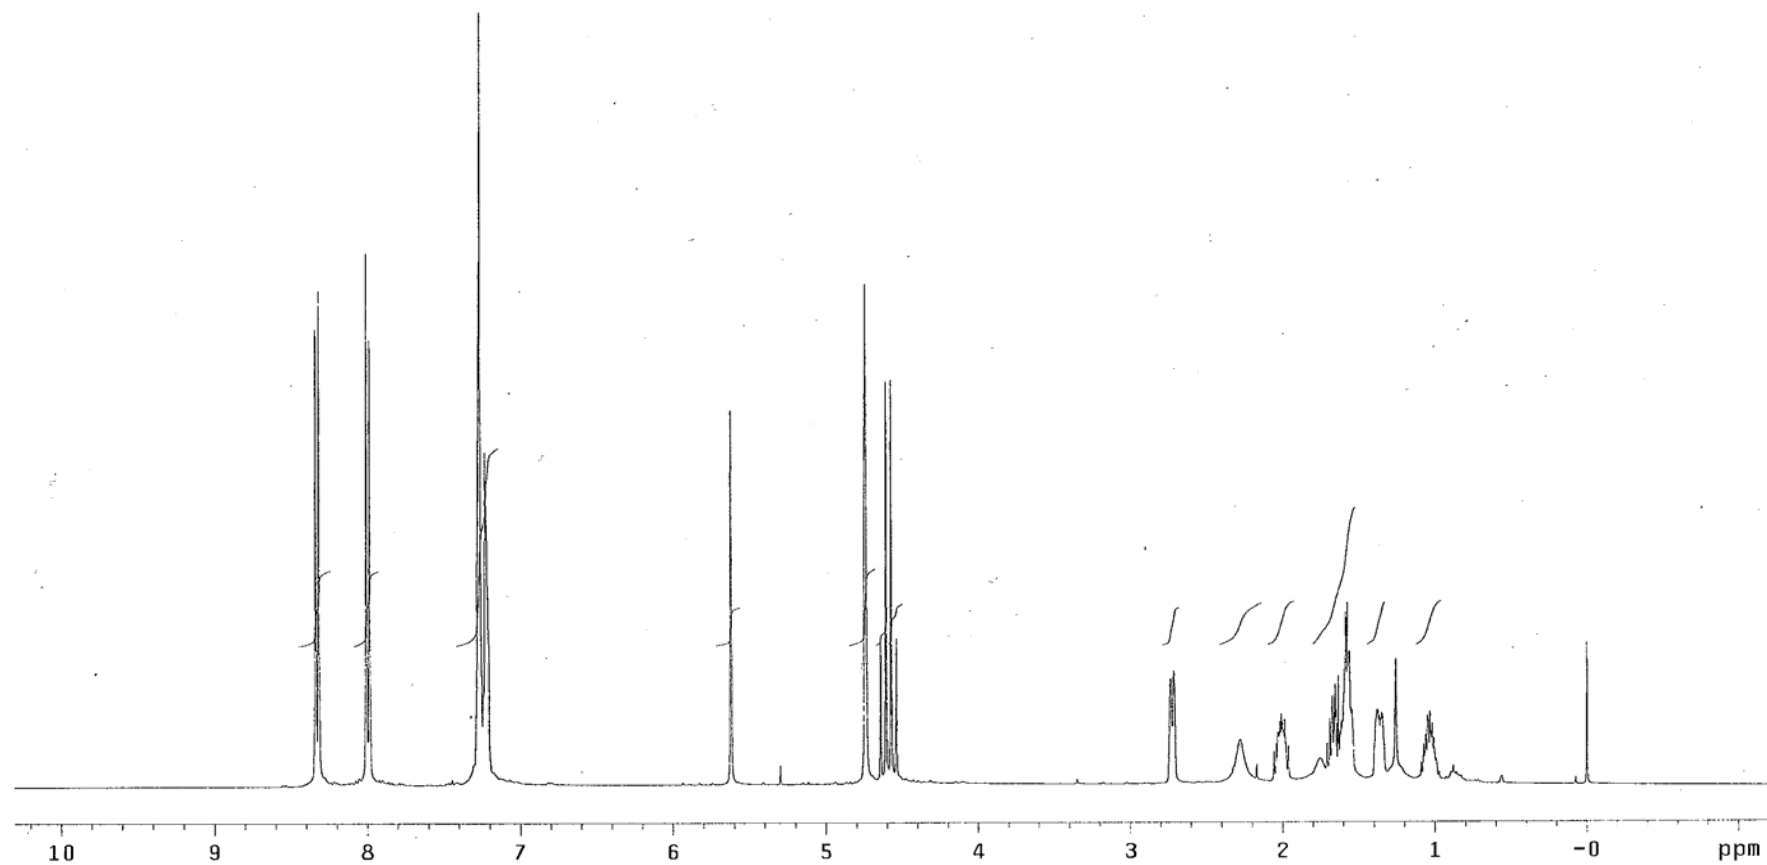

wxn476-1\_05Jun2013

Archive directory: /export/home/xiaona/vnmrsys/data  
Sample directory: wxn476-1\_05Jun2013

Pulse Sequence: s2pu1

Solvent: CDCl3  
Temp. 25.0 C / 298.1 K  
File: CARBON  
INOVA-500 "nmr03"

Relax. delay 1.000 sec  
Pulse 45.0 degrees  
Acq. time 1.197 sec  
Width 25157.2 Hz  
306 repetitions  
OBSERVE C13, 100.5263844 MHz  
DECOUPLE H1, 399.7885243 MHz  
Power 43 dB  
continuously on  
WALTZ-16 modulated  
DATA PROCESSING  
Line broadening 0.8 Hz  
FT size 65536  
Total time 1 hr, 13 min, 31 sec

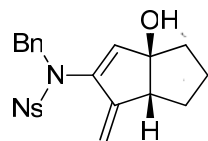

3c

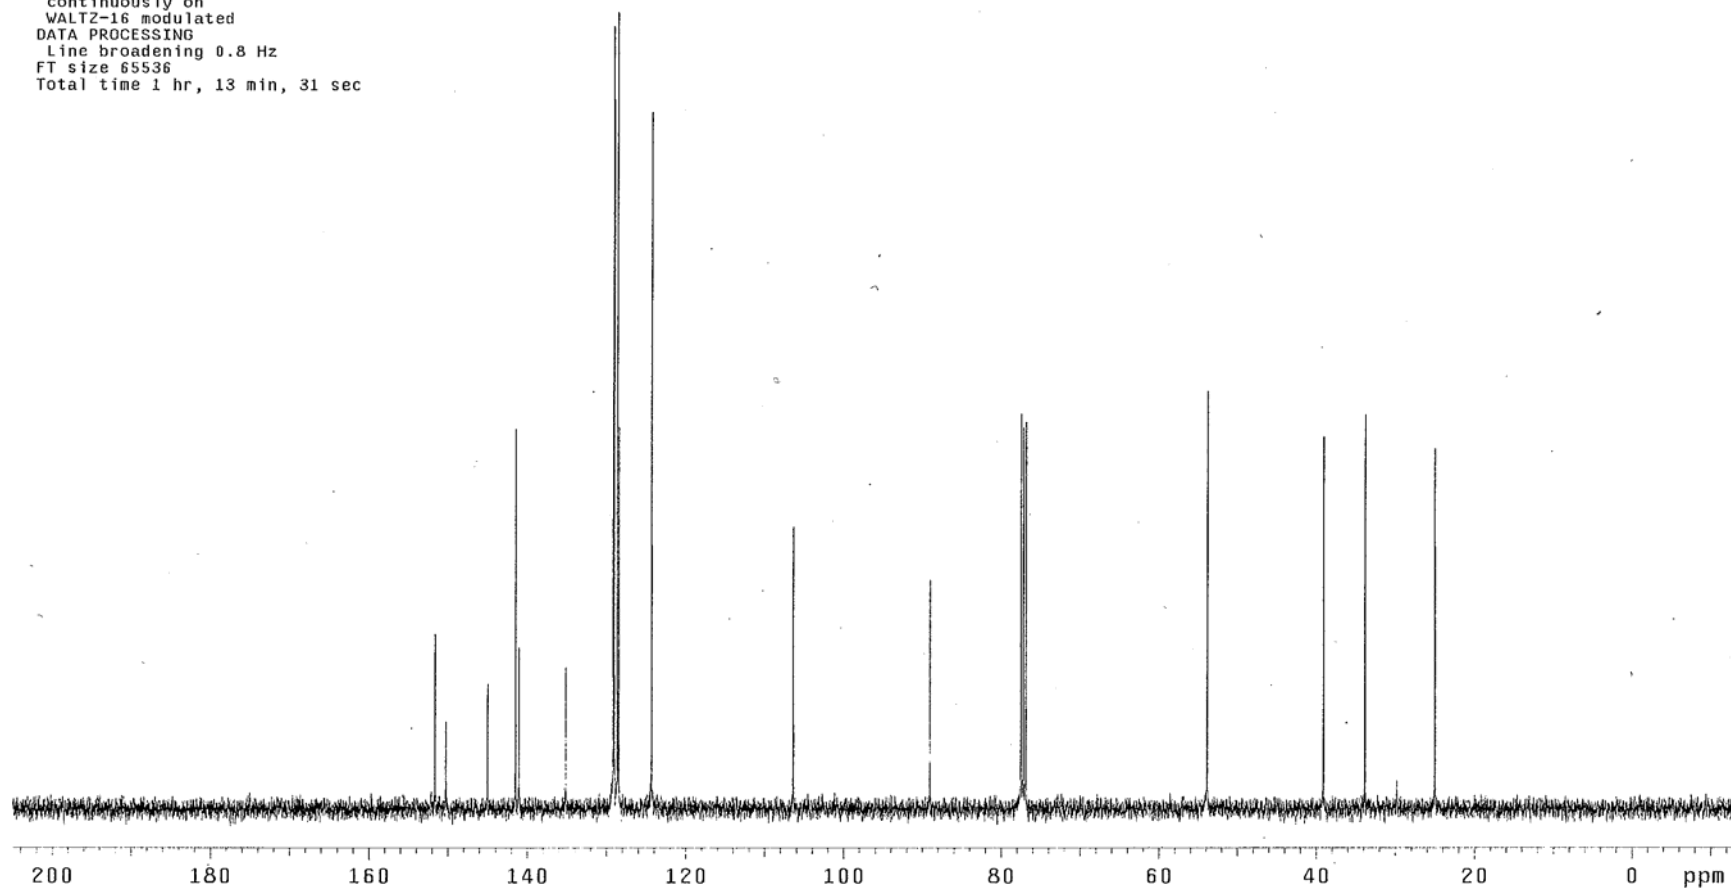

wxn534-2\_21Sep2013

Archive directory: /export/home/xiaona/vnmrsys/data  
Sample directory: wxn534-2\_21Sep2013

Pulse Sequence: s2pu1

Solvent: CDCl3  
Temp. 25.0 C / 298.1 K  
File: PROTON  
INOVA-500 "nmr03"

Relax. delay 1.000 sec  
Pulse 45.0 degrees  
Acq. time 3.747 sec  
Width 8000.0 Hz  
8 repetitions  
OBSERVE H1, 499.7288117 MHz  
DATA PROCESSING  
Line broadening 0.5 Hz  
FT size 65536  
Total time 0 min, 38 sec

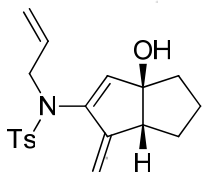

3d

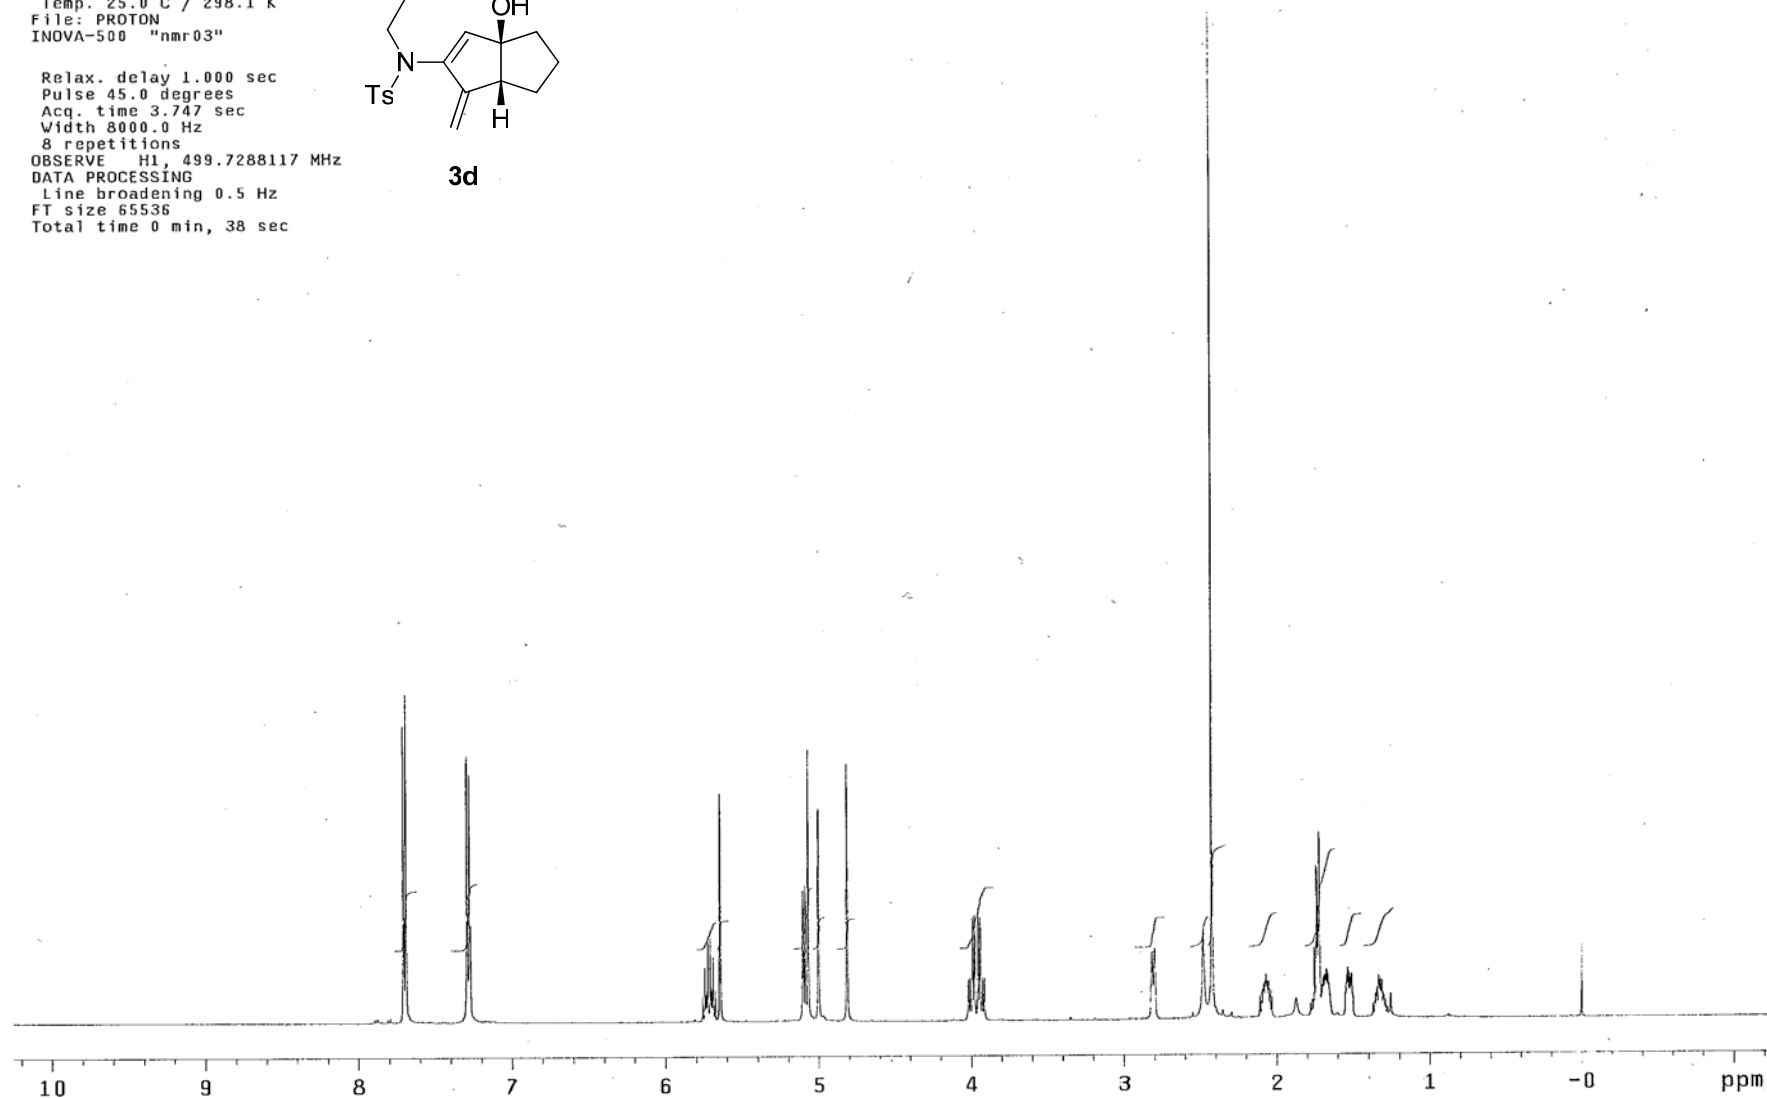

wxn534-2\_21Sep2013

Archive directory: /export/home/xiaona/vnmrsys/data  
Sample directory: wxn534-2\_21Sep2013

Pulse Sequence: s2pul

Solvent: CDCl<sub>3</sub>  
Temp. 25.0 C / 298.1 K  
User: 1-14-87  
File: CARBON  
INOVA-500 "nmr03"

Relax. delay 1.000 sec  
Pulse 45.0 degrees  
Acq. time 1.299 sec  
Width 31446.5 Hz  
335 repetitions  
OBSERVE C13, 125.6568905 MHz  
DECOUPLE H1, 499.7312897 MHz  
Power 48 dB  
continuously on  
WALTZ-16 modulated  
DATA PROCESSING  
Line broadening 0.5 Hz  
FT size 131072  
Total time 3 hr, 12 min, 23 sec

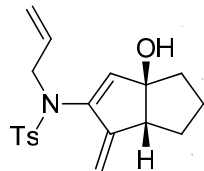

3d

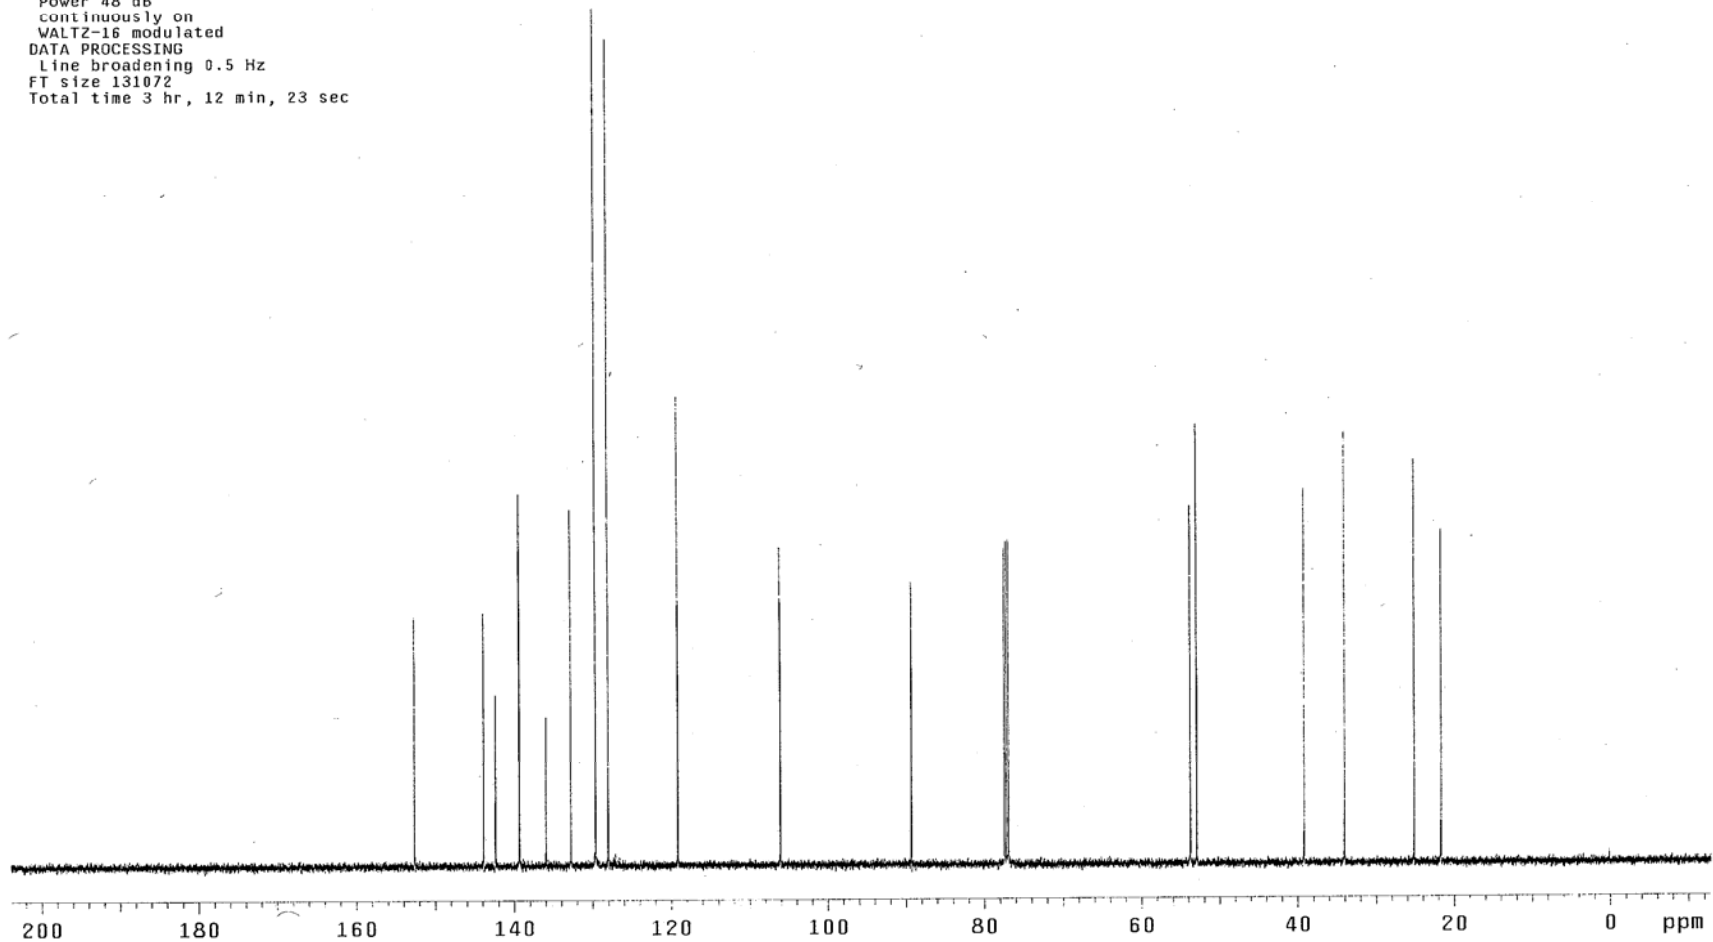

wxn518-3\_30Sep2013-14:24:46

Archive directory: /export/home/xiaona/vnmrsys/data  
Sample directory: wxn518-3\_30Sep2013-14:24:46

Pulse Sequence: s2pu1  
Solvent: CDCl3  
Temp: 25.0 C / 298.1 K  
File: PROTON  
INOVA-500 "nmr03"

Relax. delay 1.000 sec  
Pulse 45.0 degrees  
Acq. time 3.747 sec  
Width 8000.0 Hz  
8 repetitions  
OBSERVE H1, 499.7288163 MHz  
DATA PROCESSING  
Line broadening 0.5 Hz  
FT size 65536  
Total time 0 min, 38 sec

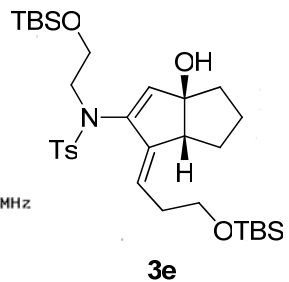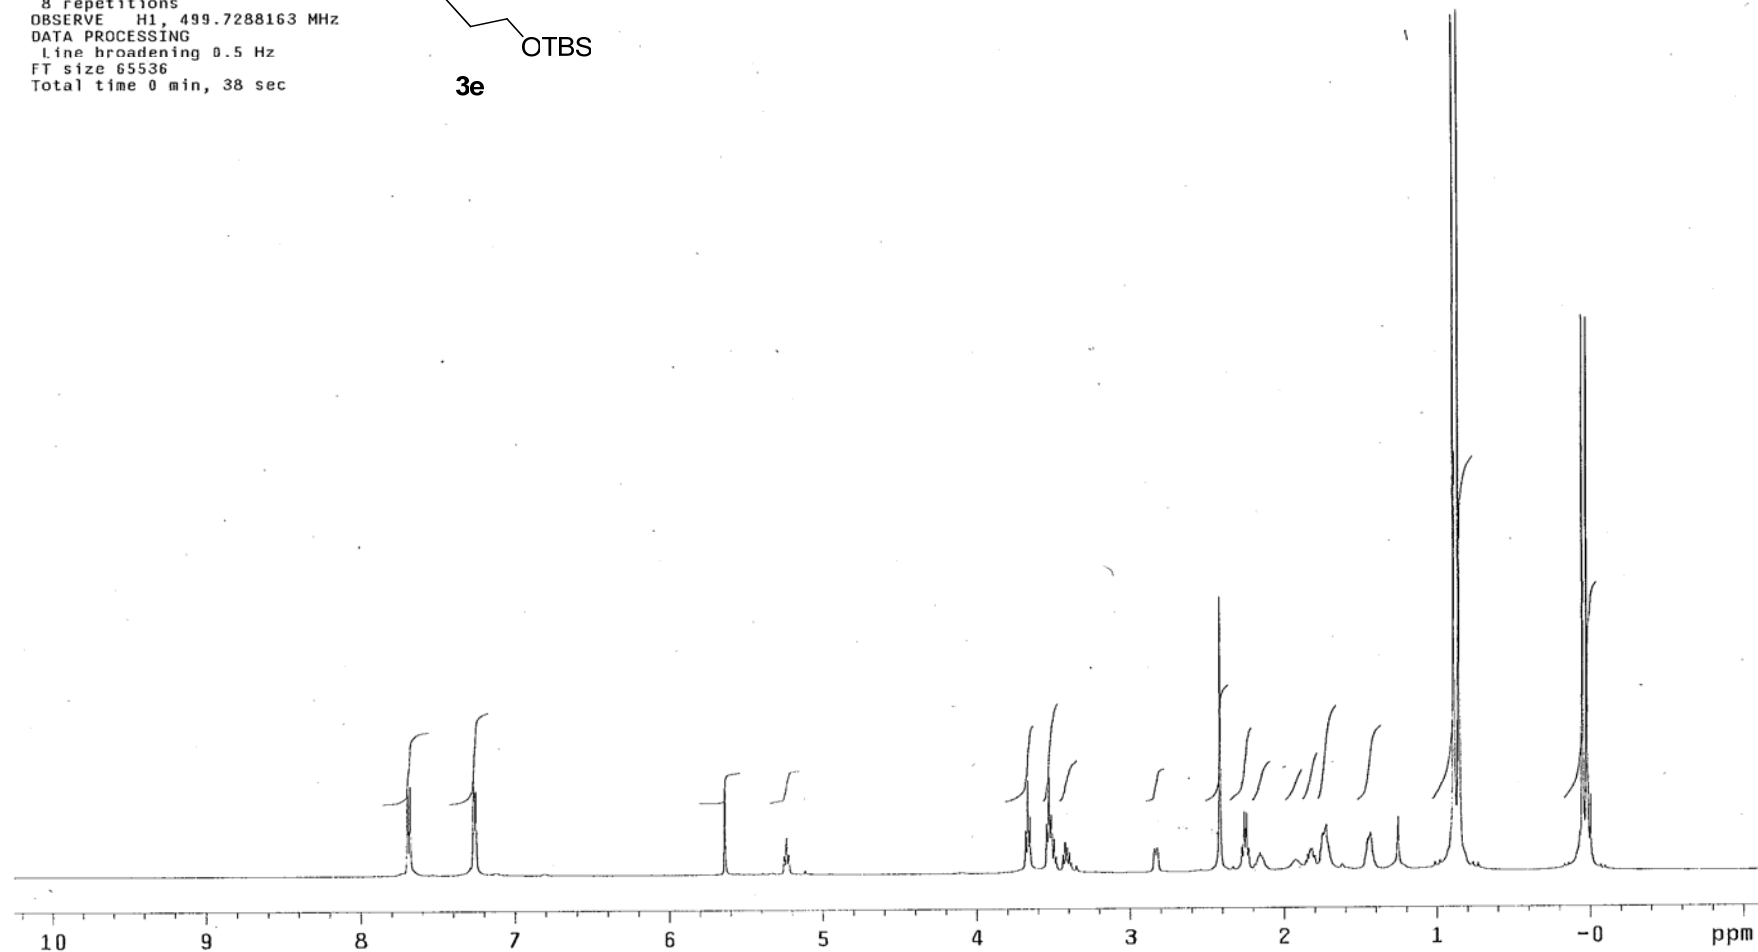



wxn518-3\_06Sep2013

Archive directory: /export/home/xiaona/vnmrsys/data  
Sample directory: wxn518-3\_06Sep2013

Pulse Sequence: s2pu1

Solvent: CDCl3  
Temp. 25.0 C / 298.1 K  
File: CARBON  
INOVA-500 "nmr03"

Relax. delay 1.000 sec  
Pulse 45.0 degrees  
Acq. time 1.197 sec  
Width 25157.2 Hz  
1052 repetitions  
OBSERVE C13, 100.5263814 MHz  
DECOUPLE H1, 399.7885243 MHz  
Power 43 dB  
continuously on  
WALTZ-16 modulated  
DATA PROCESSING  
Line broadening 0.8 Hz  
FT size 65536  
Total time 3 hr, 3 min, 49 sec

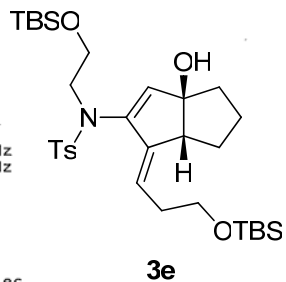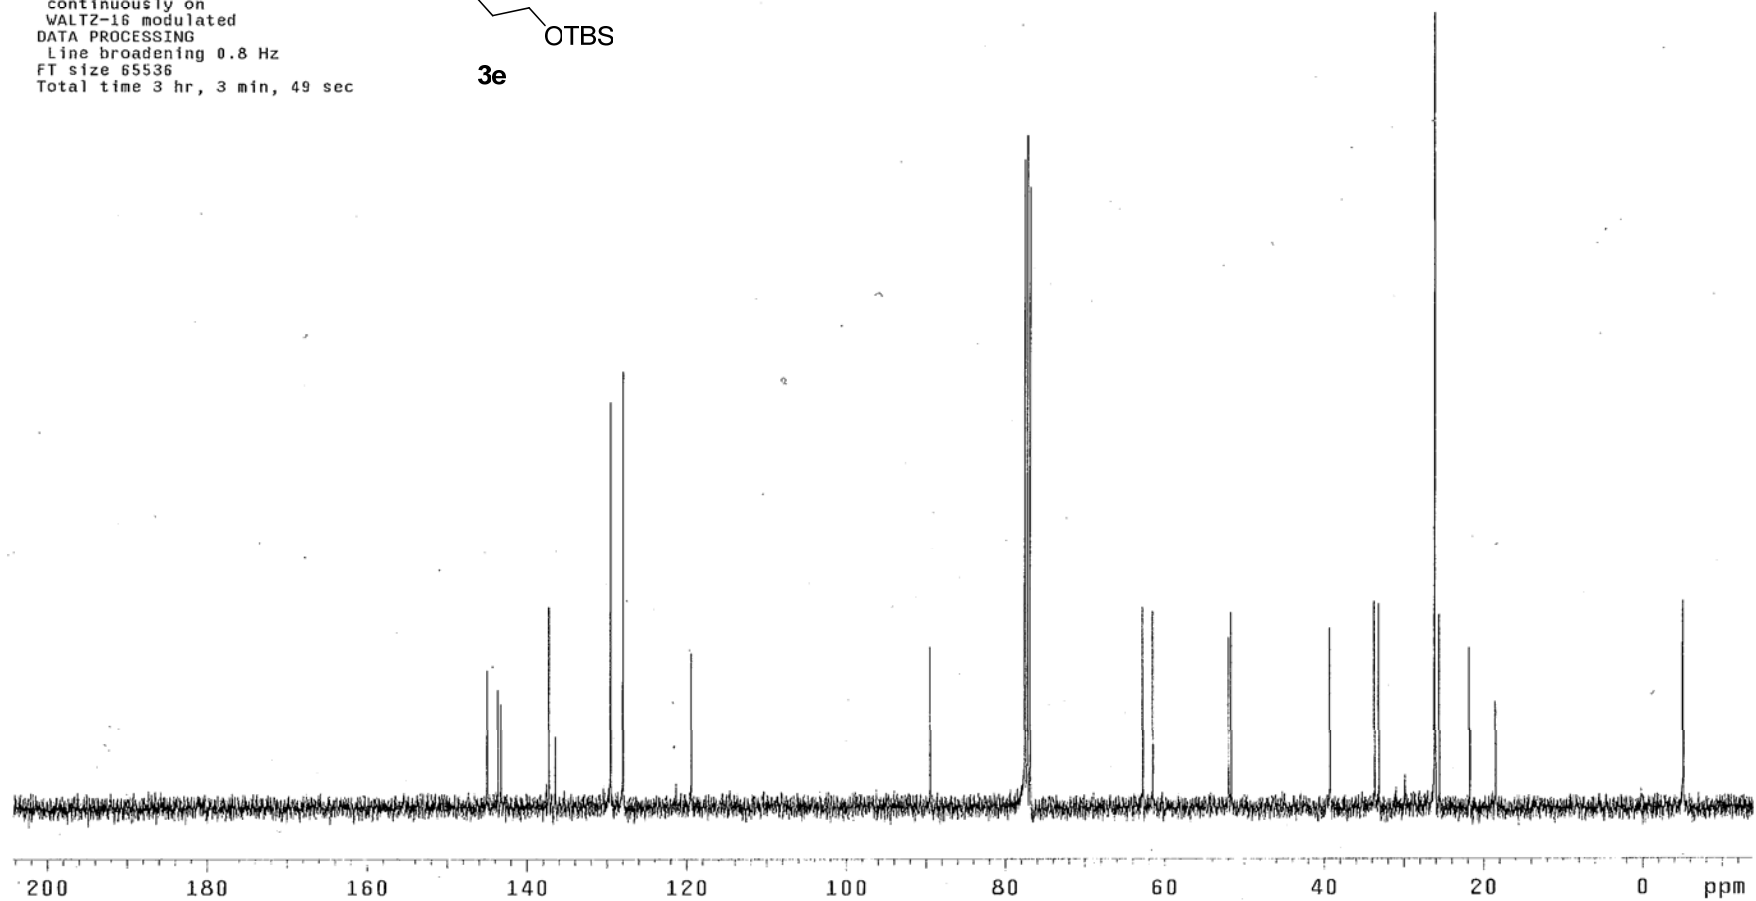

wxn518-1\_06Sep2013

Archive directory: /export/home/xiaona/vnmrsys/data  
Sample directory: wxn518-1\_06Sep2013

Pulse Sequence: s2pul  
Solvent: CDCl3  
Temp. 25.8 C / 298.1 K  
File: PROTON  
INOVA-500 "nmr03"

Relax. delay 1.000 sec  
Pulse 45.0 degrees  
Acq. time 3.754 sec  
Width 6387.7 Hz  
8 repetitions  
OBSERVE H1, 399.7865245 MHz  
DATA PROCESSING  
FT size 65536  
Total time 0 min, 57 sec

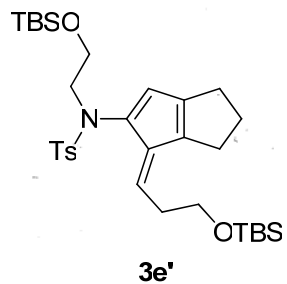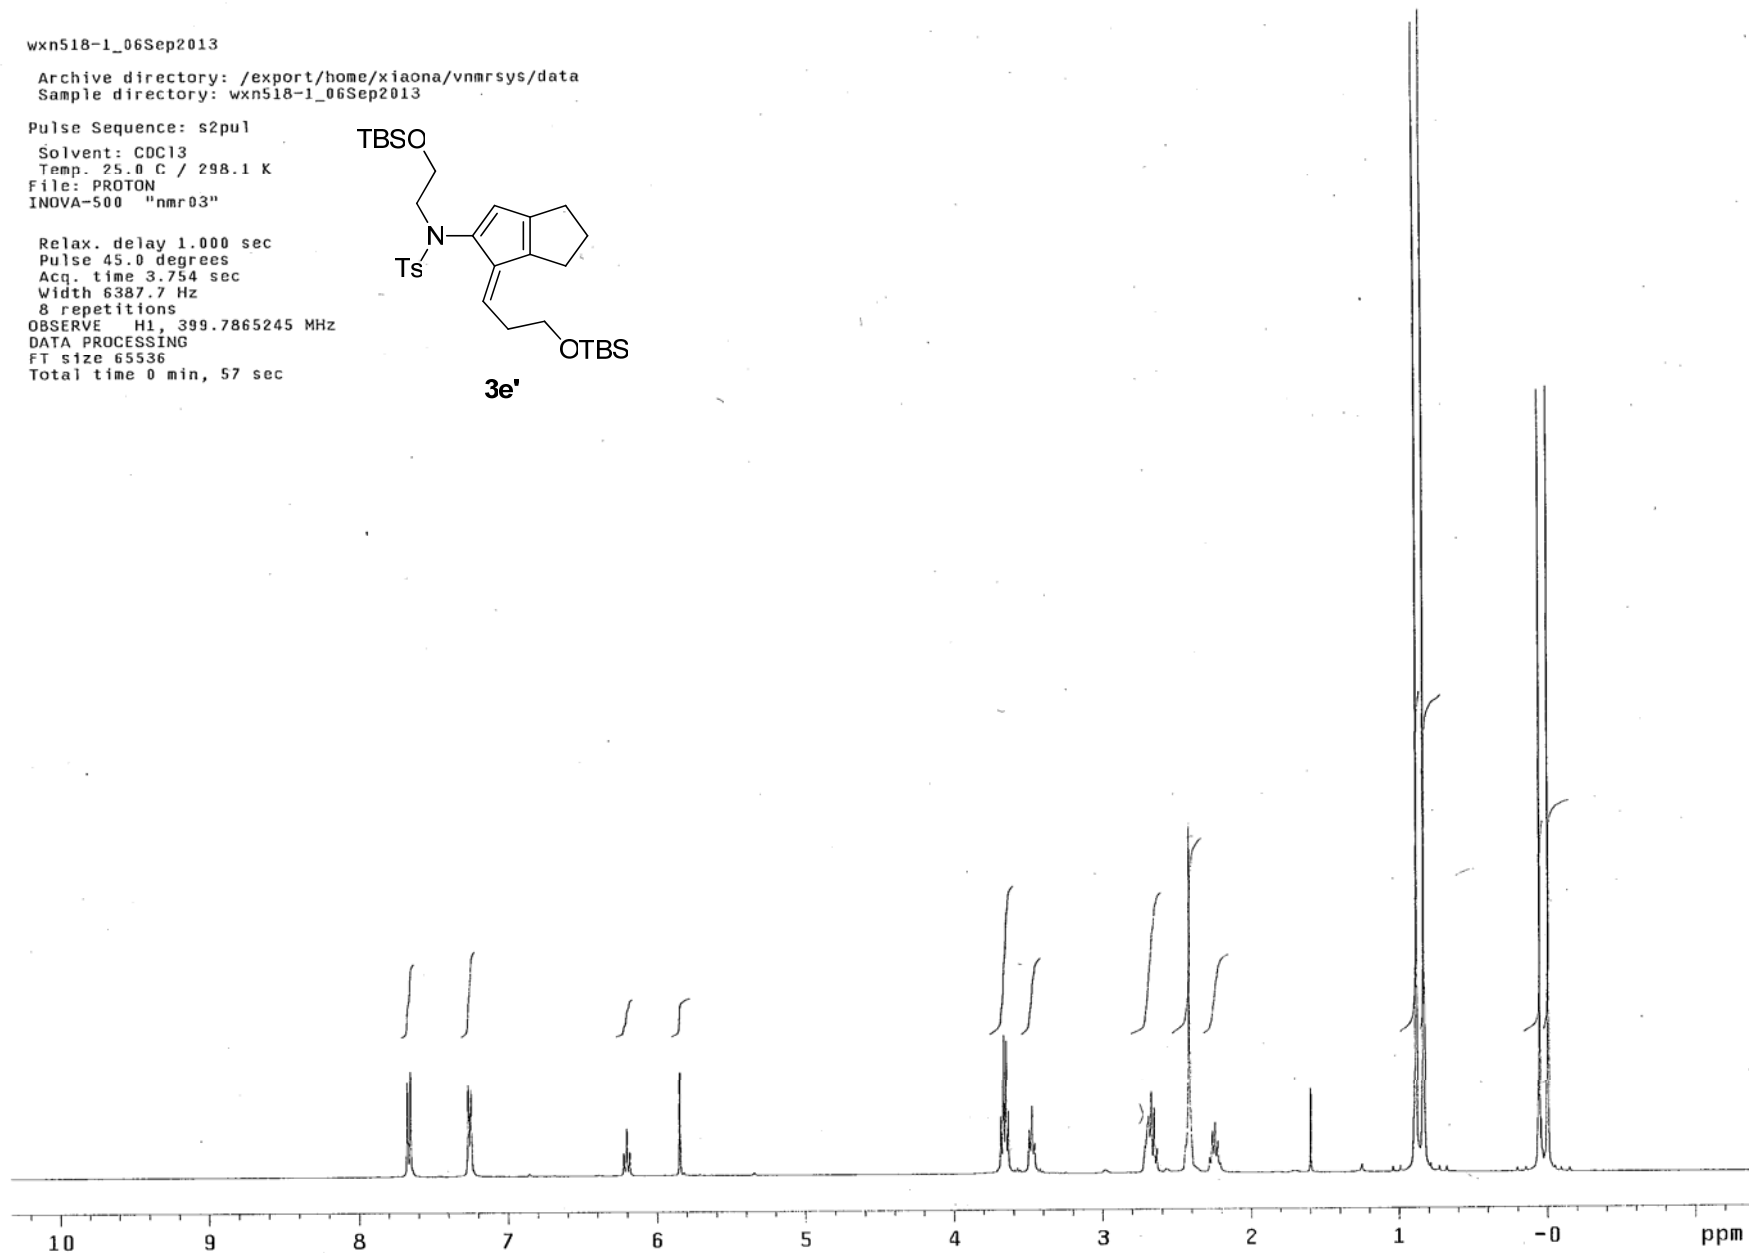

wxn518-1\_06Sep2013

Archive directory: /export/home/xiaona/vnmrsys/data  
Sample directory: wxn518-1\_06Sep2013

Pulse Sequence: s2pul  
Solvent: CDCl3  
Temp. 25.0 C / 298.1 K  
File: CARBON  
INOVA-500 "nmr03"

Relax. delay 1.000 sec  
Pulse 45.0 degrees  
Acq. time 1.197 sec  
Width 25157.2 Hz  
373 repetitions  
OBSERVE C13, 100.5263821 MHz  
DECOUPLE H1, 399.7885243 MHz  
Power 43 dB  
continuously on  
WALTZ-16 modulated  
DATA PROCESSING  
Line broadening 0.8 Hz  
FT size 65536  
Total time 3 hr, 3 min, 49 sec

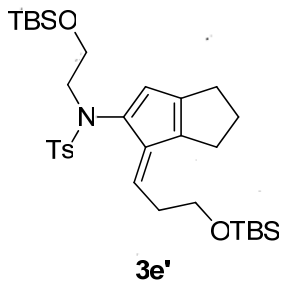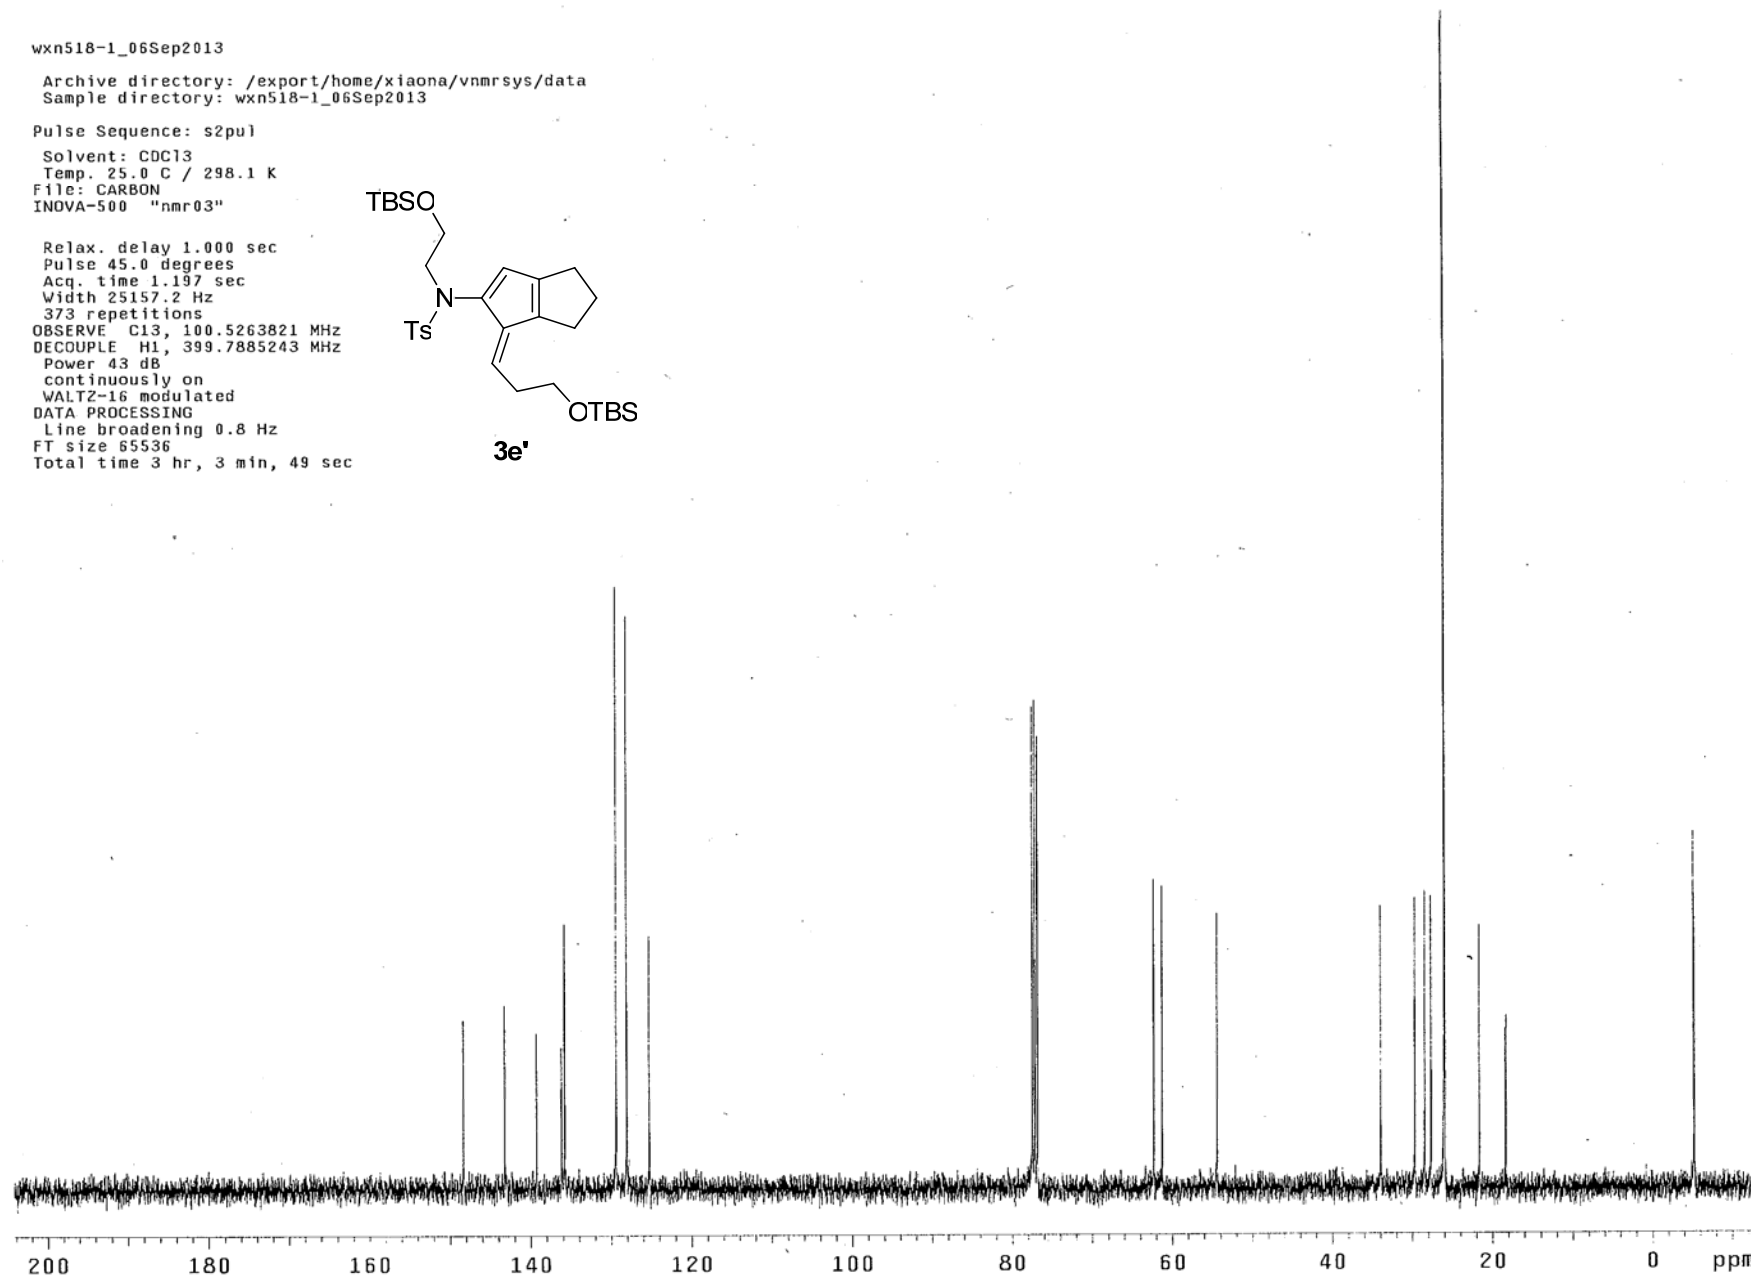

wxn541-3\_29Sep2013

Archive directory: /export/home/xiaona/vnmrsys/data  
Sample directory: wxn541-3\_29Sep2013

Pulse Sequence: s2pu1  
Solvent: CDCl3  
Temp. 25.0 C / 298.1 K  
File: PROTON  
INNOVA-500 "nmr03"

Relax. delay 1.000 sec  
Pulse 45.0 degrees  
Acq. time 3.747 sec  
Width 8000.0 Hz  
32 repetitions  
OBSERVE H1, 499.7288148 MHz  
DATA PROCESSING  
Line broadening 0.5 Hz  
FT size 65536  
Total time 2 min, 32 sec

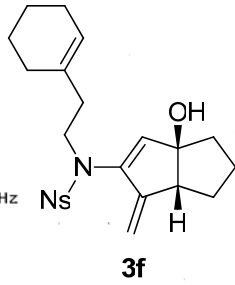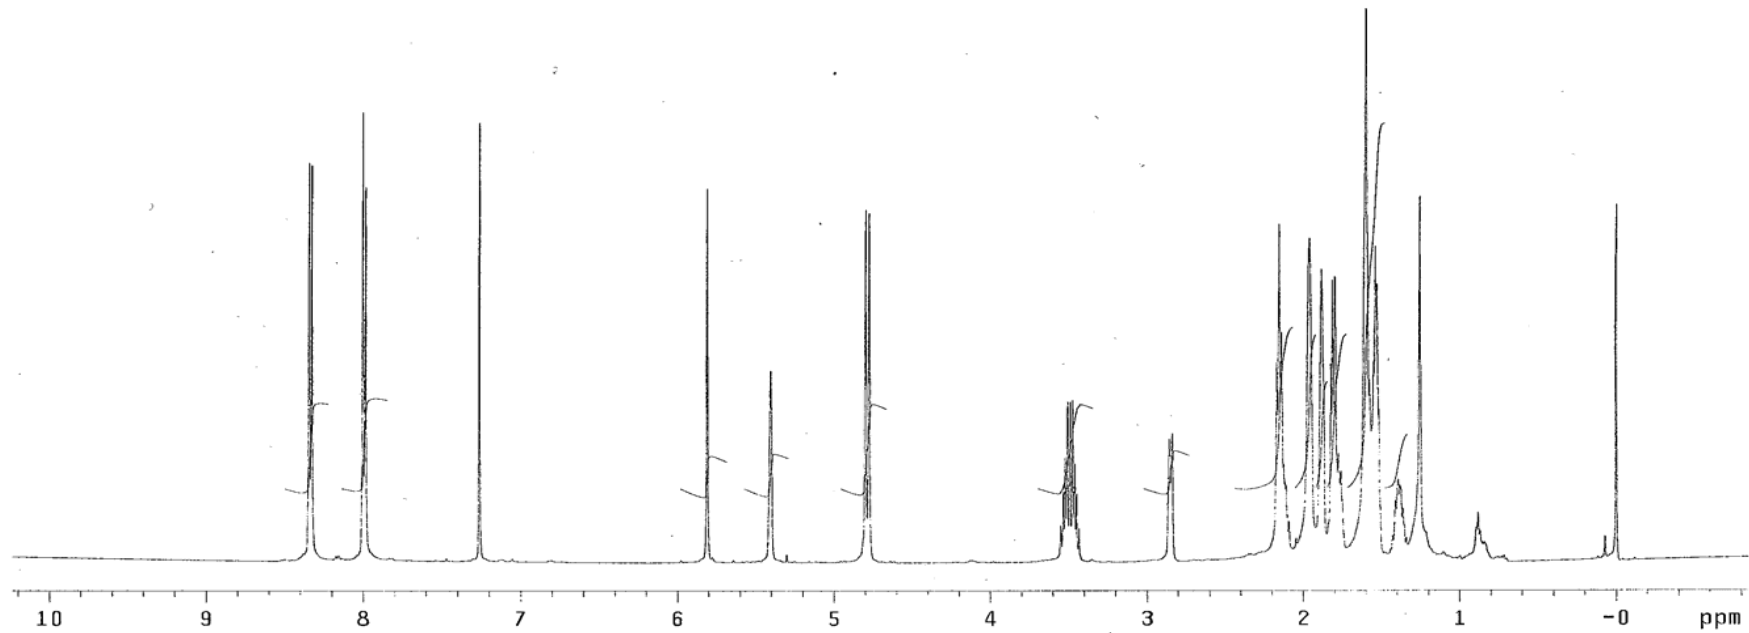

wxn541-3\_28Sep2013

Archive directory: /export/home/xiaona/vnmrsys/data  
Sample directory: wxn541-3\_28Sep2013

Pulse Sequence: s2pul

Solvent: CDCl3  
Temp. 25.0 C / 298.1 K  
User: 1-14-87  
File: CARBON  
INOVA-500 "nmr03"

Relax. delay 1.000 sec  
Pulse 45.0 degrees  
Acq. time 1.299 sec  
Width 31446.5 Hz  
18641 repetitions  
OBSERVE C13, 125.6568857 MHz  
DECOUPLE H1, 499.7312897 MHz  
Power 48 dB  
continuously on  
WALTZ-16 modulated  
DATA PROCESSING  
Line broadening 0.5 Hz  
FT size 131072  
Total time 128 hr, 12 min, 49 sec

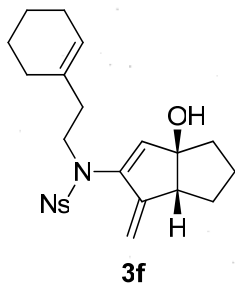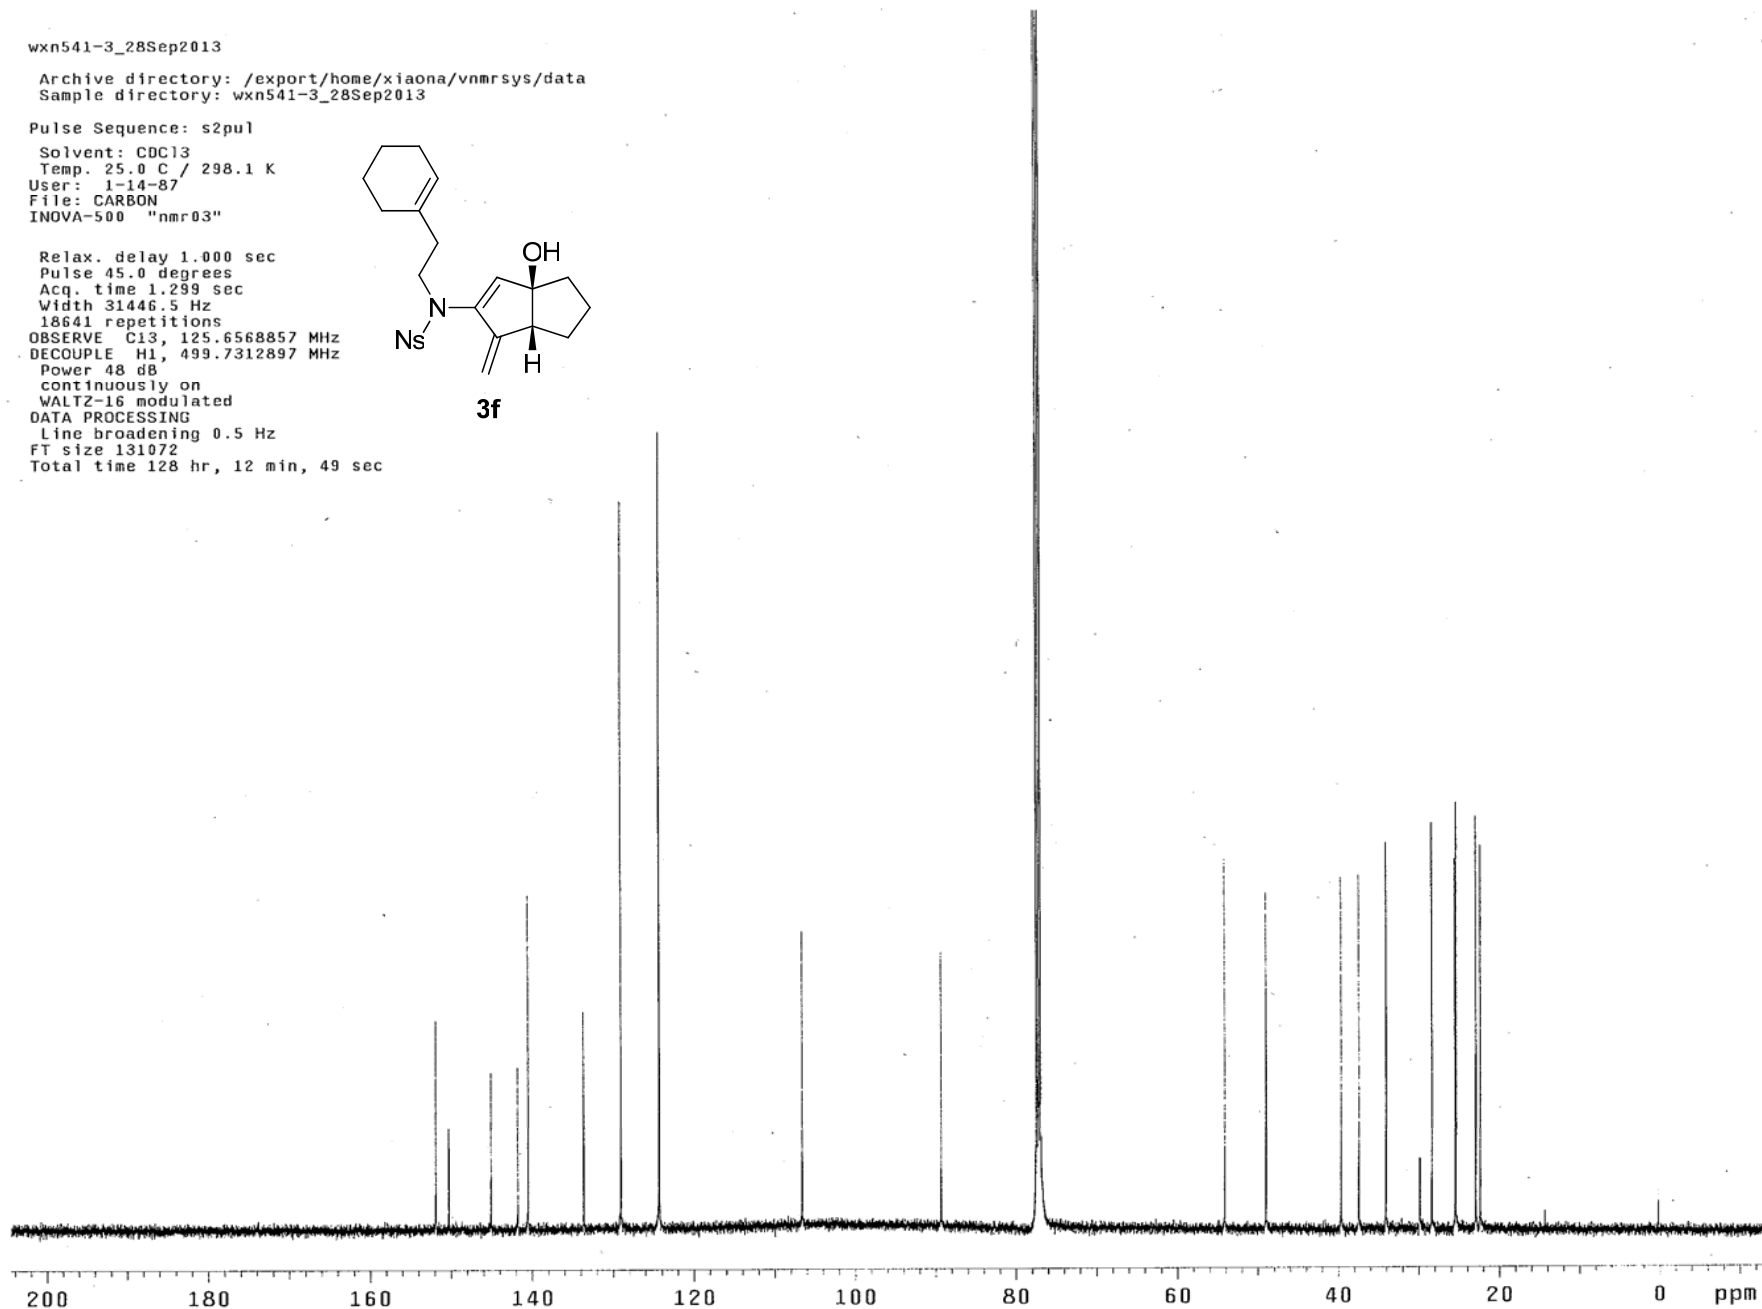

wxn541-1\_28Sep2013-22:12:32

Archive directory: /export/home/xiaona/vnmrsys/data  
Sample directory: wxn541-1\_28Sep2013-22:12:32

Pulse Sequence: s2pul

Solvent: CDCl3  
Temp. 25.0 C / 298.1 K  
File: PROTON  
INOVA-500 "nmr03"

Relax. delay 1.000 sec  
Pulse 45.0 degrees  
Acq. time 3.747 sec  
Width 8000.0 Hz  
32 repetitions  
OBSERVE H1, 499.7288168 MHz  
DATA PROCESSING  
Line broadening 0.5 Hz  
FT size 65536  
Total time 2 min, 32 sec

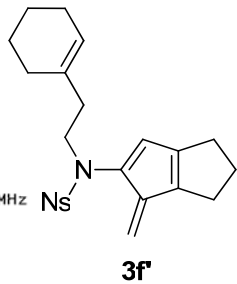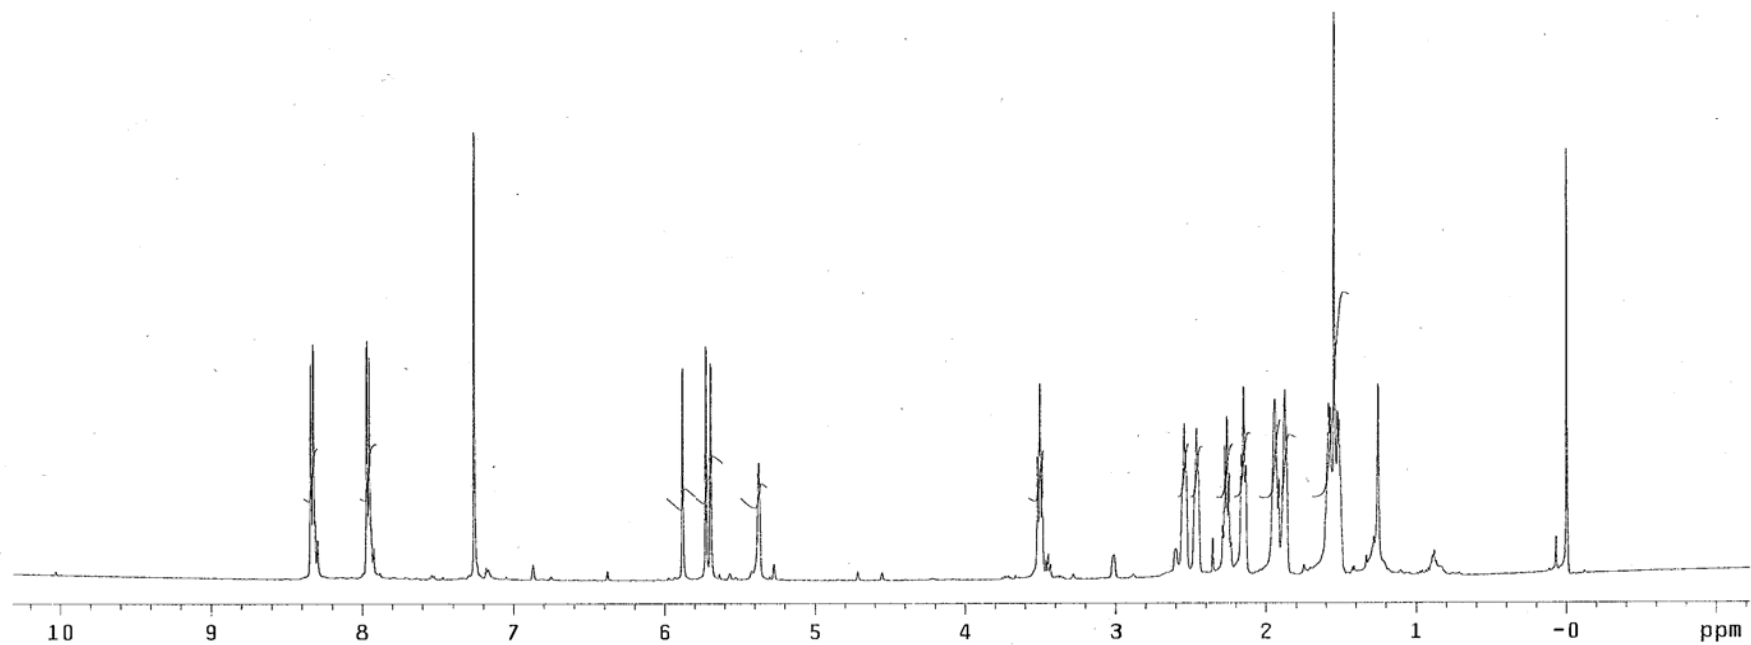

wxn541-1\_28Sep2013-15:01:42

Archive directory: /export/home/xiaona/vnmrsys/data  
Sample directory: wxn541-1\_28Sep2013-15:01:42

Pulse Sequence: s2pul

Solvent: CDCl<sub>3</sub>  
Temp. 25.0 C / 298.1 K  
User: 1-14-87  
File: CARBON  
INOVA-500 "nmr03"

Relax. delay 1.000 sec  
Pulse 45.0 degrees  
Acq. time 1.299 sec  
Width 31446.5 Hz  
11026 repetitions  
OBSERVE C13, 125.6568852 MHz  
DECOUPLE H1, 499.7312897 MHz  
Power 48 dB  
continuously on  
WALTZ-16 modulated  
DATA PROCESSING  
Line broadening 0.5 Hz  
FT size 131072  
Total time 12821 hr, 15 min, 40 sec

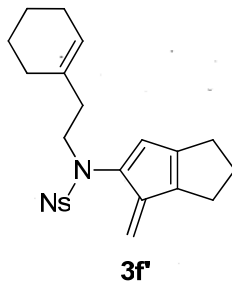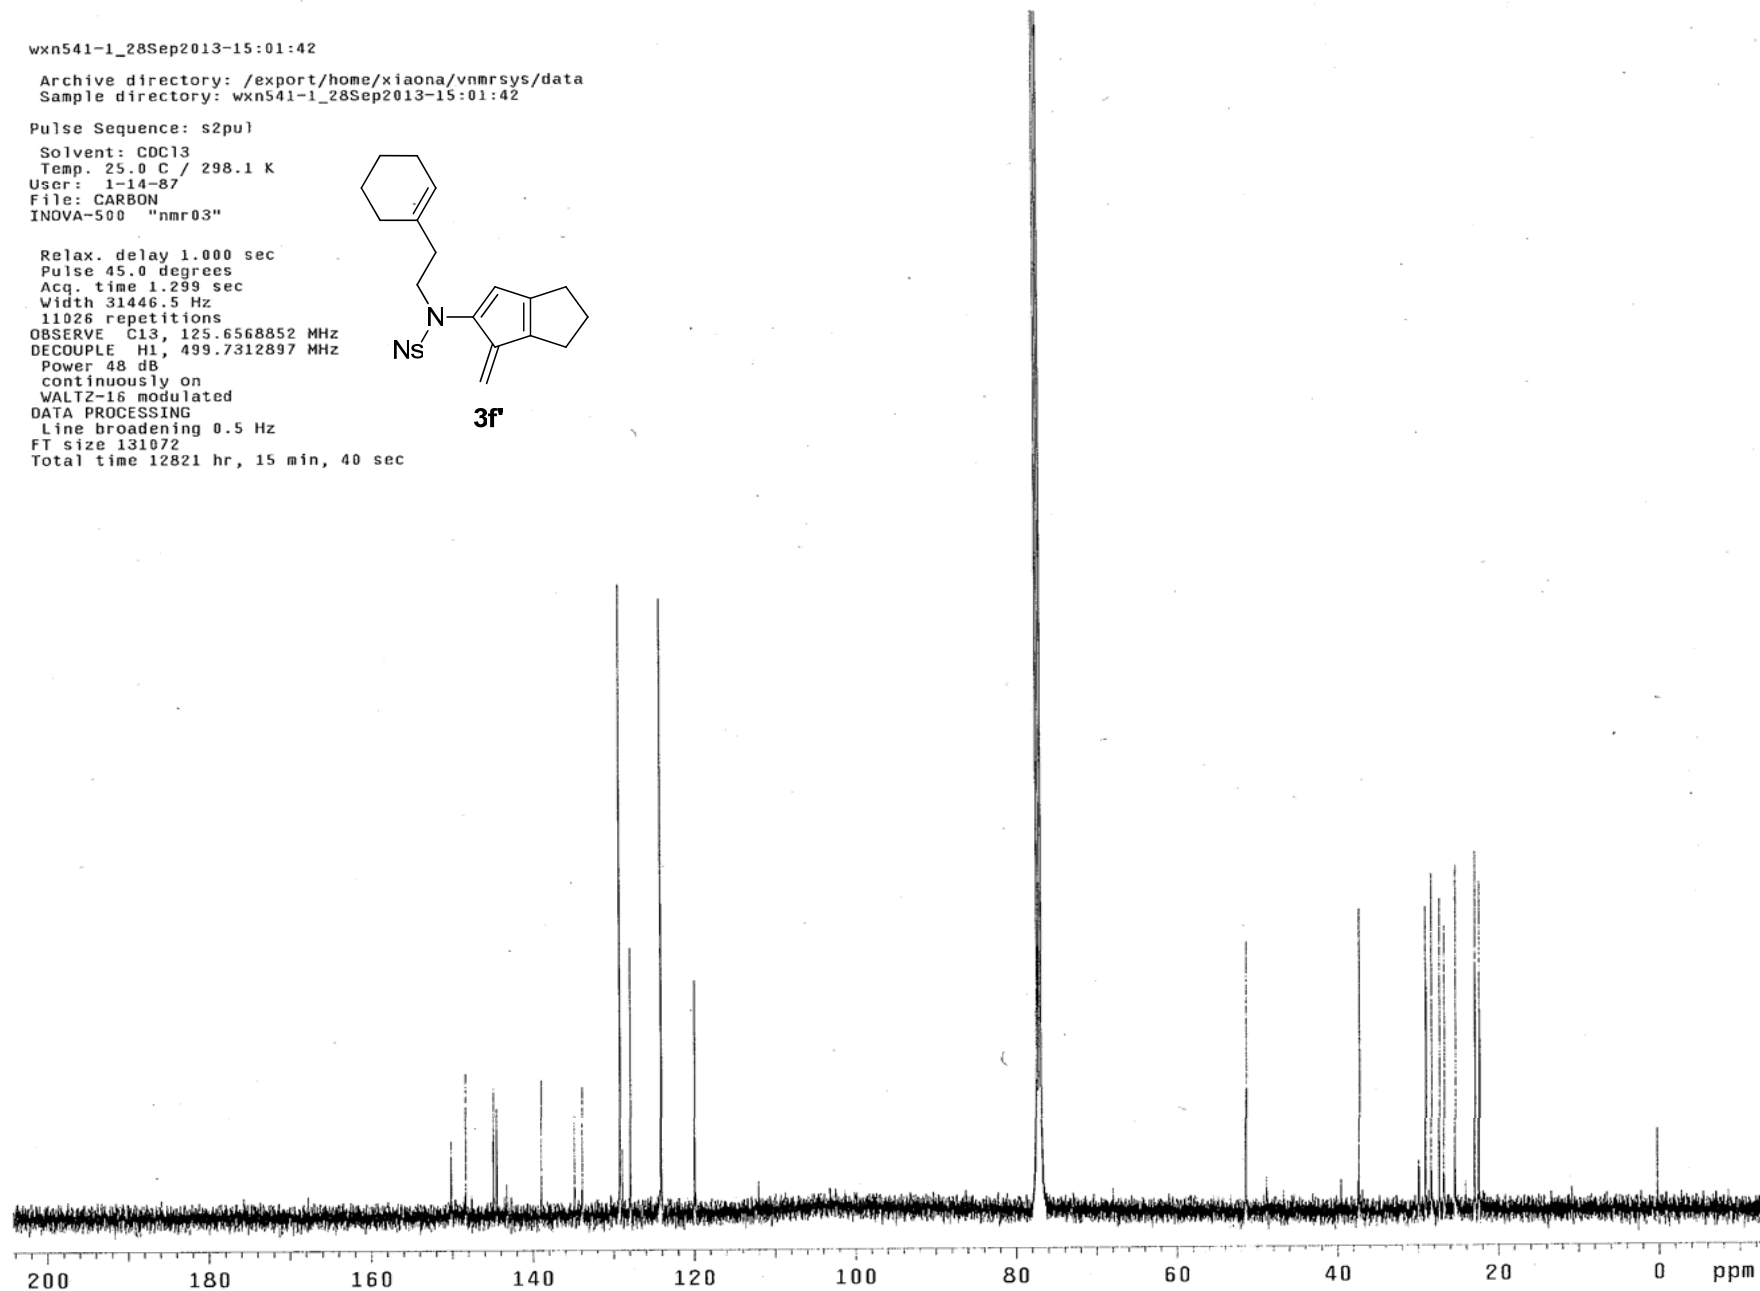

wxn601-2\_27Dec2013

Archive directory: /export/home/xiaona/vnmrsys/data  
Sample directory: wxn601-2\_27Dec2013

Pulse Sequence: s2pu1

Solvent: CDCl3  
Temp. 25.0 C / 298.1 K  
File: PROTON  
INOVA-500 "nmr03"

Relax. delay 1.000 sec  
Pulse 45.0 degrees  
Acq. time 3.754 sec  
Width 6387.7 Hz  
8 repetitions  
OBSERVE H1, 399.7865227 MHz  
DATA PROCESSING  
FT size 65536  
Total time 0 min, 57 sec

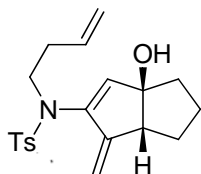

**3g**

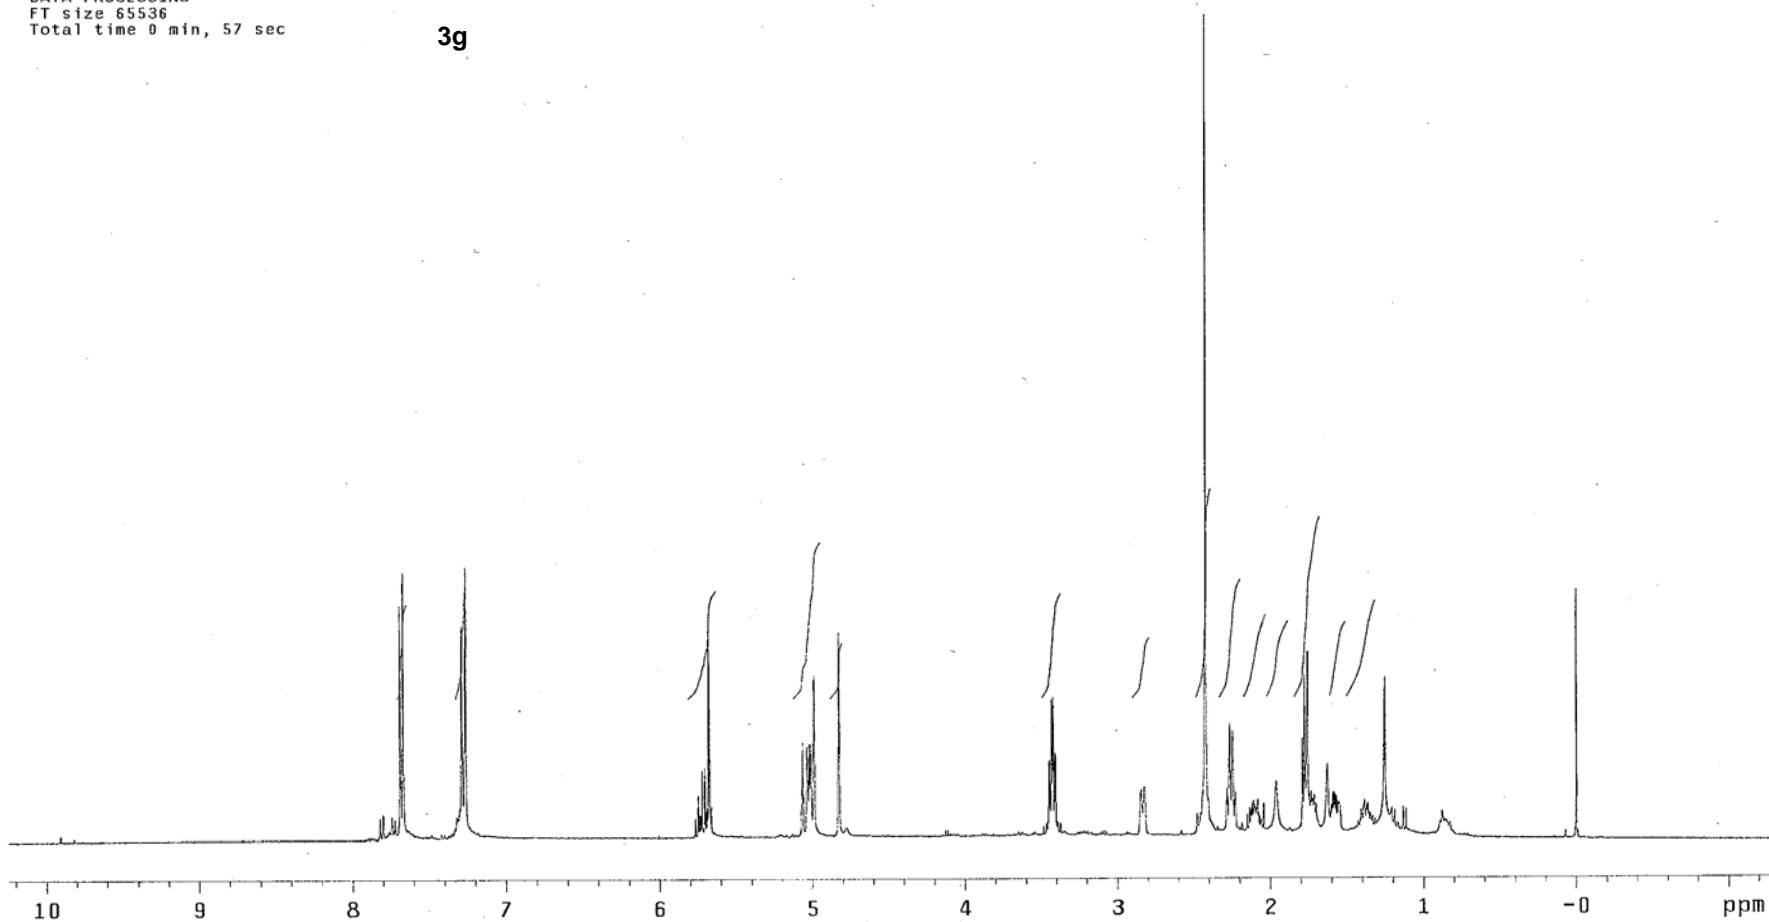



wxn601-2\_27Dec2013-10:21:16

Archive directory: /export/home/xiaona/vnmrsys/data  
Sample directory: wxn601-2\_27Dec2013-10:21:16

Pulse Sequence: s2pul

Solvent: CDCl3  
Temp. 25.0 C / 298.1 K  
File: CARBON  
INNOVA-500 "nmr03"

Relax. delay 1.000 sec  
Pulse 45.0 degrees  
Acq. time 1.197 sec  
Width 25157.2 Hz  
3489 repetitions  
OBSERVE C13, 100.5263821 MHz  
DECOUPLE H1, 399.7885243 MHz  
Power 43 dB  
continuously on  
WALTZ-16 modulated  
DATA PROCESSING  
Line broadening 0.8 Hz  
FT size 65536  
Total time 122 hr, 33 min, 8 sec

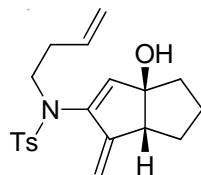

**3g**

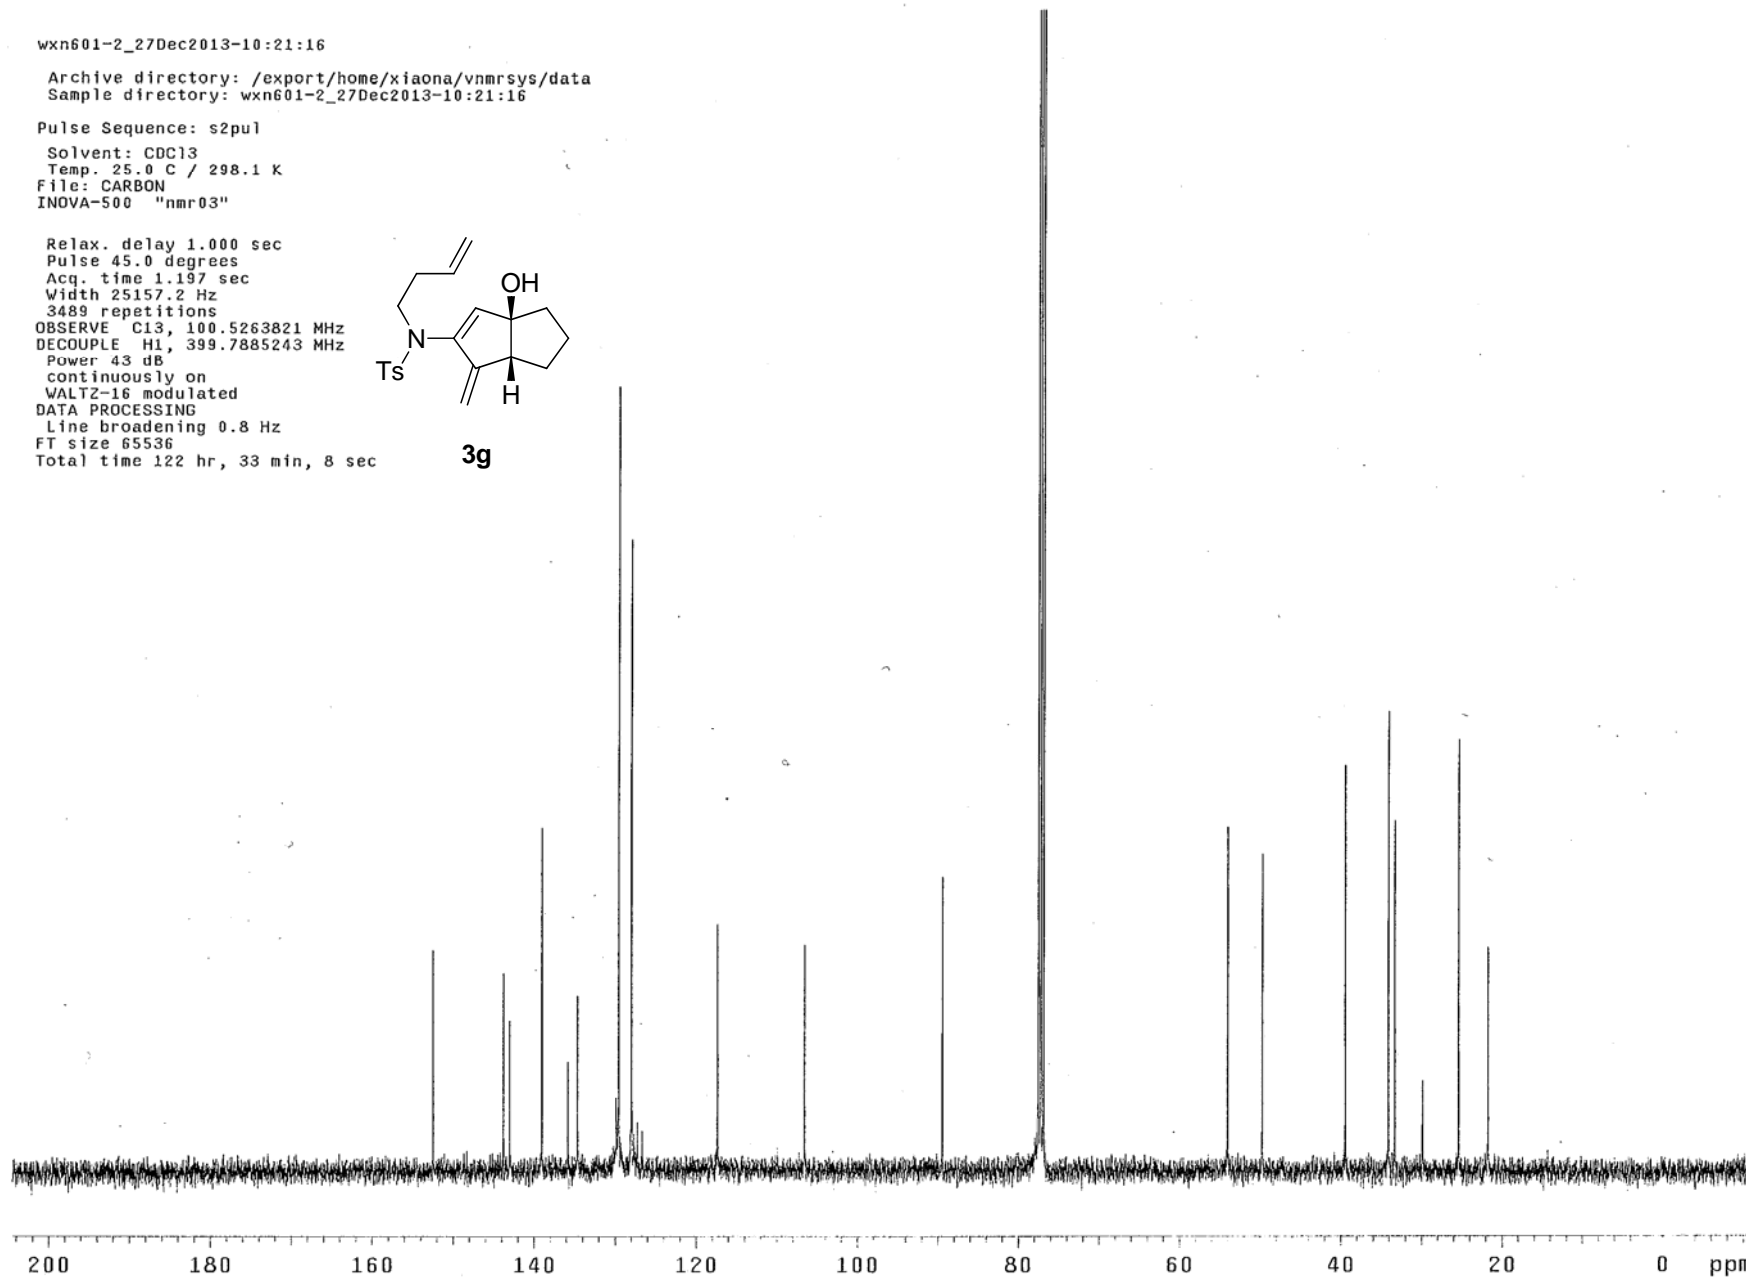

wxn594-601-1\_30Dec2013

Archive directory: /export/home/xiaona/vnmrsys/data  
Sample directory: wxn594-601-1\_30Dec2013

Pulse Sequence: s2pu1

Solvent: CDCl3  
Temp. 25.0 C / 298.1 K  
File: PROTON  
INOVA-500 "nmr03"

Relax. delay 1.000 sec  
Pulse 45.0 degrees  
Acq. time 3.754 sec  
Width 6387.7 Hz  
8 repetitions  
OBSERVE H1, 399.7865227 MHz  
DATA PROCESSING  
FT size 65536  
Total time 0 min, 57 sec

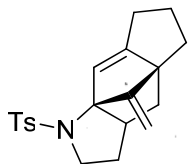

3g"

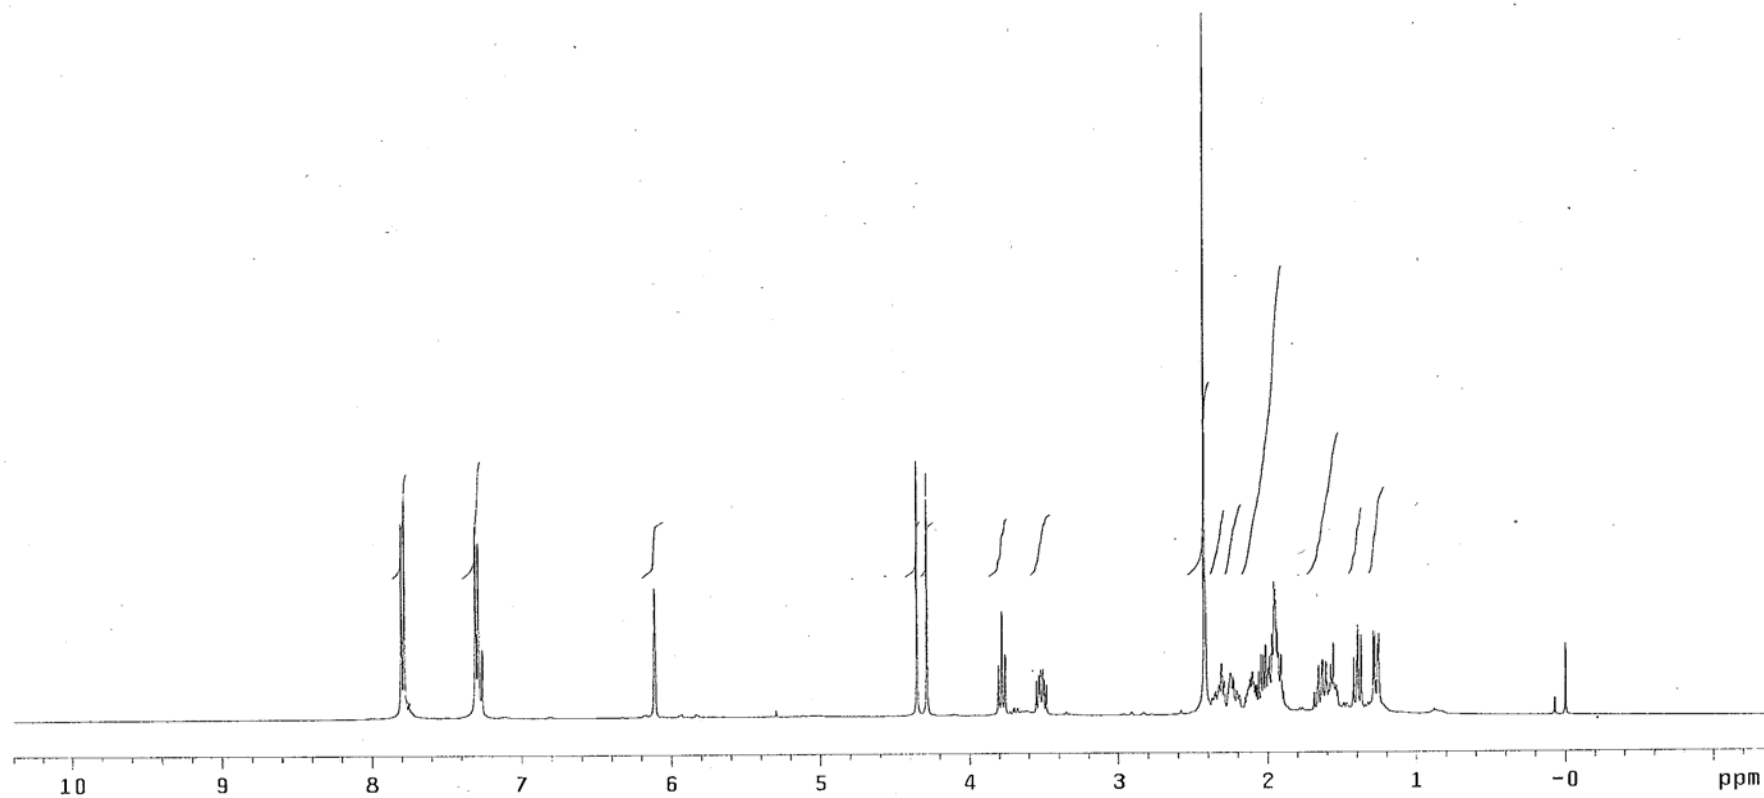

wxn594-601-1\_30Dec2013

Archive directory: /export/home/xiaona/vnmrsys/data  
Sample directory: wxn594-601-1\_30Dec2013

Pulse Sequence: s2pul  
Solvent: CDC13  
Temp. 25.0 C / 298.1 K  
File: CARBON  
INOVA-500 "nmr03"

Relax. delay 1.000 sec  
Pulse 45.0 degrees  
Acq. time 1.197 sec  
Width 25157.2 Hz  
1644 repetitions  
OBSERVE C13, 100.5263837 MHz  
DECOUPLE H1, 399.7885243 MHz  
Power 43 dB  
continuously on  
WALTZ-16 modulated  
DATA PROCESSING  
Line broadening 0.8 Hz  
FT size 65536  
Total time 3 hr, 3 min, 49 sec

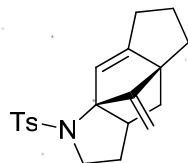

3g"

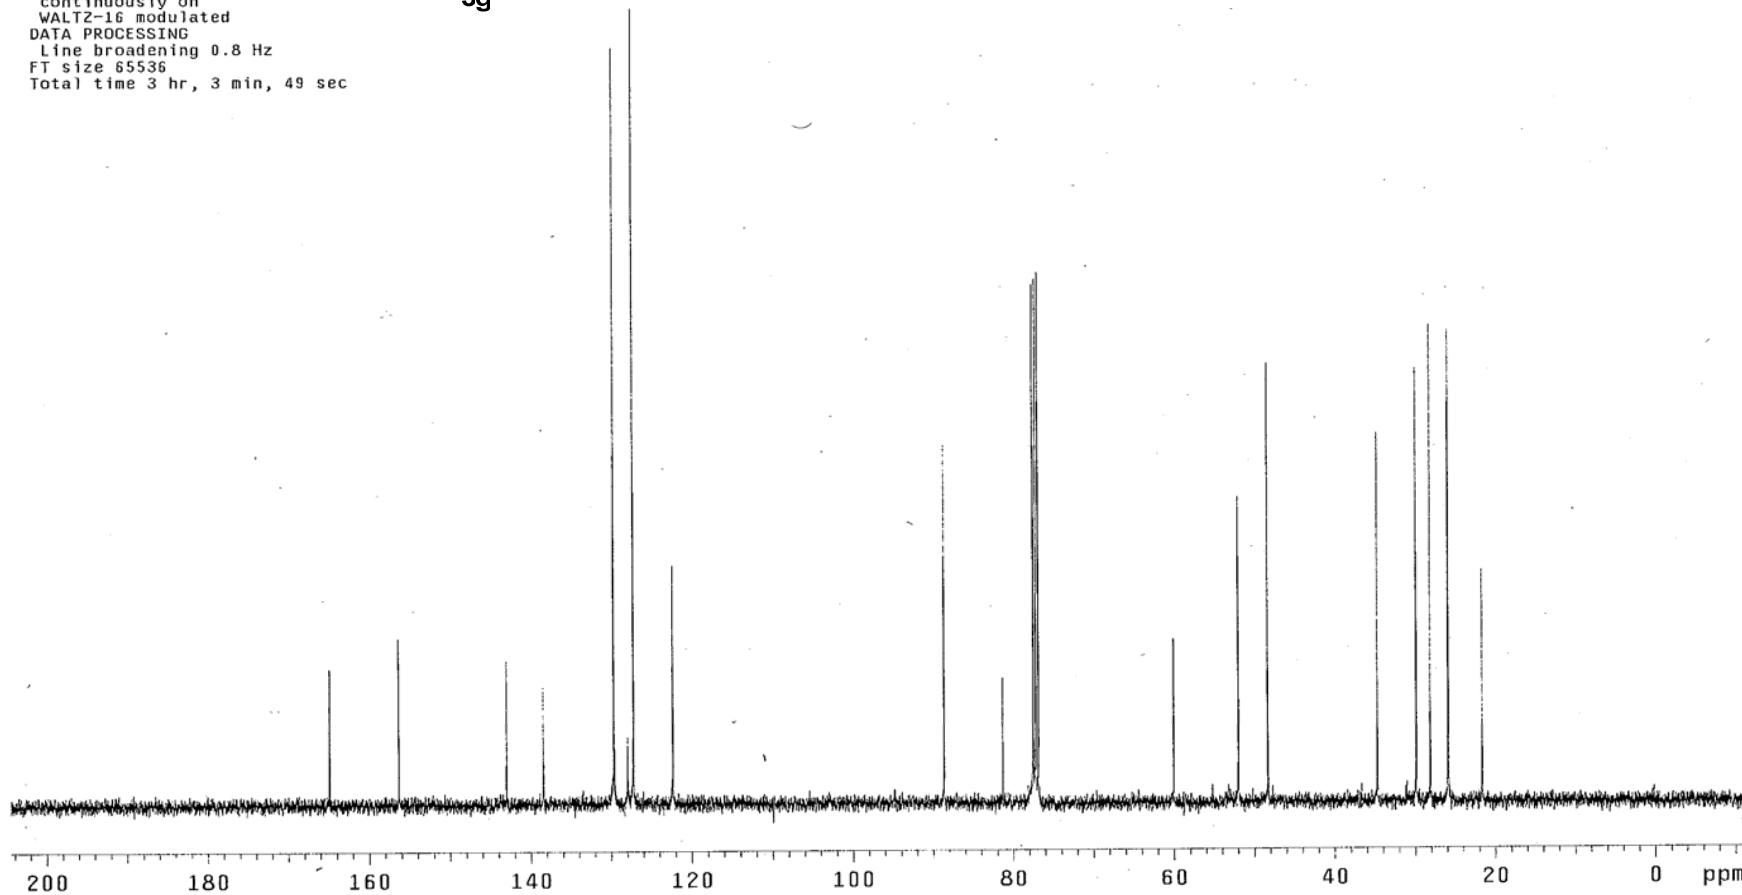

wxn593-4\_16Dec2013

Archive directory: /export/home/xiaona/vnmrsys/data  
Sample directory: wxn593-4\_16Dec2013

Pulse Sequence: s2pul  
Solvent: CDCl3  
Temp. 25.0 C / 298.1 K  
File: PROTON  
INNOVA-500 "nmr03"

Relax. delay 1.000 sec  
Pulse 45.0 degrees  
Acq. time 3.747 sec  
Width 8000.0 Hz  
8 repetitions  
OBSERVE H1, 499.7288165 MHz  
DATA PROCESSING  
Line broadening 0.5 Hz  
FT size 65536  
Total time 0 min, 38 sec

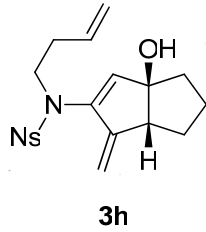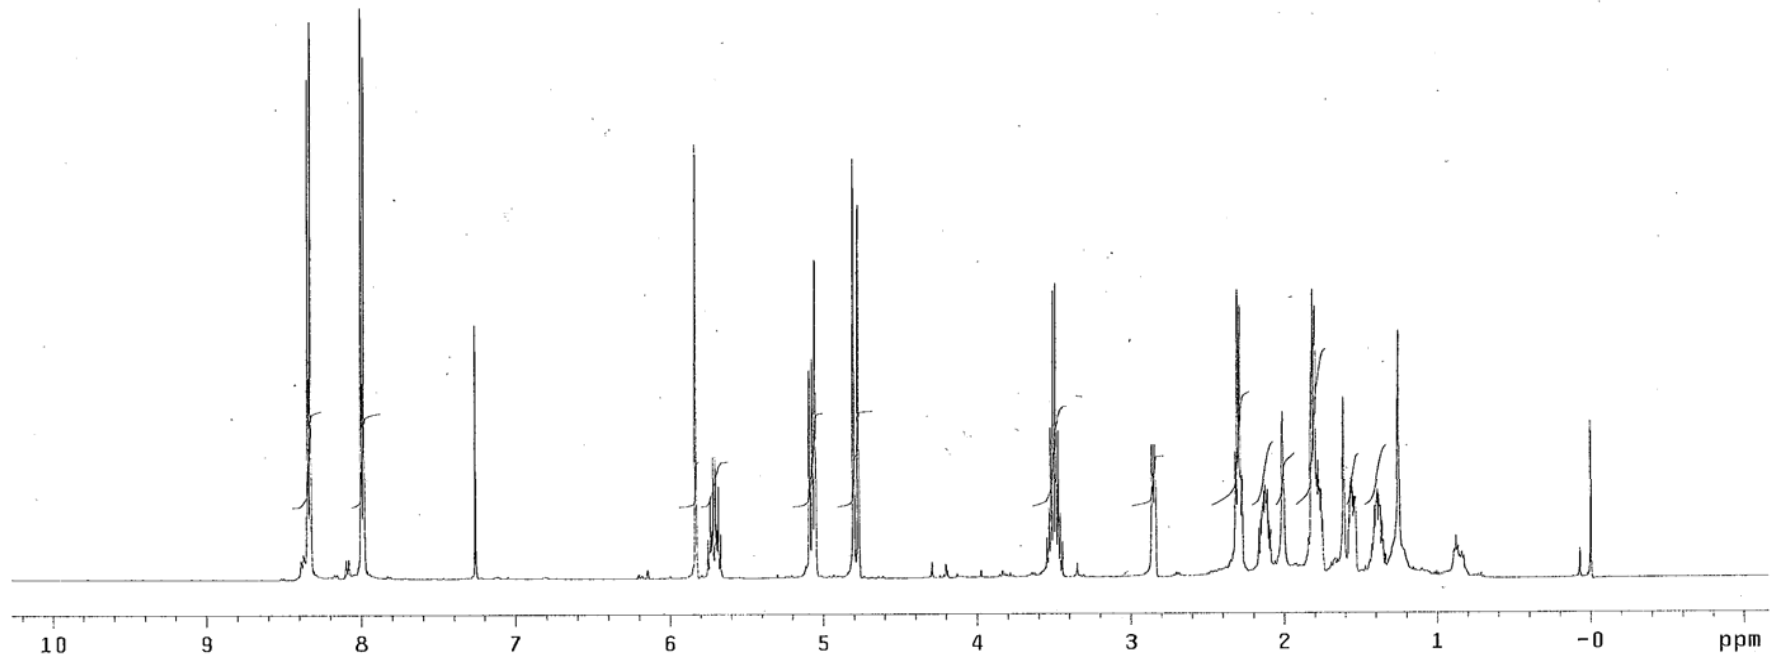

wxn593-4\_15Dec2013

Archive directory: /export/home/xiaona/vnmrsys/data  
Sample directory: wxn593-4\_15Dec2013

Pulse Sequence: s2pul

Solvent: CDC13  
Temp. 25.0 C / 298.1 K  
File: CARBON  
INOVA-500 "nmr03"

Relax. delay 1.000 sec  
Pulse 45.0 degrees  
Acq. time 1.197 sec  
Width 25157.2 Hz  
3998 repetitions  
OBSERVE C13, 100.5263814 MHz  
DECOUPLE H1, 399.7885243 MHz  
Power 43 dB  
continuously on  
WALTZ-16 modulated  
DATA PROCESSING  
Line broadening 0.8 Hz  
FT size 65536  
Total time 3 hr, 3 min, 49 sec

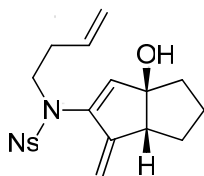

3h

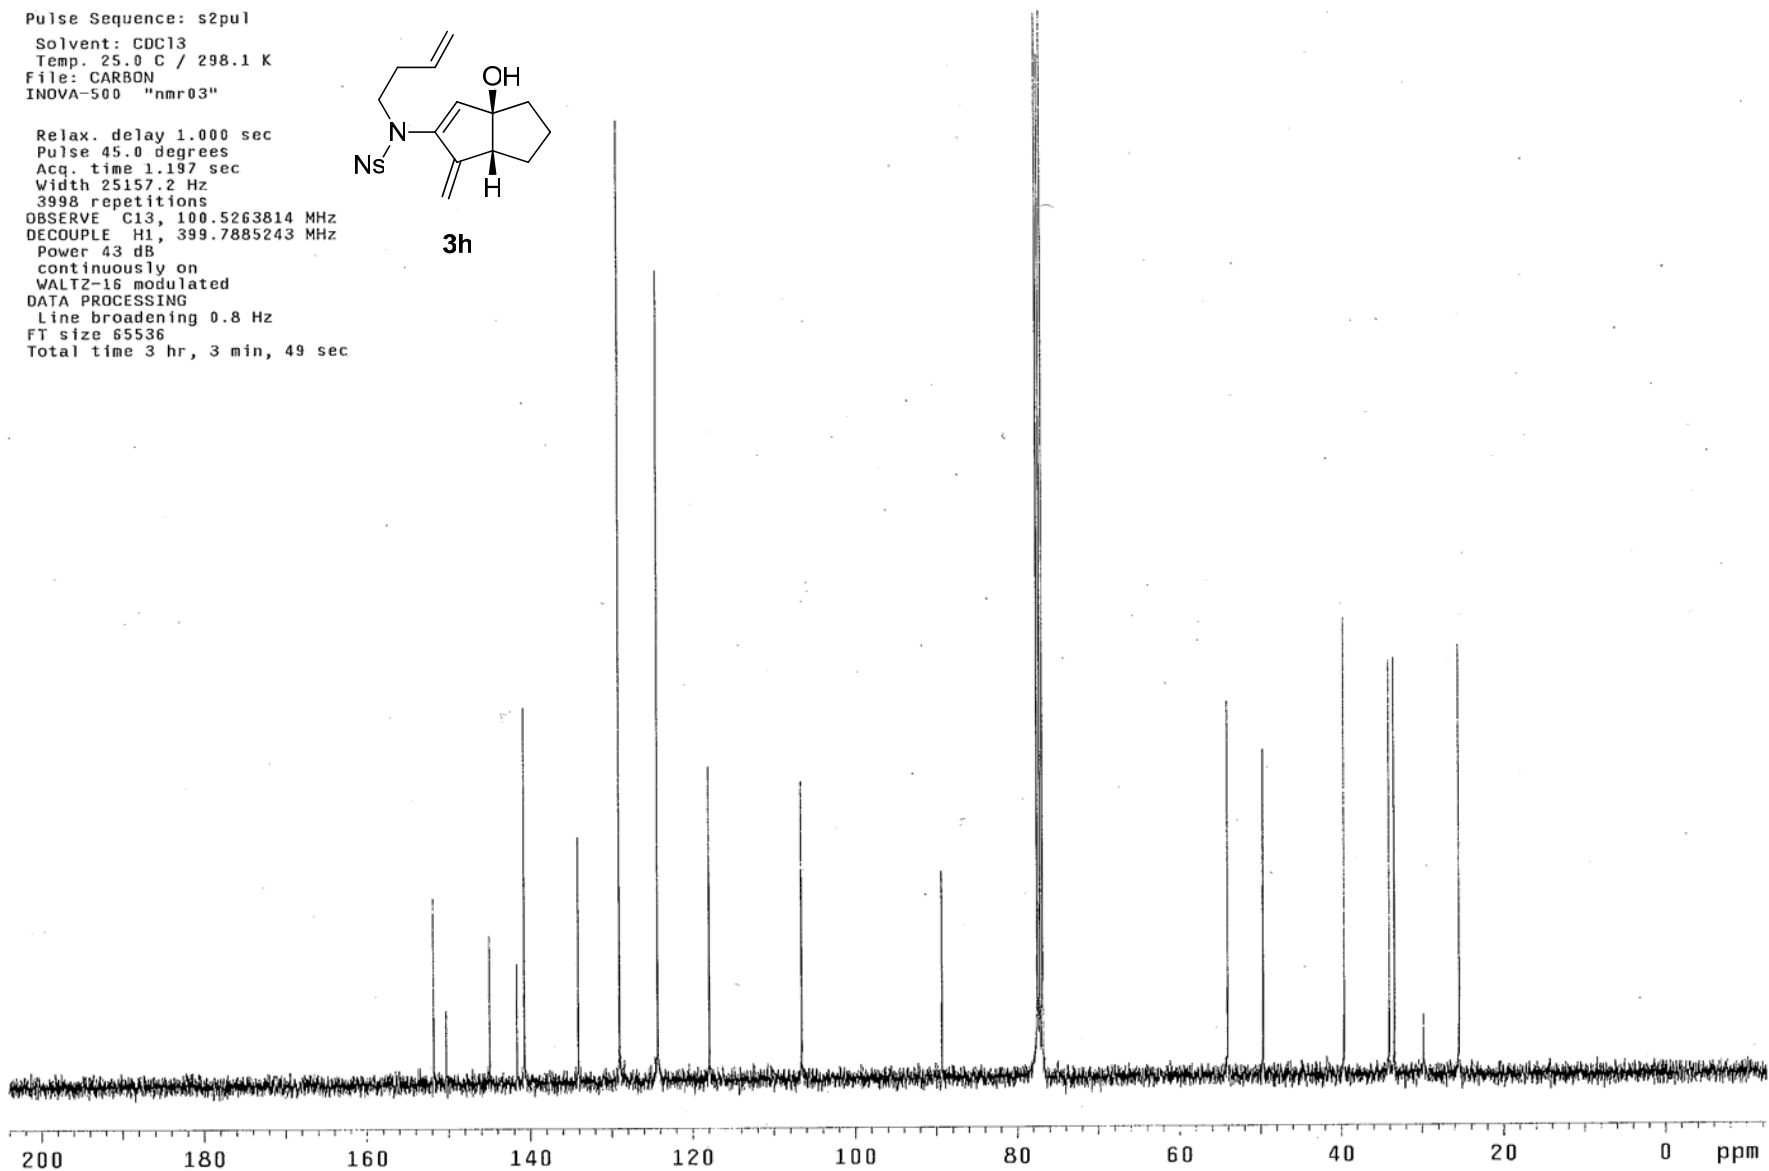

wxn593-1\_15Dec2013-19:40:02

Archive directory: /export/home/xiaona/vnmrsys/data  
Sample directory: wxn593-1\_15Dec2013-19:40:02

Pulse Sequence: s2pul

Solvent: CDCl3  
Temp. 25.0 C / 298.1 K  
File: PROTON  
INNOVA-500 "nmr03"

Relax. delay 1.000 sec  
Pulse 45.0 degrees  
Acq. time 3.747 sec  
Width 8000.0 Hz  
& repetitions  
OBSERVE H1, 499.7288175 MHz  
DATA PROCESSING  
Line broadening 0.5 Hz  
FT size 65536  
Total time 0 min, 38 sec

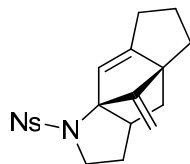

3h''

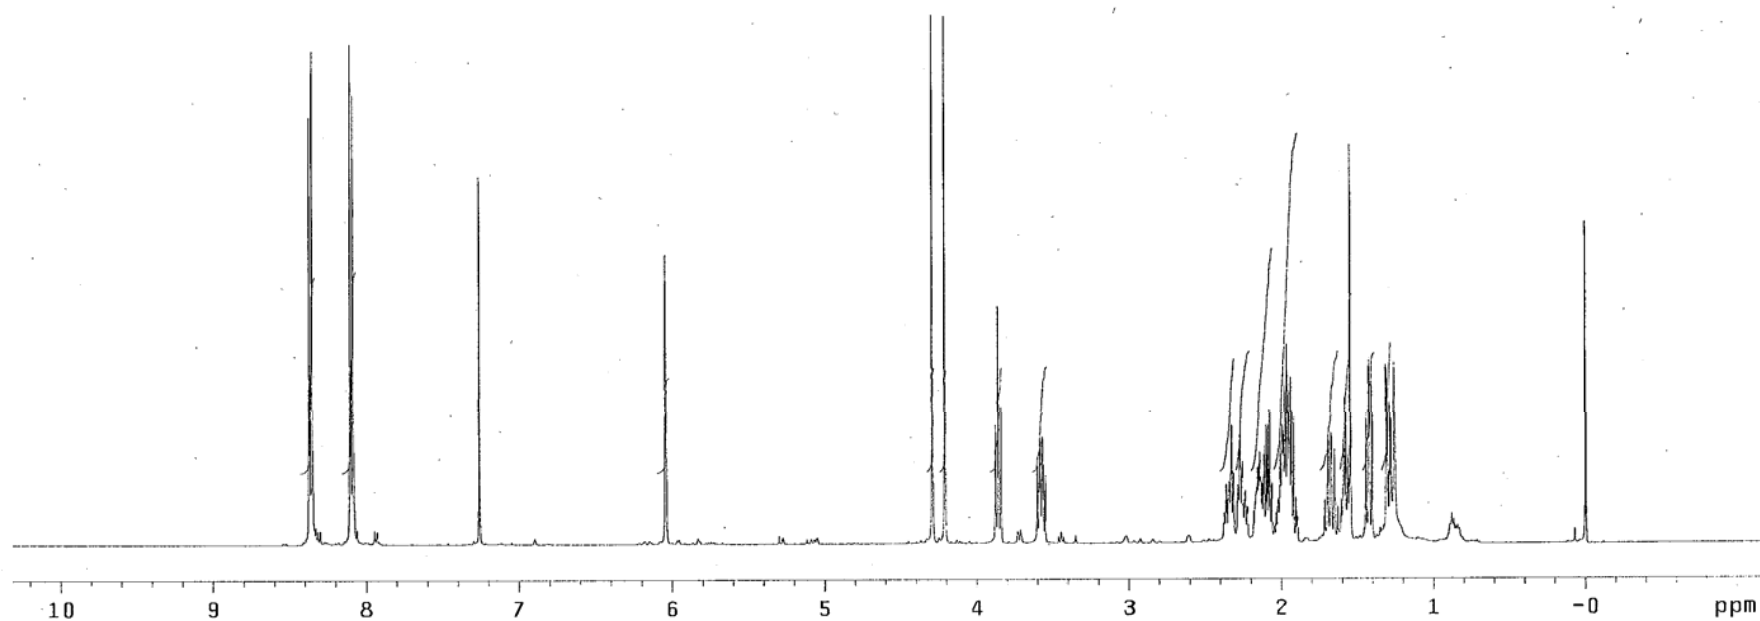

wxn593-1\_15Dec2013-21:48:11

Archive directory: /export/home/xiaona/vnmrsys/data  
Sample directory: wxn593-1\_15Dec2013-21:48:11

Pulse Sequence: s2pul

Solvent: CDCl3  
Temp. 25.0 C / 298.1 K  
File: CARBON  
INNOVA-500 "nmr03"

Relax. delay 1.000 sec  
Pulse 45.0 degrees  
Acq. time 1.197 sec  
Width 25157.2 Hz  
18633 repetitions  
OBSERVE C13, 100.5263814 MHz  
DECOUPLE H1, 399.7885243 MHz  
Power 43 dB  
continuously on  
WALTZ-16 modulated  
DATA PROCESSING  
Line broadening 0.8 Hz  
FT size 65536  
Total time 12 hr, 15 min, 18 sec

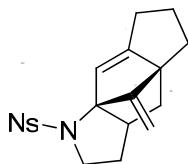

3h"

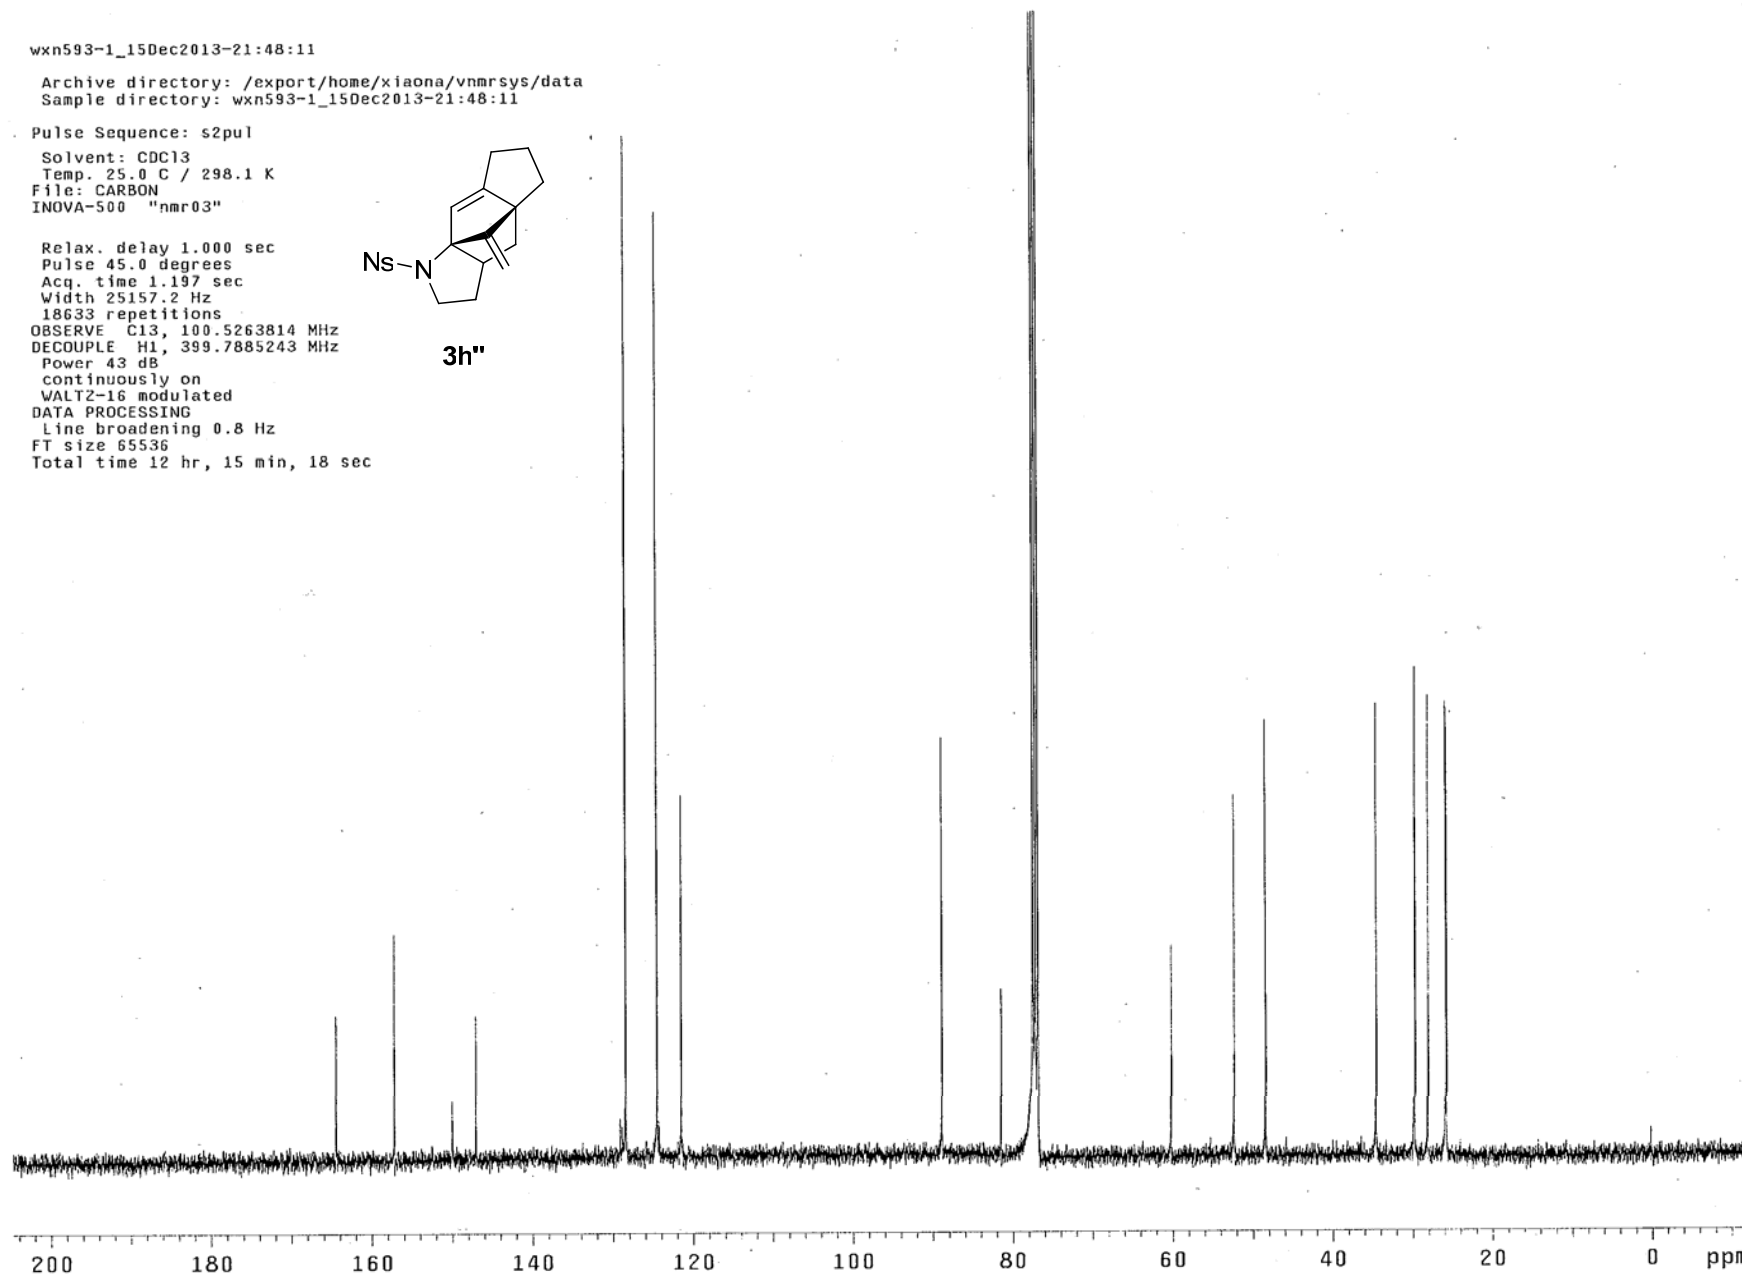

wxn528-4\_17Sep2013

Archive directory: /export/home/xiaona/vnmrsys/data  
Sample directory: wxn528-4\_17Sep2013

Pulse Sequence: s2pu1

Solvent: CDCl3  
Temp. 25.0 C / 298.1 K  
File: PROTON  
INOVA-500 "nmr03"

Relax. delay 1.000 sec  
Pulse 45.0 degrees  
Acq. time 3.747 sec  
Width 8000.0 Hz  
8 repetitions  
OBSERVE H1, 499.7288139 MHz  
DATA PROCESSING  
Line broadening 0.5 Hz  
FT size 65536  
Total time 0 min, 38 sec

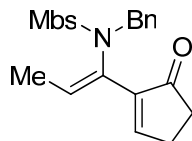

**12a-cis**

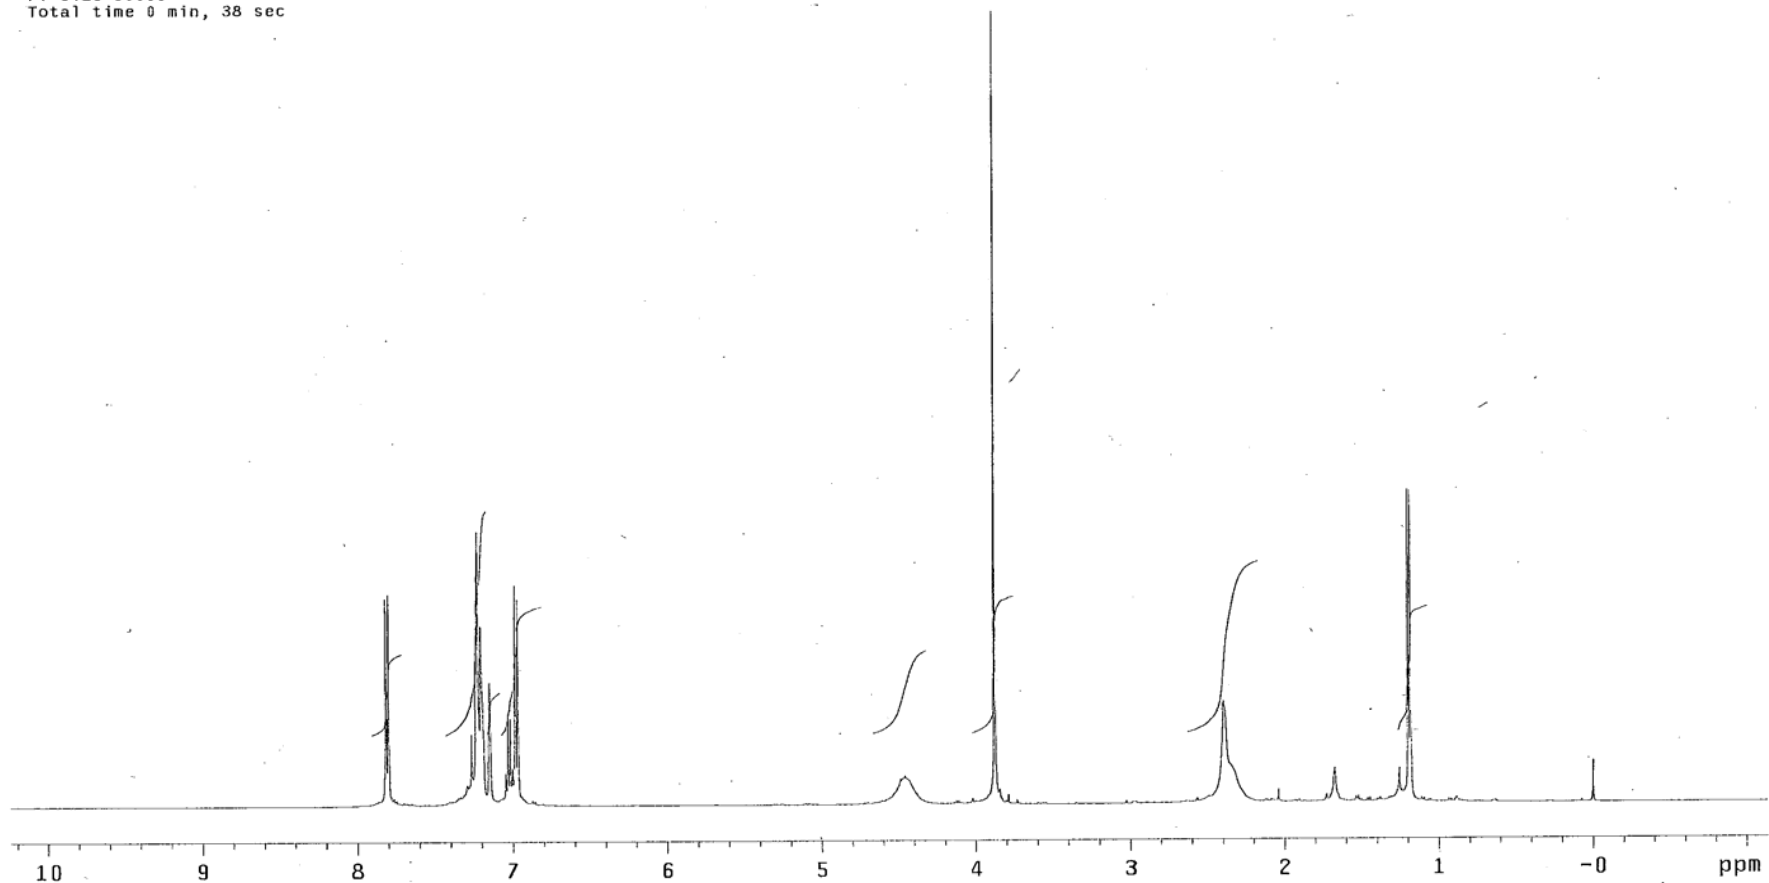



wxn528-4\_17Sep2013

Archive directory: /export/home/xiaona/vnmrsys/data  
Sample directory: wxn528-4\_17Sep2013

Pulse Sequence: s2pu1

Solvent: CDCl3  
Temp. 25.0 C / 298.1 K  
User: 1-14-87  
File: CARBON  
INNOVA-500 "nmr03"

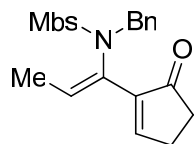

12a-cis

Relax. delay 1.000 sec  
Pulse 45.0 degrees  
Acq. time 1.299 sec  
Width 31446.5 Hz  
579 repetitions  
OBSERVE C13, 125.6568910 MHz  
DECOUPLE H1, 499.7312897 MHz  
Power 39 dB  
continuously on  
WALTZ-16 modulated  
DATA PROCESSING  
Line broadening 0.5 Hz  
FT size 131072  
Total time 1 hr, 17 min, 0 sec

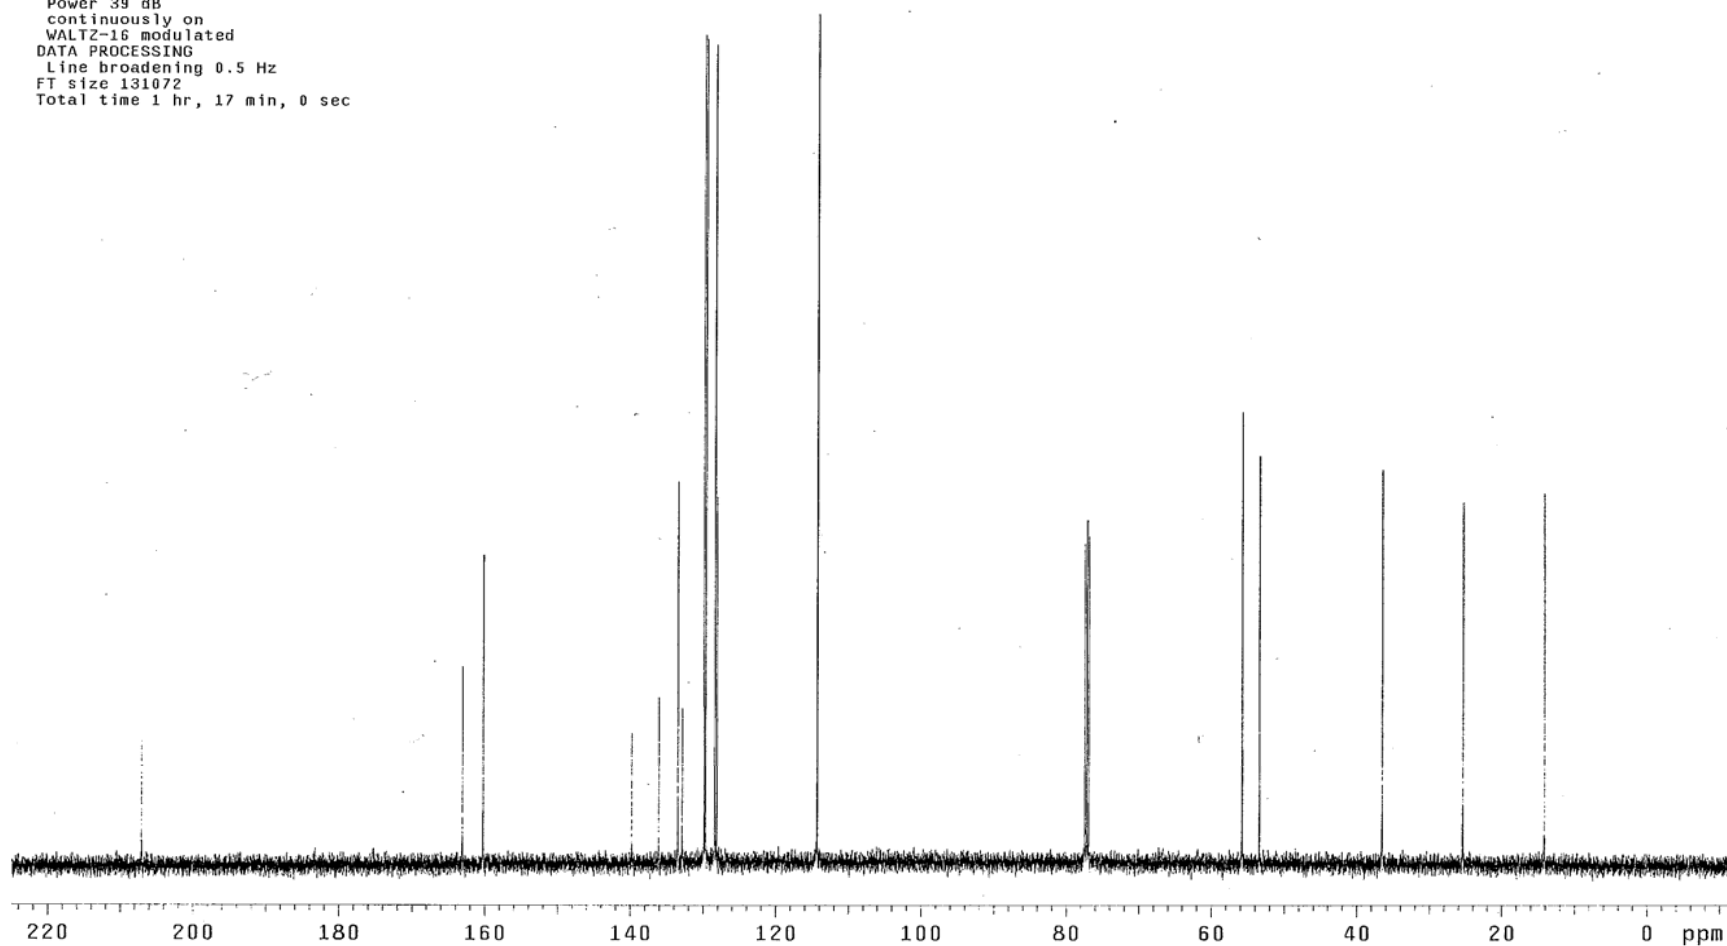

wxn638-1-2-3\_01Mar2014-19:32:38

Archive directory: /export/home/xiaona/vnmrsys/data  
Sample directory: wxn638-1-2-3\_01Mar2014-19:32:38

Pulse Sequence: s2pul  
Solvent: CDCl3  
Temp. 25.0 C / 298.1 K  
File: PROTON  
INNOVA-500 "nmr03"

Relax. delay 1.000 sec  
Pulse 45.0 degrees  
Acq. time 3.754 sec  
Width 6387.7 Hz  
8 repetitions  
OBSERVE H1, 399.7865224 MHz  
DATA PROCESSING  
FT size 65536  
Total time 0 min, 57 sec

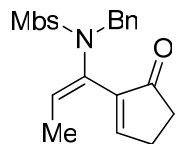

**12a-trans**

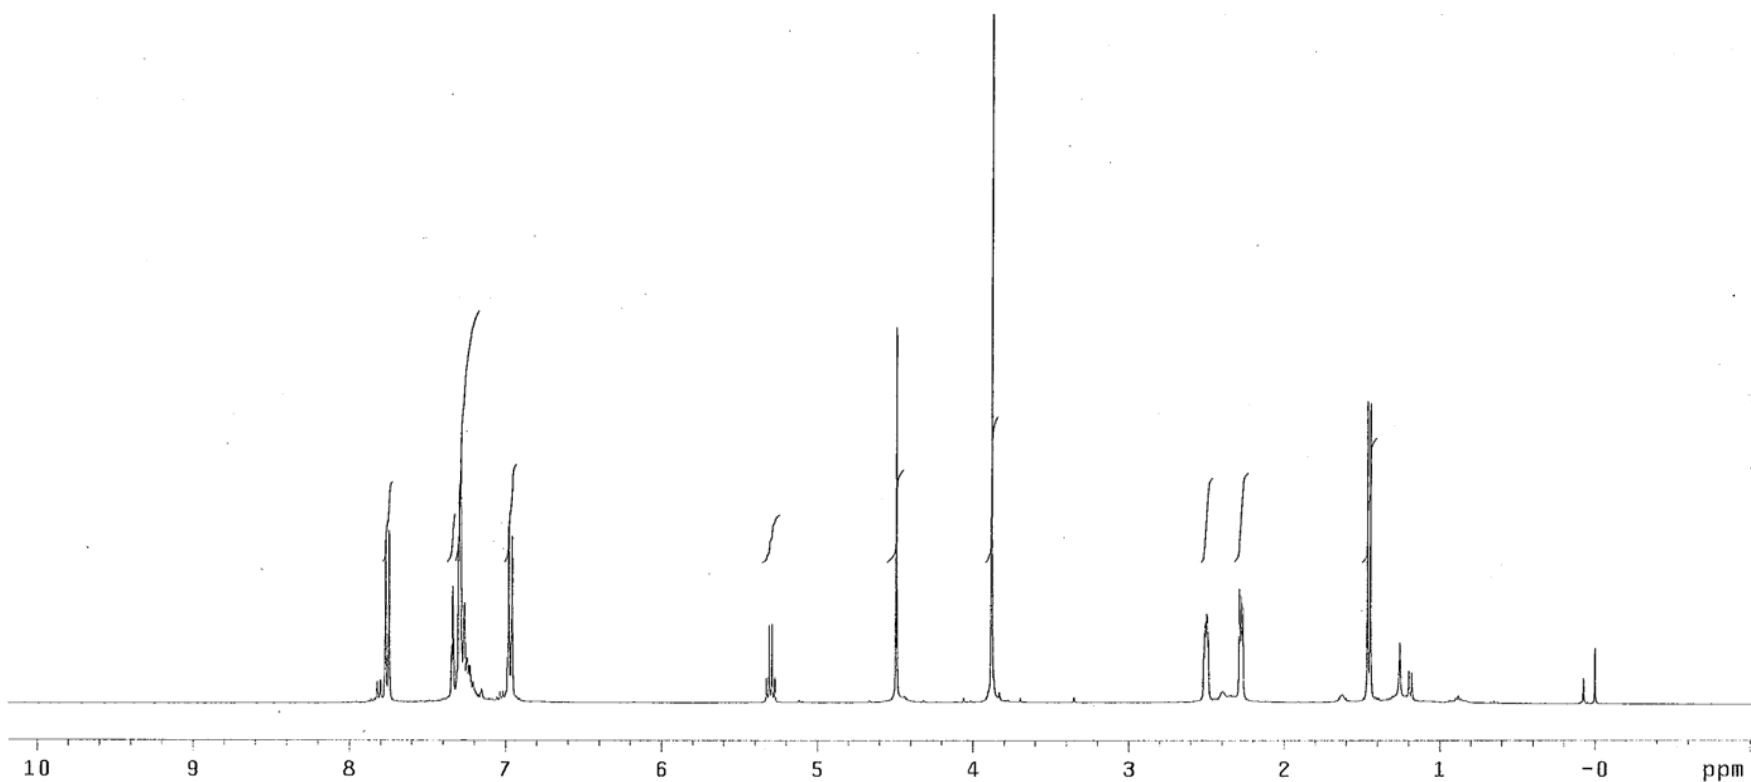

wxn638-1-2-3\_01Mar2014-19:32:38

Archive directory: /export/home/xiaona/vnmrsys/data  
Sample directory: wxn638-1-2-3\_01Mar2014-19:32:38

Pulse Sequence: s2pul  
Solvent: CDCl3  
Temp. 25.0 C / 298.1 K  
File: CARBON  
INOVA-500 "nmr03"

Relax. delay 1.000 sec  
Pulse 45.0 degrees  
Acq. time 1.197 sec  
Width 25157.2 Hz  
2555 repetitions  
OBSERVE C13, 100.5263837 MHz  
DECOUPLE H1, 399.7885243 MHz  
Power 43 dB  
continuously on  
WALTZ-16 modulated  
DATA PROCESSING  
Line broadening 0.8 Hz  
FT size 65536  
Total time 3 hr, 3 min, 49 sec

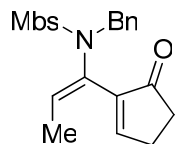

**12a-trans**

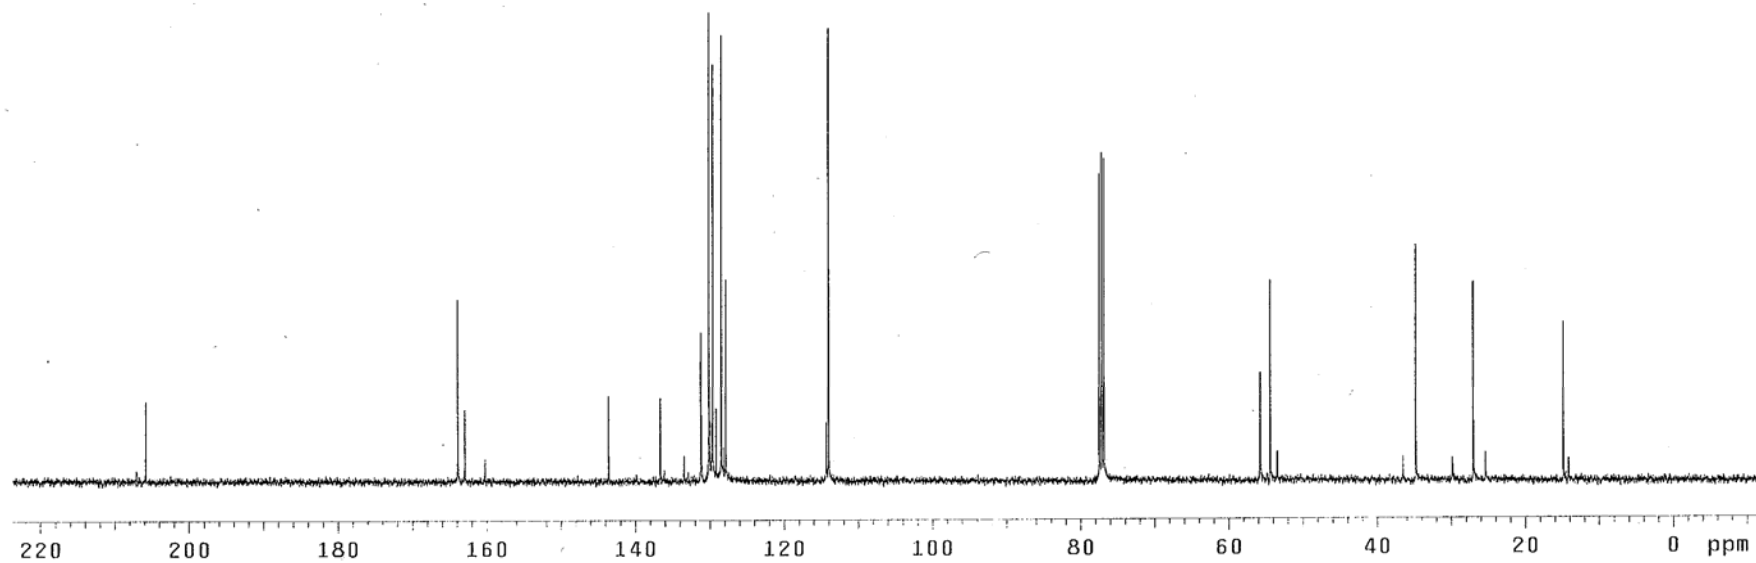

wxn563-1\_30Oct2013

Archive directory: /export/home/xiaona/vnmrsys/data  
Sample directory: wxn563-1\_30Oct2013

Pulse Sequence: s2pu1

Solvent: CDCl<sub>3</sub>  
Temp. 25.0 C / 298.1 K  
File: PROTON  
INNOVA-500 "nmr03"

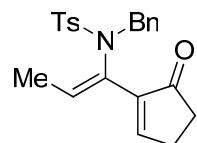

12b-cis

Relax. delay 1.000 sec  
Pulse 45.0 degrees  
Acq. time 3.754 sec  
Width 6387.7 Hz  
8 repetitions  
OBSERVE H1, 399.7865220 MHz  
DATA PROCESSING  
FT size 65536  
Total time 0 min, 57 sec

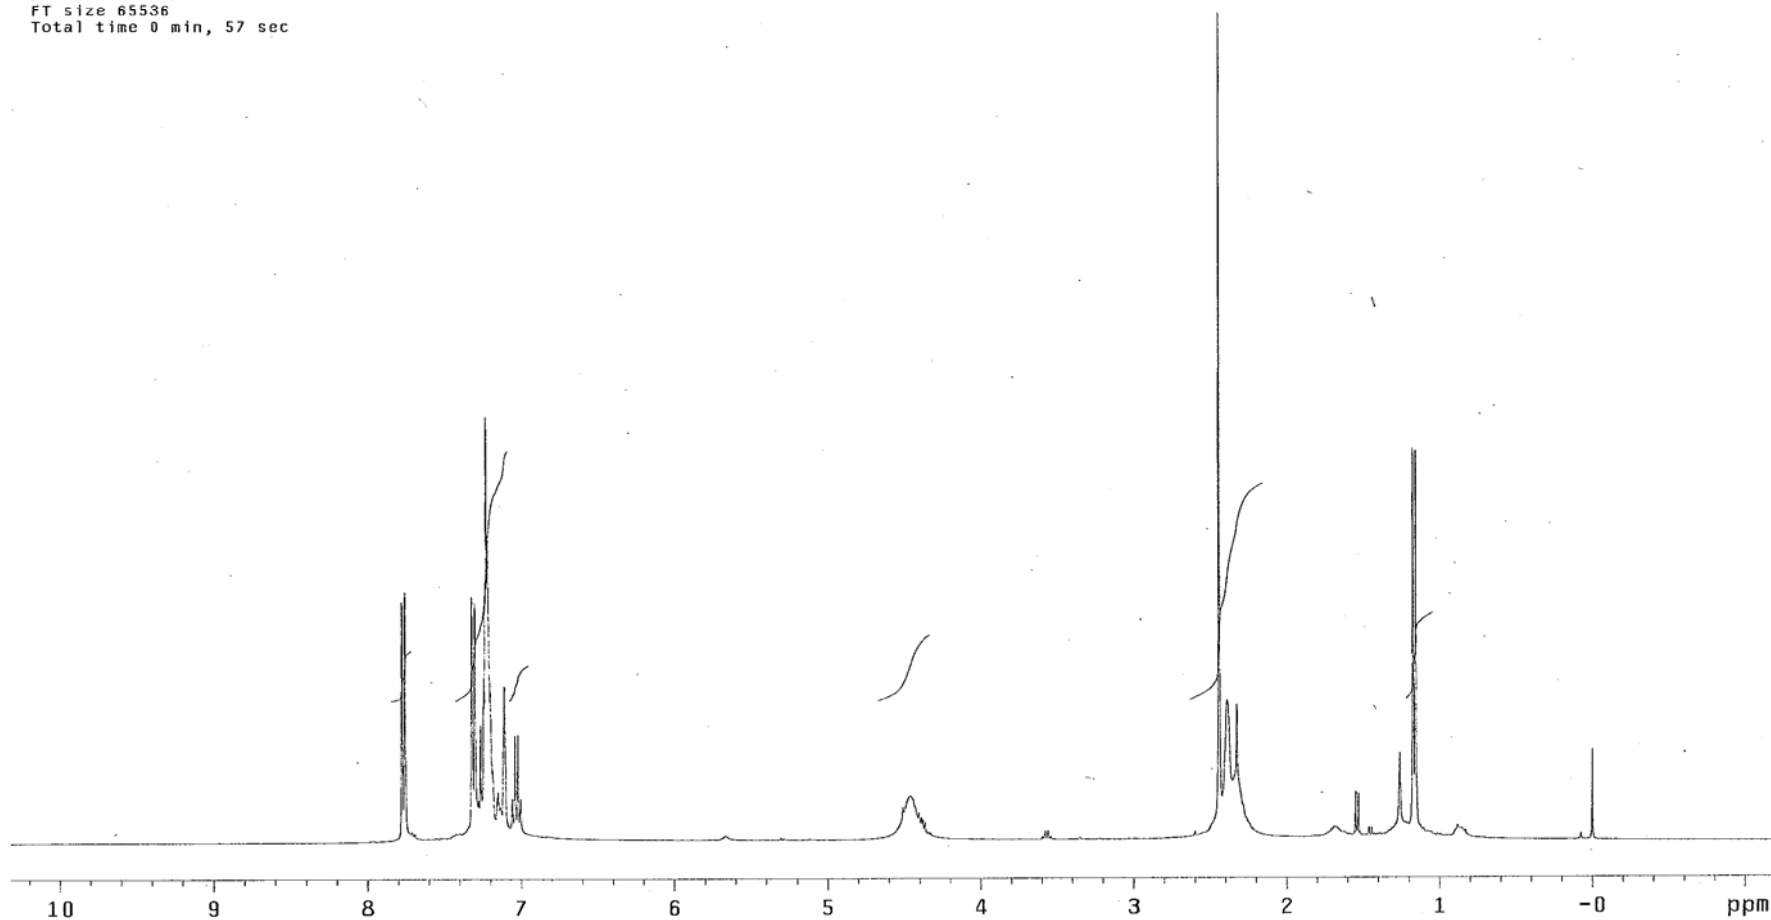

wxn563-1\_28Oct2013

Archive directory: /export/home/xiaona/vnmrsys/data  
Sample directory: wxn563-1\_28Oct2013

Pulse Sequence: s2pul  
Solvent: CDCl3  
Temp. 25.0 C / 298.1 K  
File: CARBON  
INOVA-500 "nmr03"

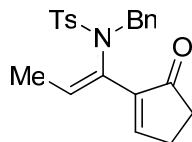

**12b-cis**

Relax. delay 1.000 sec  
Pulse 45.0 degrees  
Acq. time 1.197 sec  
Width 25157.2 Hz  
1186 repetitions  
OBSERVE C13, 100.5263844 MHz  
DECOUPLE H1, 399.7885243 MHz  
Power 43 dB  
continuously on  
WALTZ-16 modulated  
DATA PROCESSING  
Line broadening 0.8 Hz  
FT size 65536  
Total time 3 hr, 3 min, 49 sec

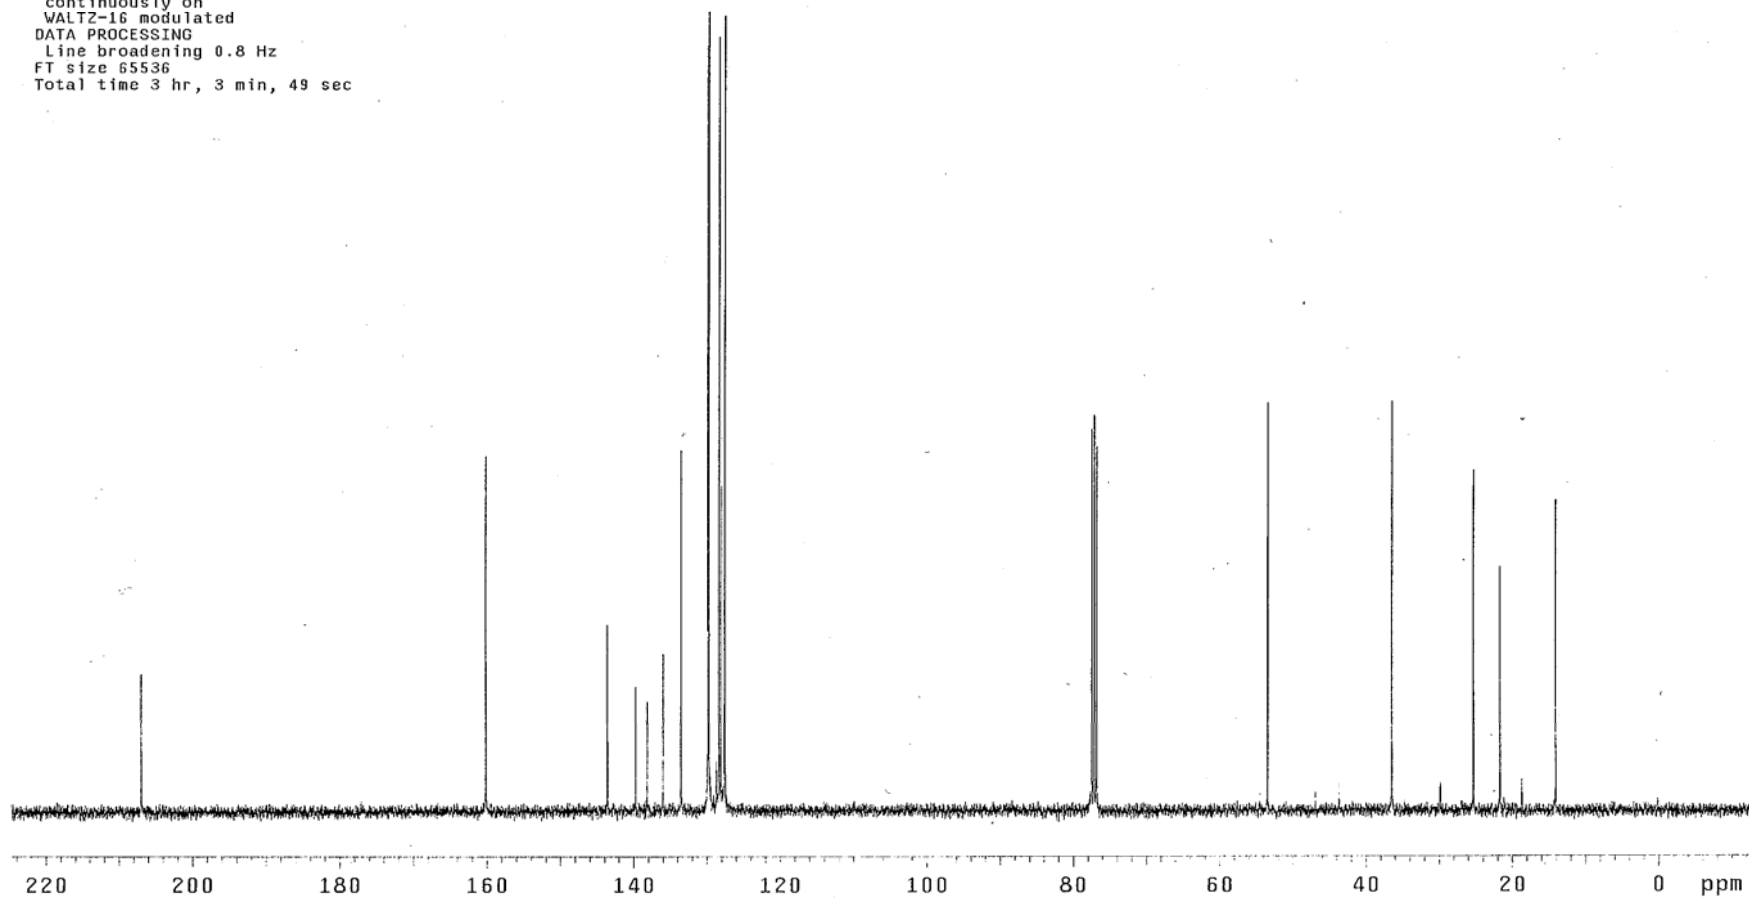

wxn563-2-2\_25Nov2013

Archive directory: /export/home/xiaona/vnmrsys/data  
Sample directory: wxn563-2-2\_25Nov2013

Pulse Sequence: s2pu1

Solvent: CDCl3  
Temp. 25.0 C / 298.1 K  
File: PROTON  
INOVA-500 "nmr03"

Relax. delay 1.000 sec  
Pulse 45.0 degrees  
Acq. time 3.754 sec  
Width 6387.7 Hz  
8 repetitions  
OBSERVE H1, 399.7865233 MHz  
DATA PROCESSING  
FT size 65536  
Total time 0 min, 57 sec

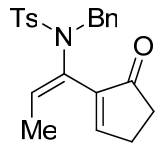

**12b-trans**

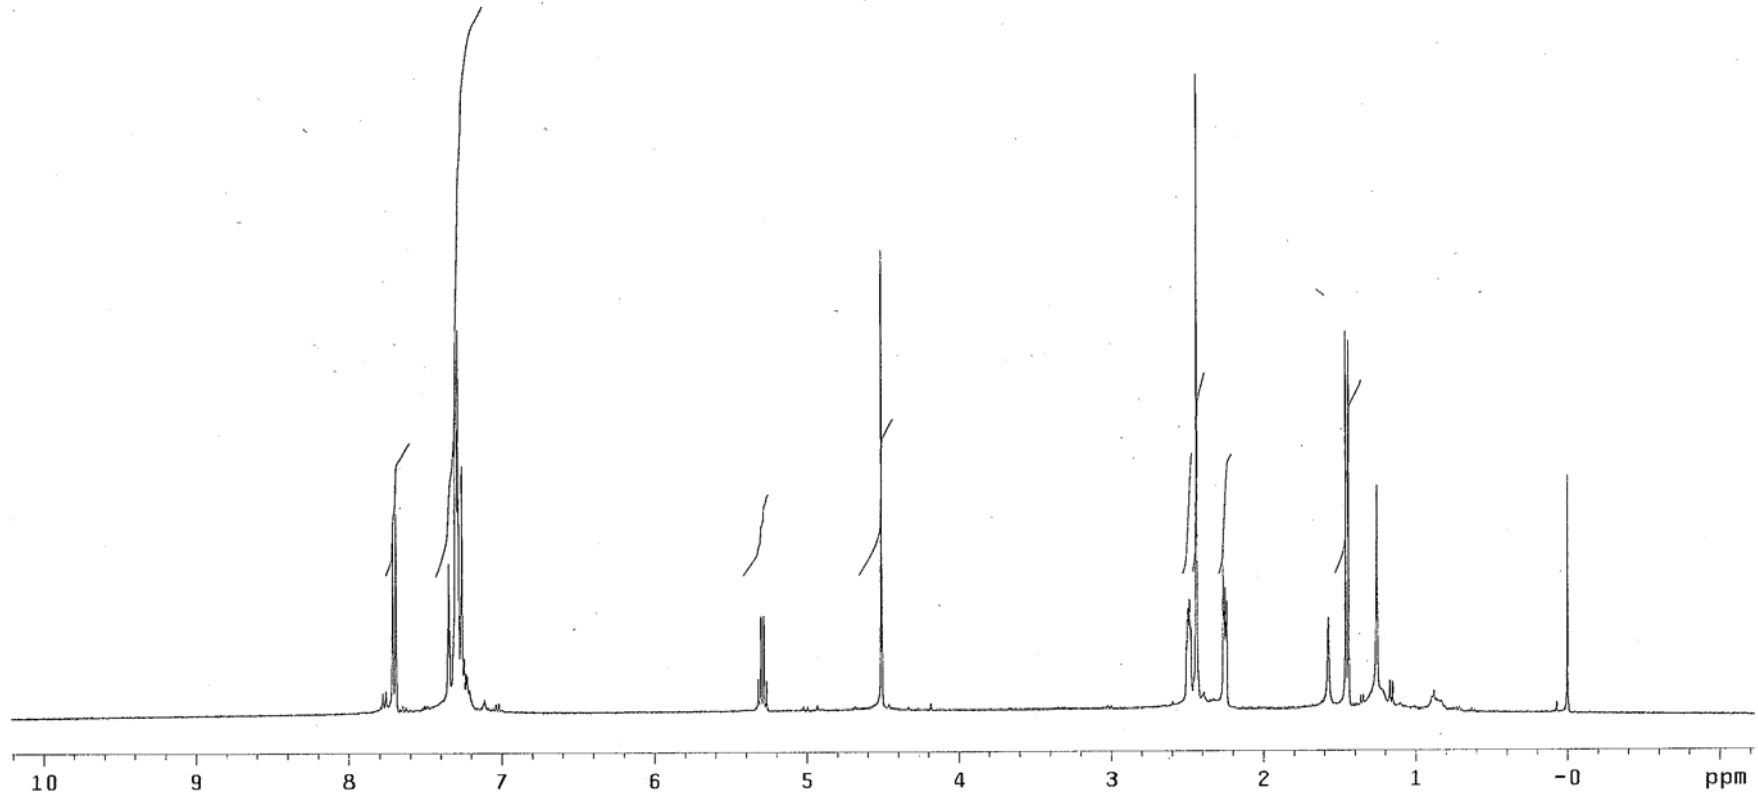

wxn563-2-2\_25Nov2013-16:42:23

Archive directory: /export/home/xiaona/vnmrsys/data  
Sample directory: wxn563-2-2\_25Nov2013-16:42:23

Pulse Sequence: s2pul  
Solvent: CDCl3  
Temp. 25.0 C / 298.1 K  
File: CARBON  
INDVA-500 "nmr03"

Relax. delay 1.000 sec  
Pulse 45.0 degrees  
Acq. time 1.197 sec  
Width 25157.2 Hz  
4588 repetitions  
OBSERVE C13, 100.5263821 MHz  
DECOUPLE H1, 399.7885243 MHz  
Power 43 dB  
continuously on  
WALTZ-16 modulated  
DATA PROCESSING  
Line broadening 0.8 Hz  
FT size 65536  
Total time 3 hr, 3 min, 49 sec

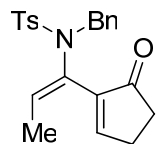

**12b-trans**

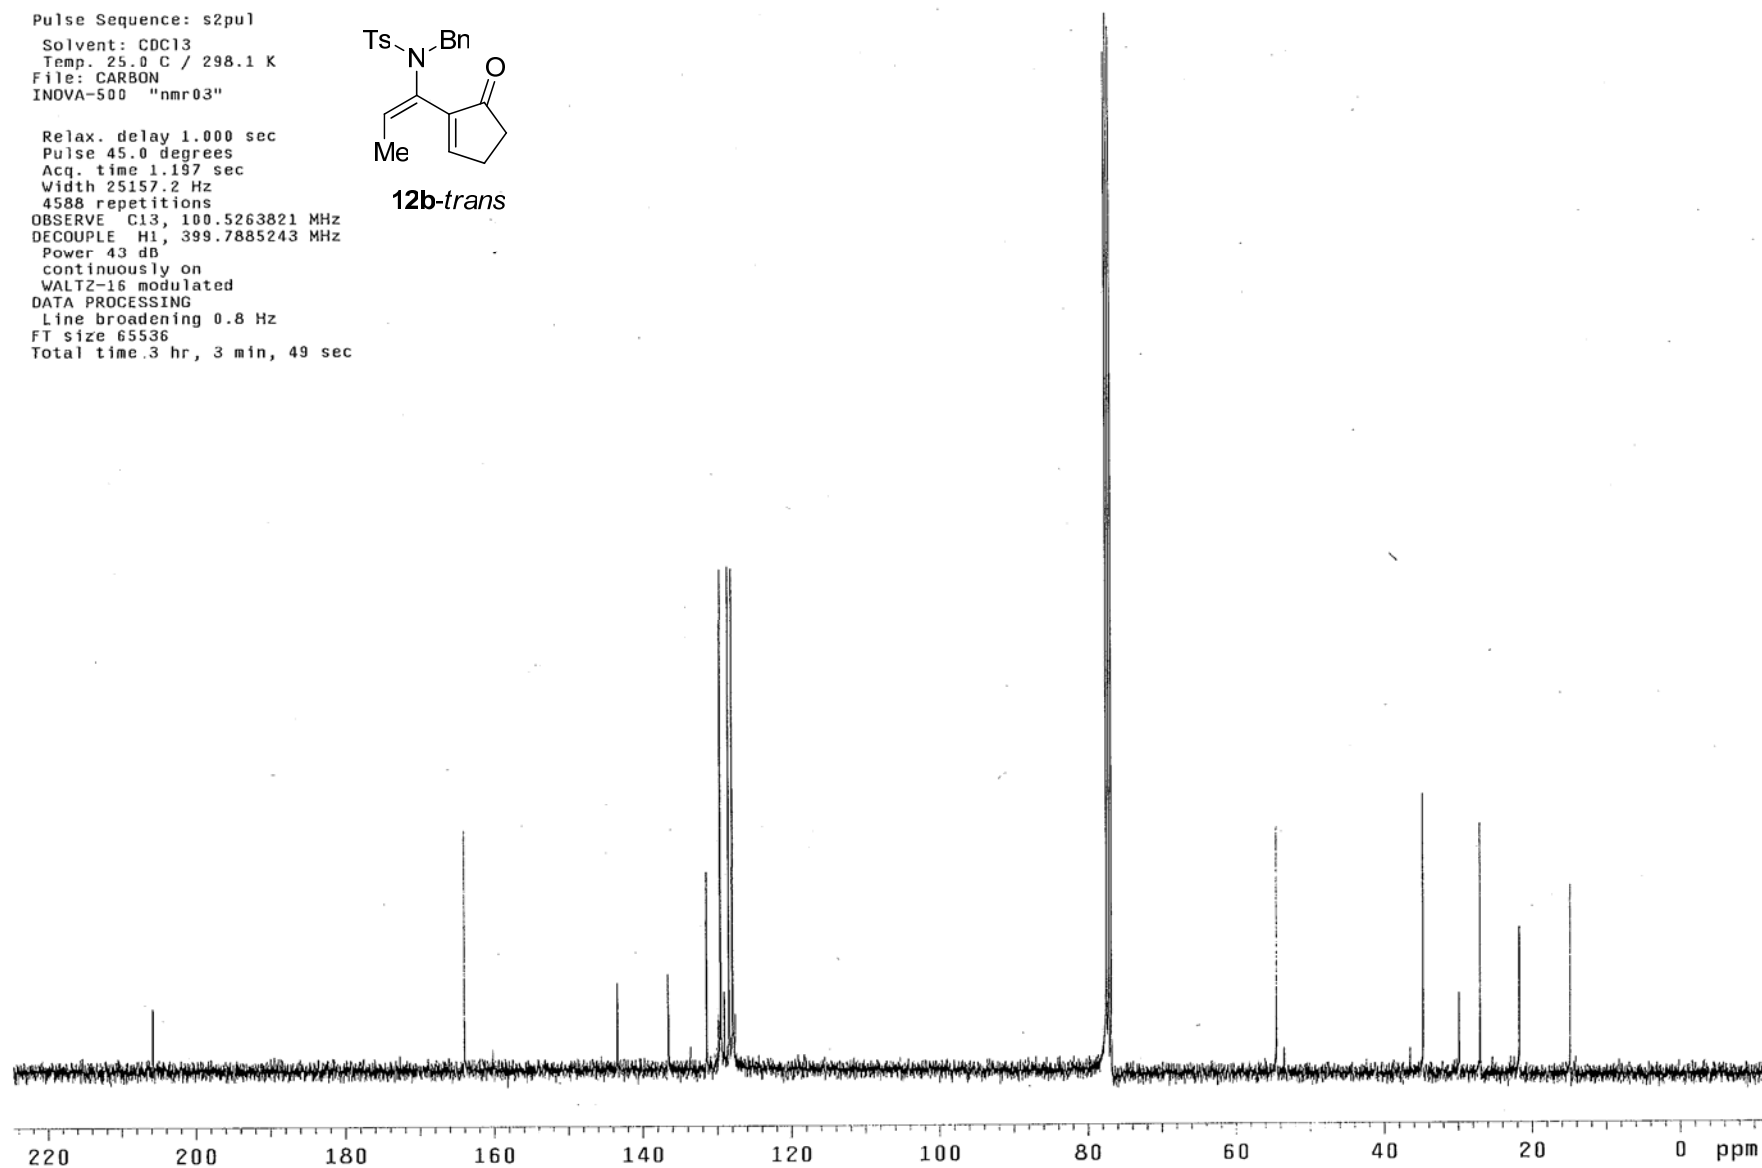

wxn553-2\_18Oct2013

Archive directory: /export/home/xiaona/vnmrsys/data  
Sample directory: wxn553-2\_18Oct2013

Pulse Sequence: s2pul  
Solvent: CDCl3  
Temp. 25.0 C / 298.1 K  
File: PROTON  
INOVA-500 "nmr03"

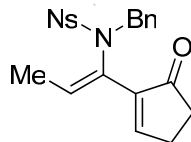

**12c-cis**

Relax. delay 1.000 sec  
Pulse 45.0 degrees  
Acq. time 3.754 sec  
Width 6387.7 Hz  
8 repetitions  
OBSERVE H1, 399.7865218 MHz  
DATA PROCESSING  
FT size 65536  
Total time 0 min, 57 sec

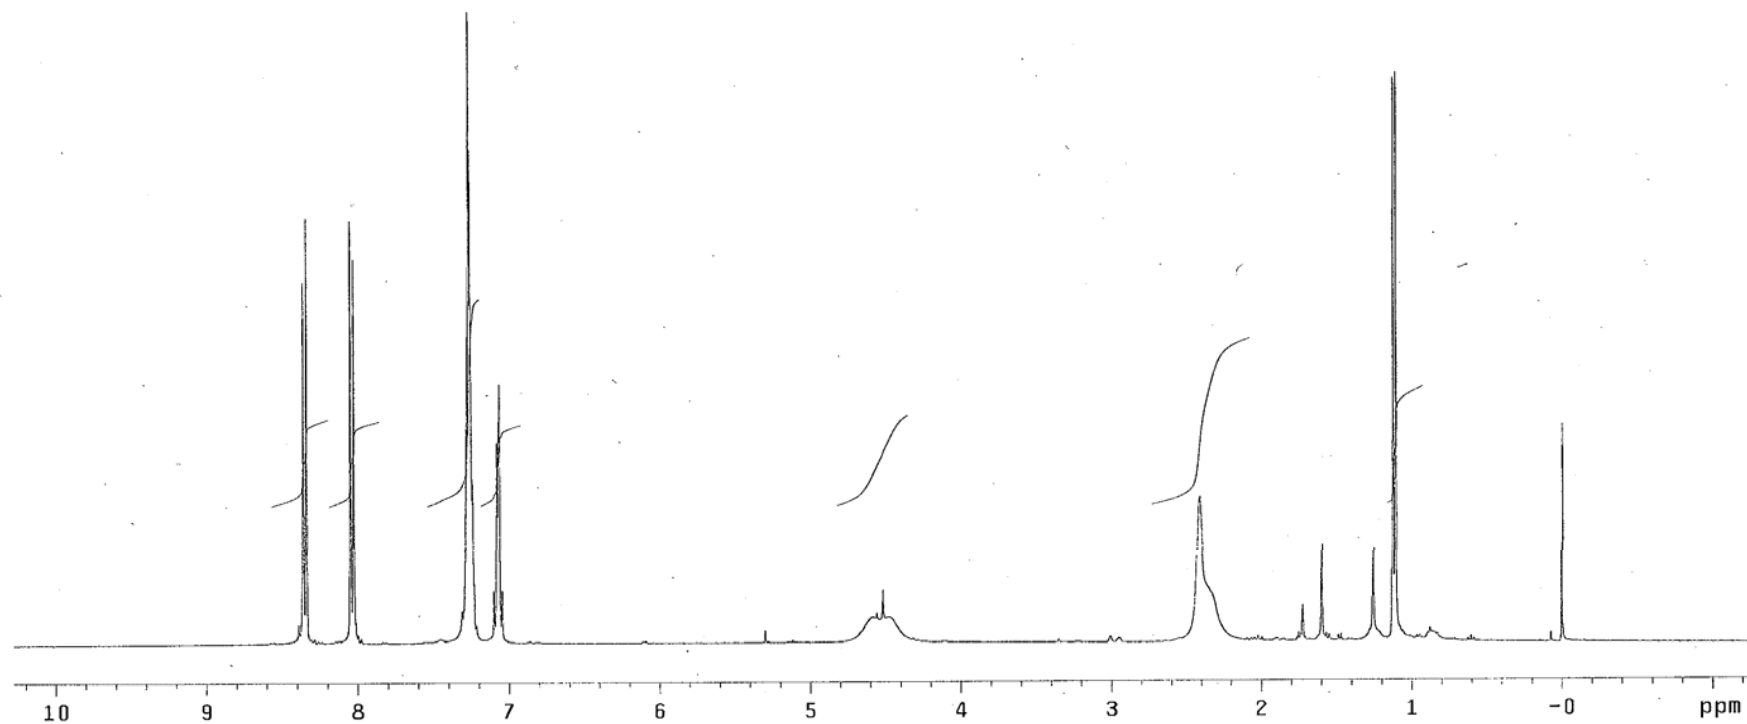



wxn553-2\_18Oct2013-21:59:33

Archive directory: /export/home/xiaona/vnmrsys/data  
Sample directory: wxn553-2\_18Oct2013-21:59:33

Pulse Sequence: s2pu1  
Solvent: CDCl3  
Temp. 25.0 C / 298.1 K  
File: CARBON  
INNOVA-500 "nmr03"

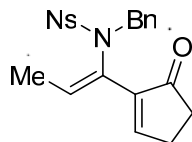

**12c-cis**

Relax. delay 1.000 sec  
Pulse 45.0 degrees  
Acq. time 1.197 sec  
Width 25157.2 Hz  
5000 repetitions  
OBSERVE C13, 100.5263829 MHz  
DECOUPLE H1, 399.7885243 MHz  
Power 43 dB  
continuously on  
WALTZ-16 modulated  
DATA PROCESSING  
Line broadening 0.8 Hz  
FT size 65536  
Total time 3 hr, 3 min, 49 sec

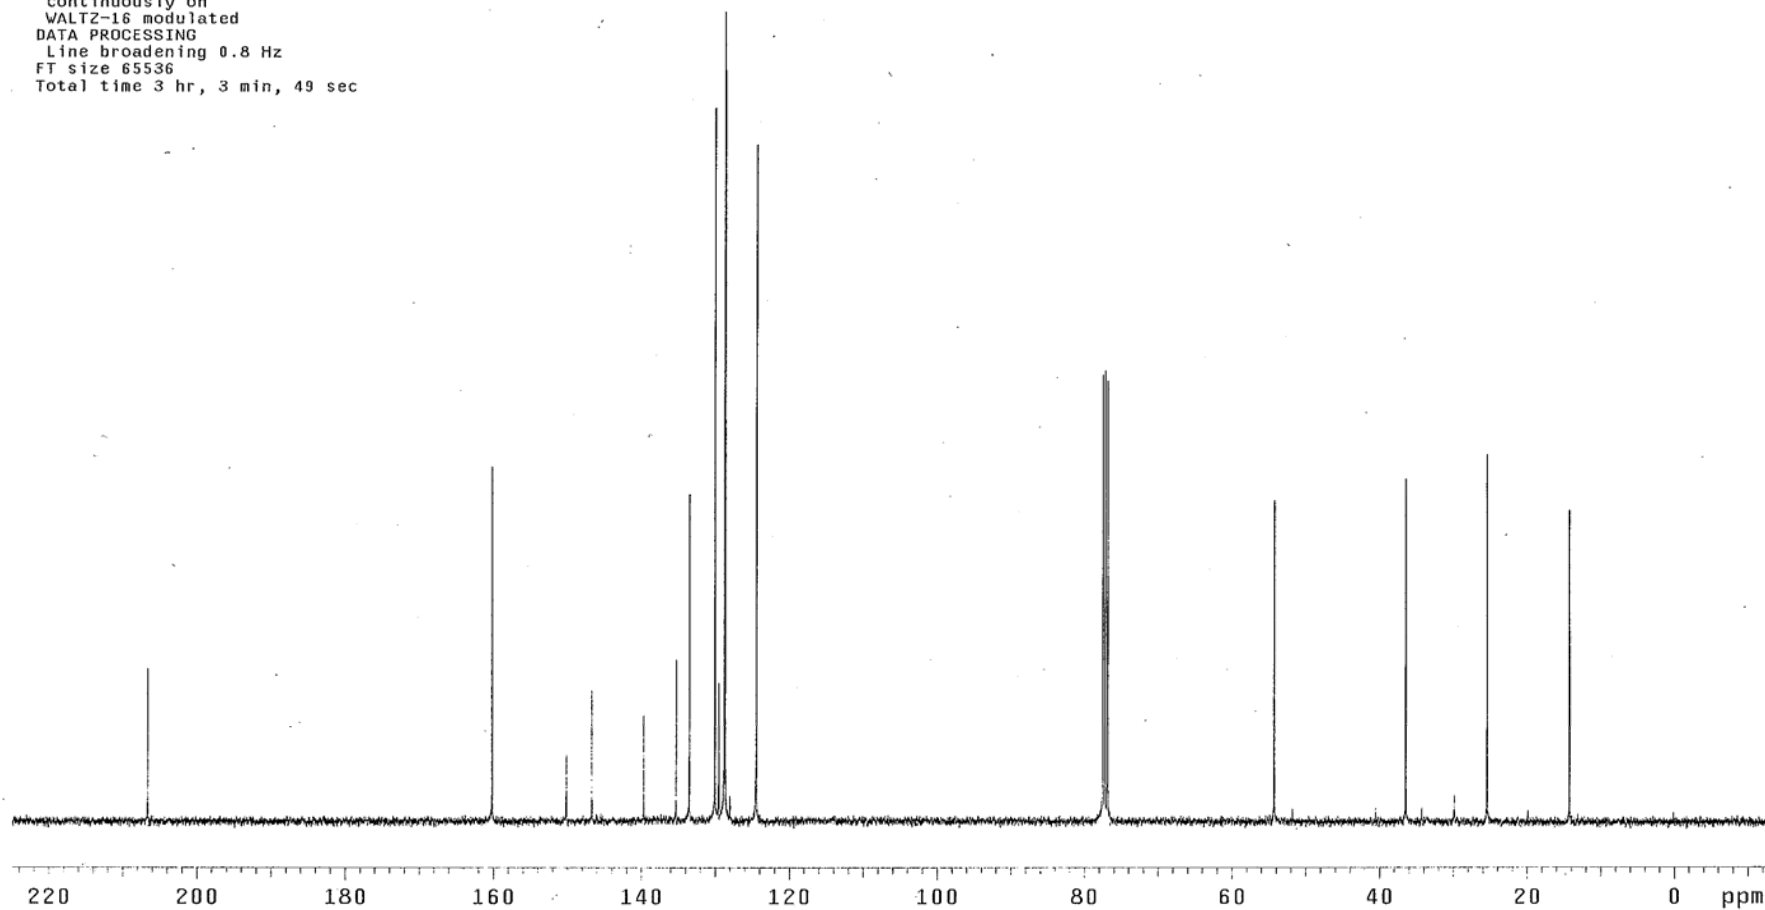

wxn553-3\_18Oct2013

Archive directory: /export/home/xiaona/vnmrsys/data  
Sample directory: wxn553-3\_18Oct2013

Pulse Sequence: s2pu1  
Solvent: CDCl3  
Temp. 25.0 C / 298.1 K  
File: PROTON  
INOVA-500 "nmr03"

Relax. delay 1.000 sec  
Pulse 45.0 degrees  
Acq. time 3.747 sec  
Width 8000.0 Hz  
8 repetitions  
OBSERVE H1, 499.7288158 MHz  
DATA PROCESSING  
Line broadening 0.5 Hz  
FT size 65536  
Total time 0 min, 38 sec

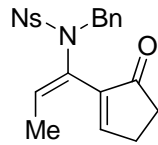

**12c-trans**

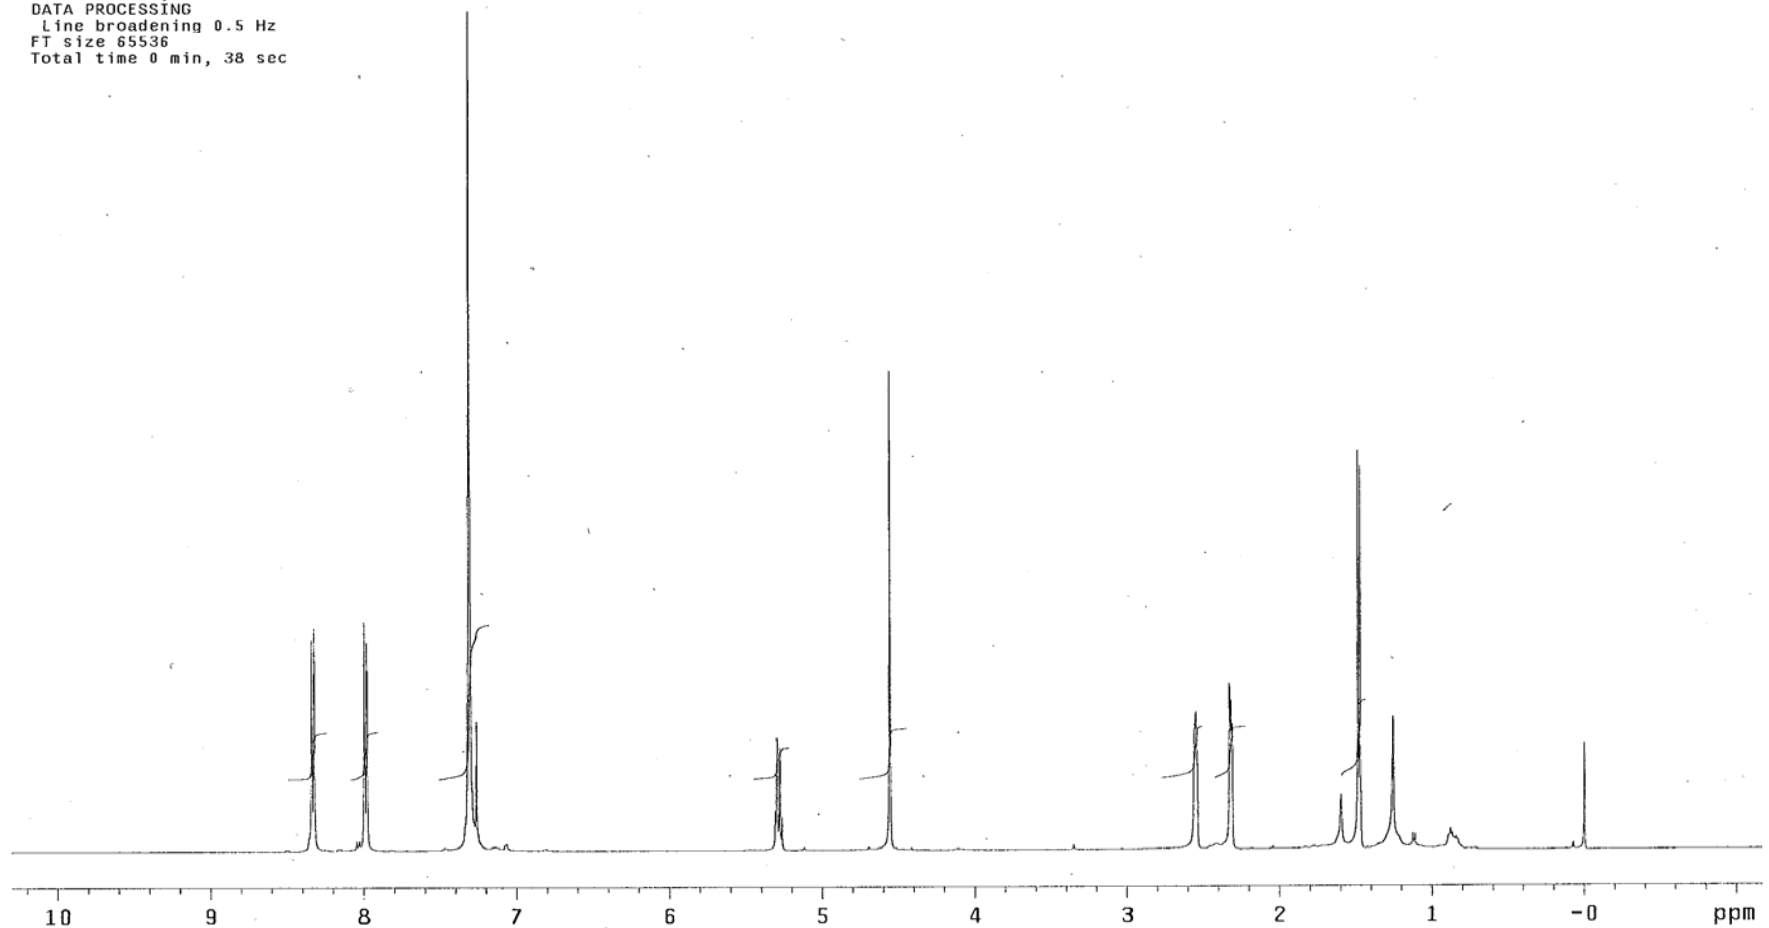

wxn553-3\_18Oct2013-22:05:45

Archive directory: /export/home/xiaona/vnmrsys/data  
Sample directory: wxn553-3\_18Oct2013-22:05:45

Pulse Sequence: s2pul  
Solvent: CDCl3  
Temp. 25.0 C / 298.1 K  
User: 1-14-87  
File: CARBON  
INOVA-500 "nmr03"

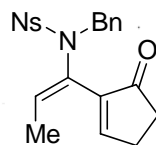

12c-trans

Relax. delay 1.000 sec  
Pulse 45.0 degrees  
Acq. time 1.299 sec  
Width 31446.5 Hz  
5000 repetitions  
OBSERVE C13, 125.6568876 MHz  
DECOUPLE H1, 499.7312897 MHz  
Power 39 dB  
continuously on  
WALTZ-16 modulated  
DATA PROCESSING  
Line broadening 0.5 Hz  
FT size 131072  
Total time 3 hr, 12 min, 23 sec

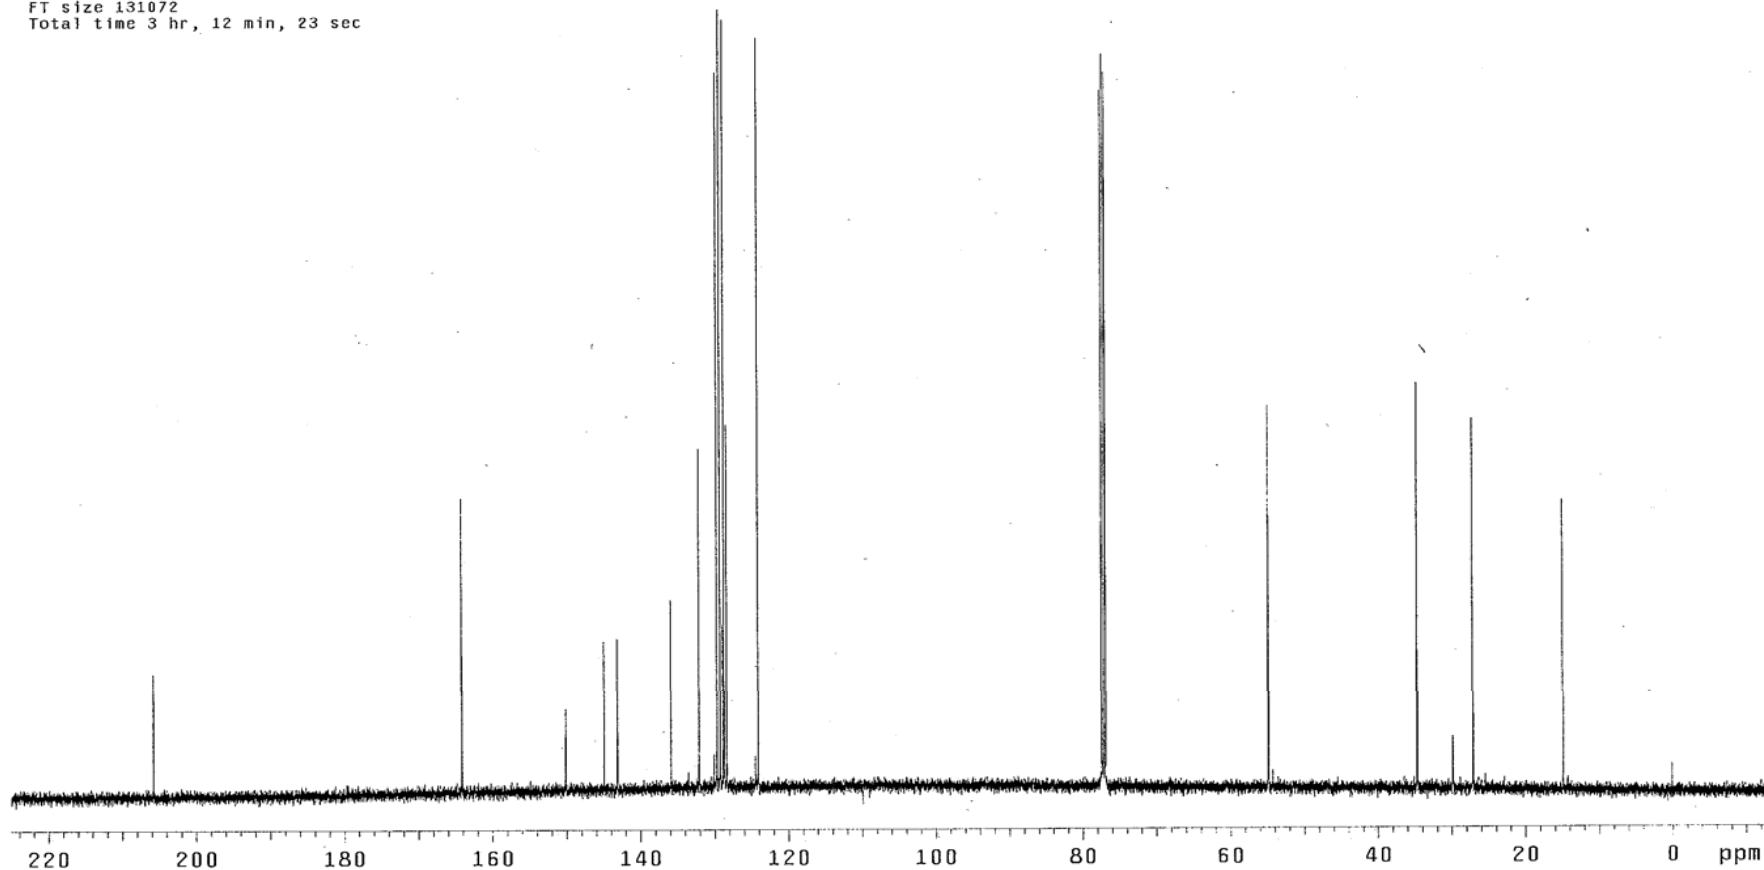

wxn636-641-1\_01Mar2014

Archive directory: /export/home/xiaona/vnmrsys/data  
Sample directory: wxn636-641-1\_01Mar2014

Pulse Sequence: s2pu1

Solvent: CDCl3  
Temp. 25.0 C / 298.1 K  
File: PROTON  
INOVA-500 "nmr03"

Relax. delay 1.000 sec  
Pulse 45.0 degrees  
Acq. time 3.747 sec  
Width 8000.0 Hz  
8 repetitions  
OBSERVE H1, 499.7288183 MHz  
DATA PROCESSING  
Line broadening 0.5 Hz  
ET size 65536  
Total time 0 min, 38 sec

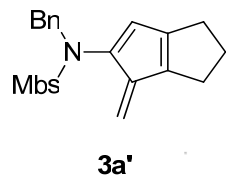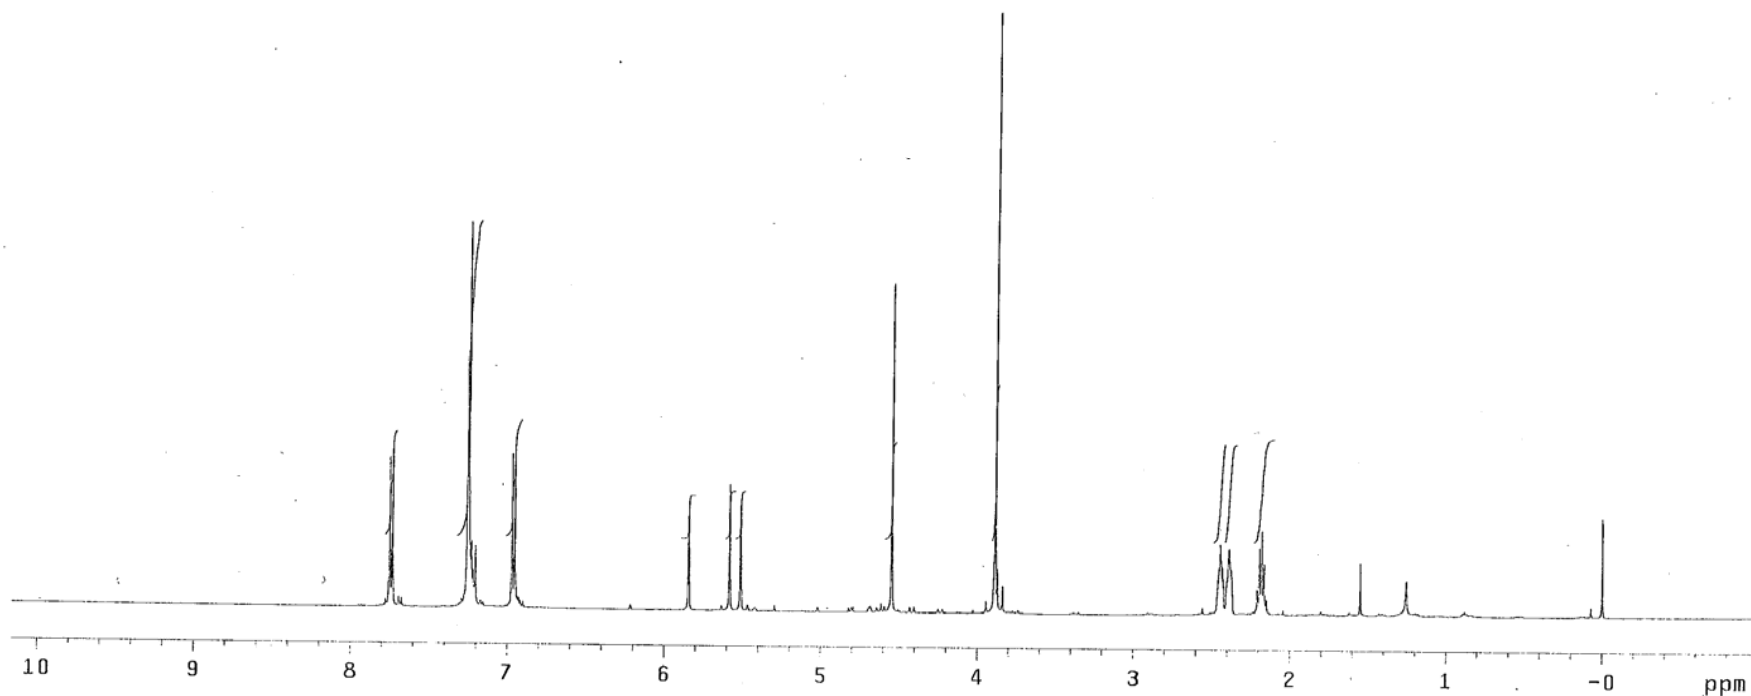

wxn636-641-1\_01Mar2014

Archive directory: /export/home/xiaona/vnmrsys/data  
Sample directory: wxn636-641-1\_01Mar2014

Pulse Sequence: s2pul

Solvent: CDCl<sub>3</sub>  
Temp. 25.0 C / 298.1 K  
User: 1-14-87  
File: CARBON  
INOVA-500 "nmr03"

Relax. delay 1.000 sec  
Pulse 45.0 degrees  
Acq. time 1.299 sec  
Width 31446.5 Hz  
3998 repetitions  
OBSERVE C13, 125.6568867 MHz  
DECOUPLE H1, 499.7312897 MHz  
Power 46 dB  
continuously on  
WALTZ-16 modulated  
DATA PROCESSING  
Line broadening 0.5 Hz  
FT size 131072  
Total time 3 hr, 12 min, 23 sec

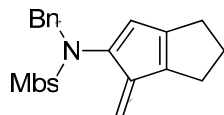

3a'

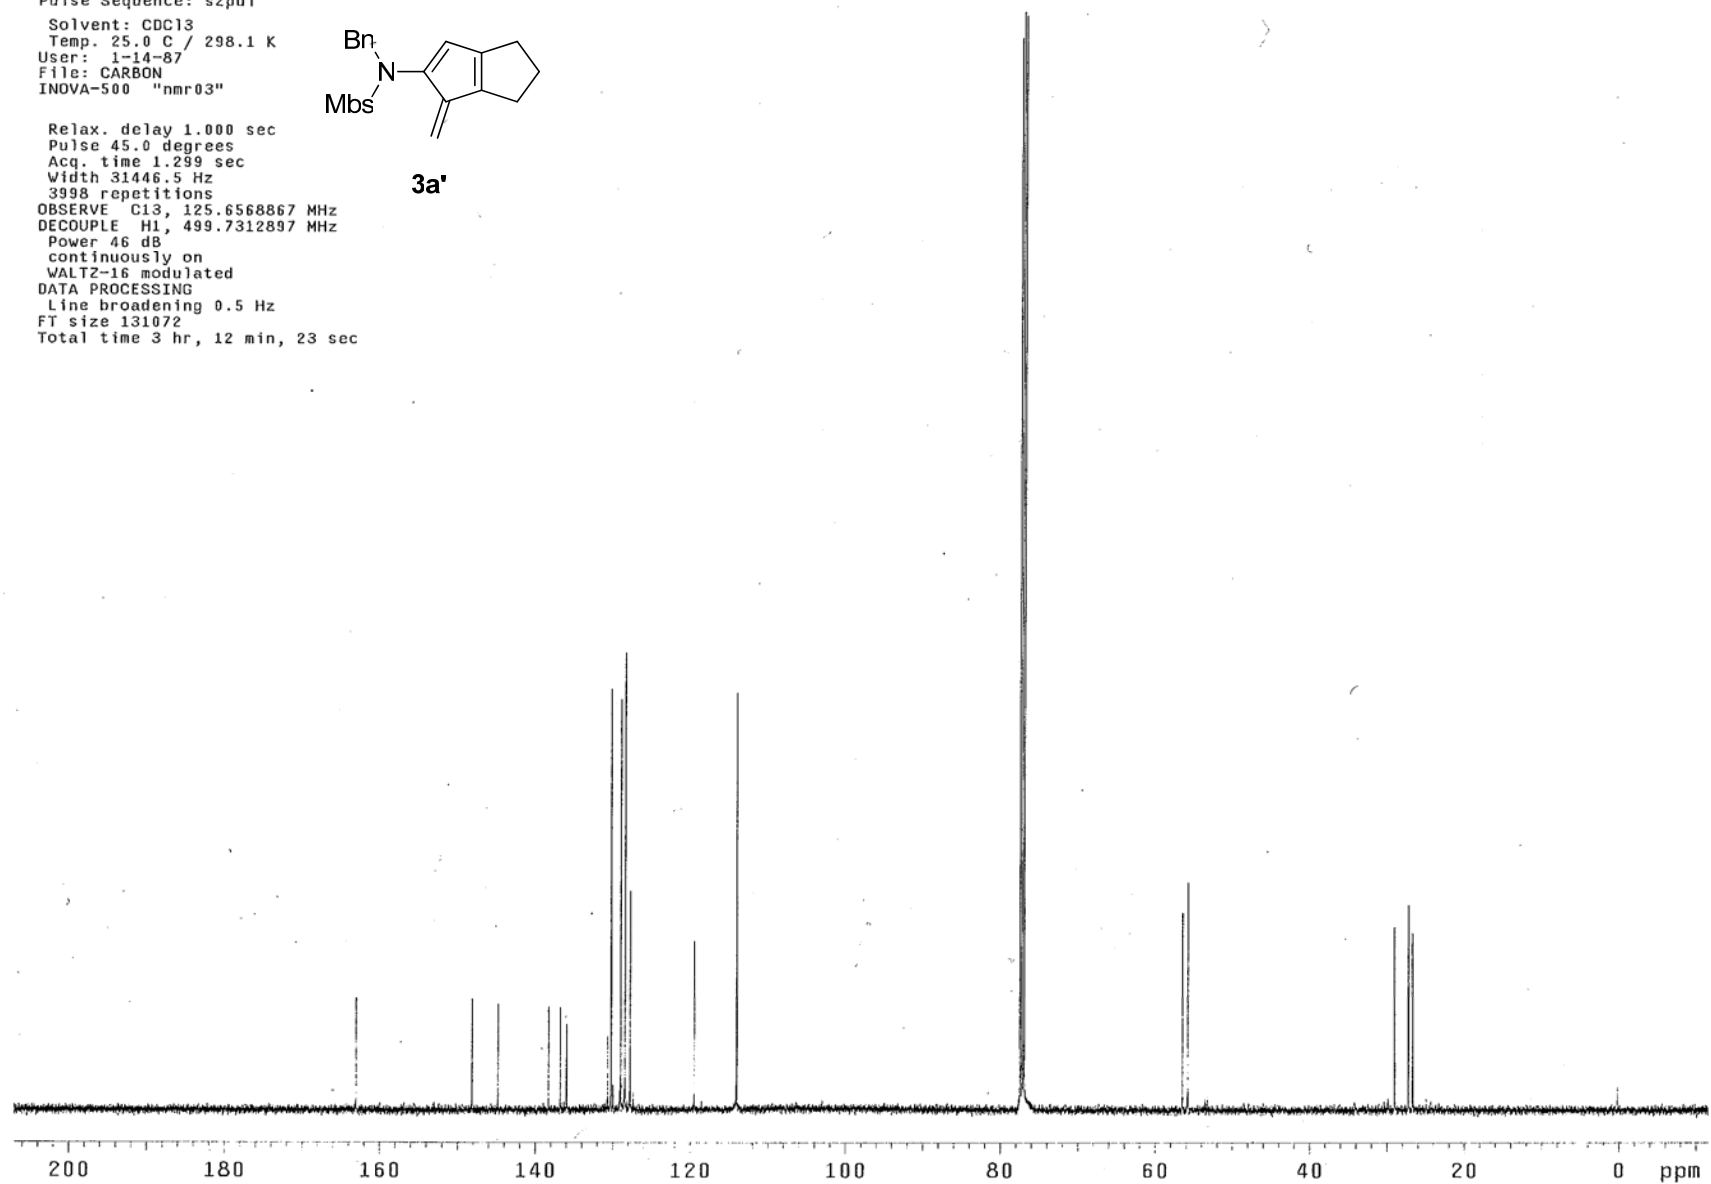

wxn641-636-624-1\_01Mar2014

Archive directory: /export/home/xiaona/vnmrsys/data  
Sample directory: wxn641-636-624-1\_01Mar2014

Pulse Sequence: s2pul

Solvent: CDCl3  
Temp. 25.0 C / 298.1 K  
File: PROTON  
INOVA-500 "nmr03"

Relax. delay 1.000 sec  
Pulse 45.0 degrees  
Acq. time 3.747 sec  
Width 8000.0 Hz  
8 repetitions  
OBSERVE H1, 499.7288156 MHz  
DATA PROCESSING  
Line broadening 0.5 Hz  
FT size 65536  
Total time 0 min, 38 sec

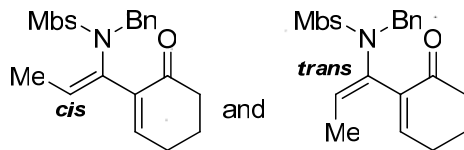

*i-cis*

*i-trans*

dr 2.3:1

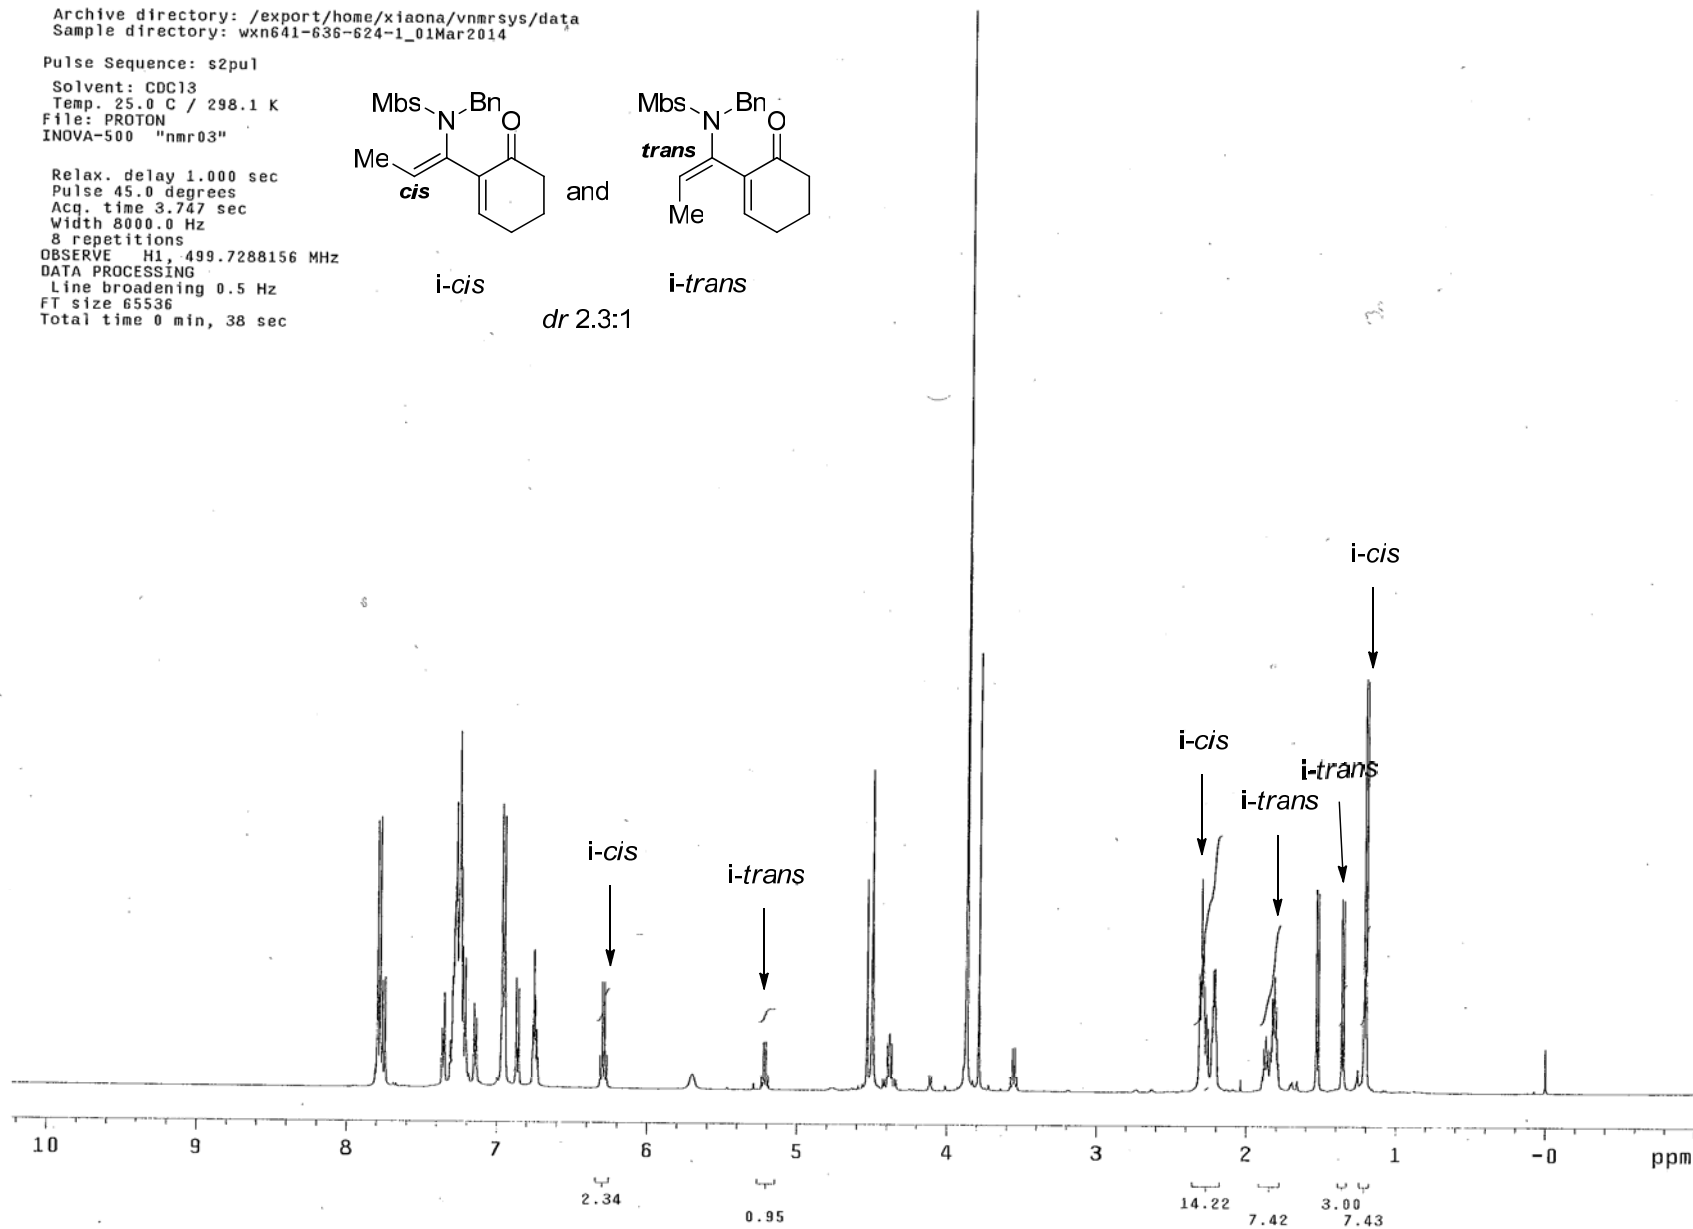

DEPT, COSY, NOESY, HMQC and HMBC for **3a**

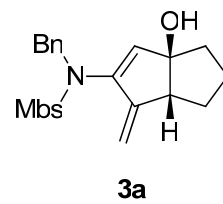

wxn429-2\_12Apr2013-10:34:43

Archive directory: /export/home/xiaona/vnmrsys/data  
Sample directory: wxn429-2\_12Apr2013-10:34:43

Pulse Sequence: DEPT

Solvent: CDCl<sub>3</sub>  
Temp. 25.0 C / 298.1 K  
File: DEPT  
INNOVA-500 "nmr03"

Relax. delay 1.000 sec  
Pulse 90.0 degrees  
Acq. time 1.198 sec  
Width 25157.2 Hz  
64 repetitions  
OBSERVE C13, 100.5263868 MHz  
DECOUPLE H1, 399.7885243 MHz  
Power 43 dB  
on during acquisition  
off during delay  
WALTZ-16 modulated  
DATA PROCESSING  
Line broadening 0.8 Hz  
FT size 65536  
Total time 2 min, 31 sec

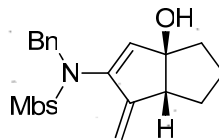

3a

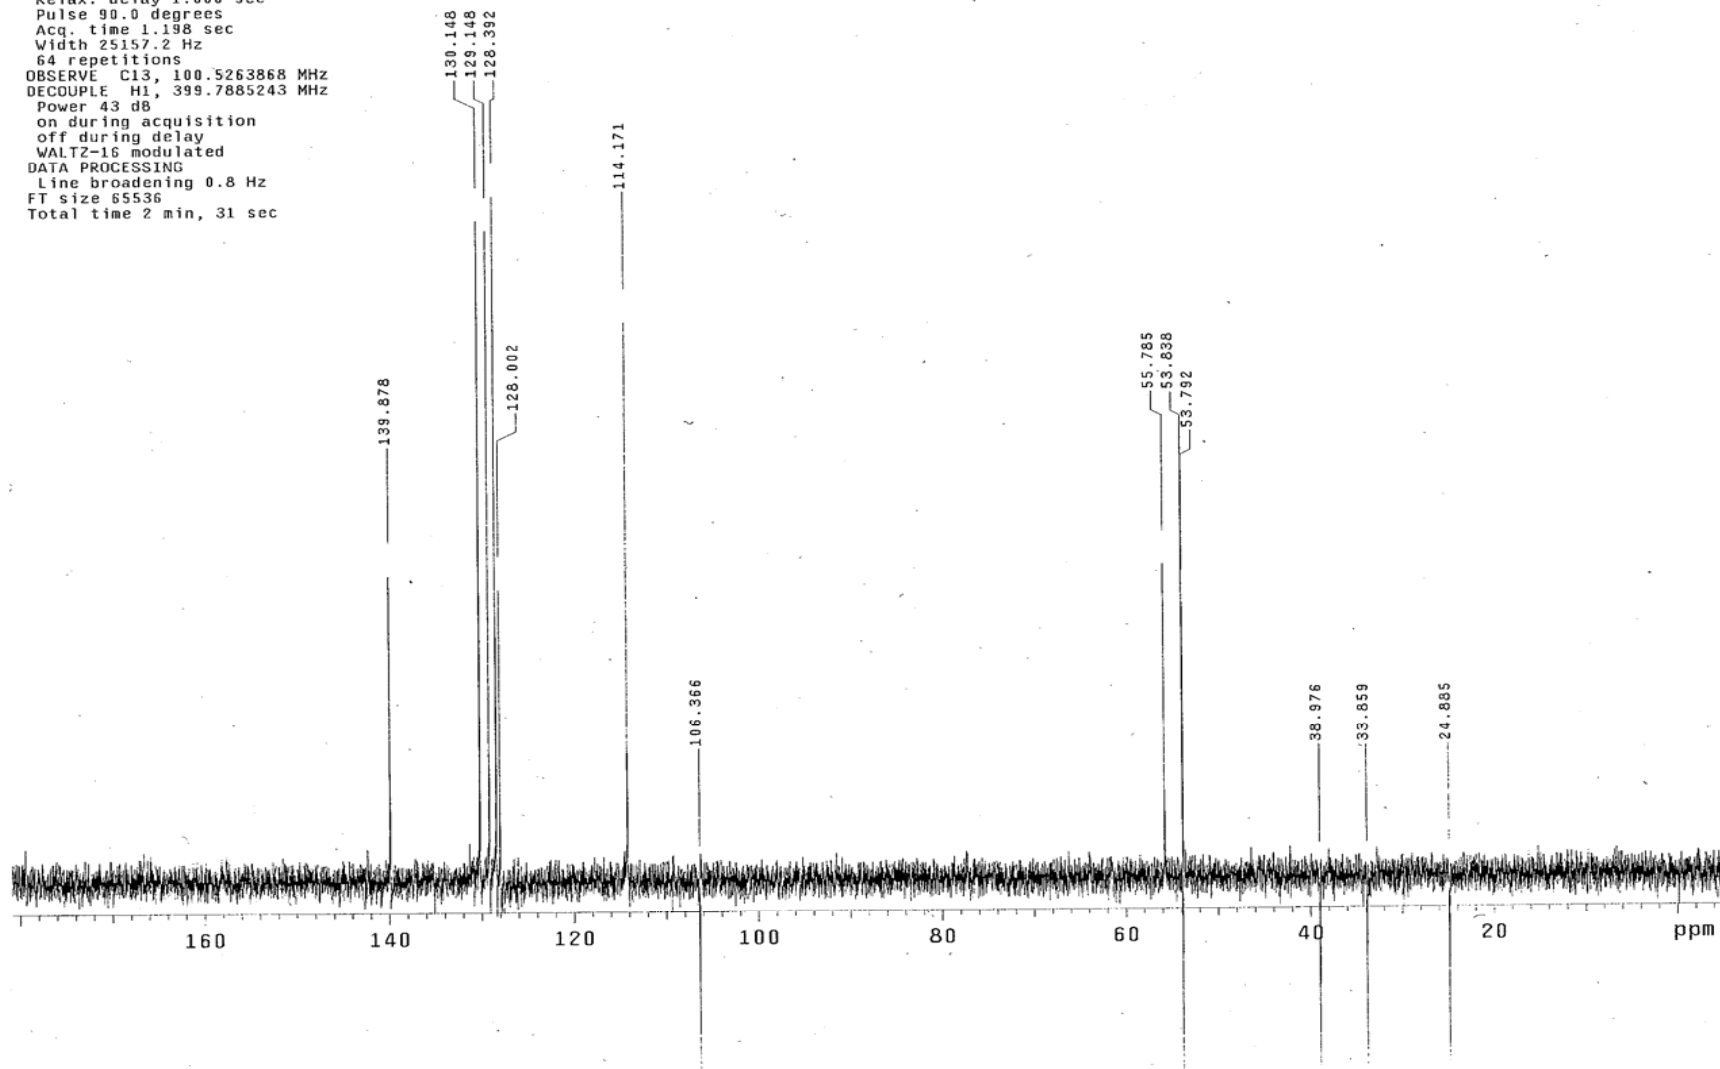



wxn429-2\_11Mar2013

Archive directory: /export/home/xiaona/vnmrsys/data  
Sample directory: wxn429-2\_11Mar2013

Pulse Sequence: gCOSY  
Solvent: CDCl3  
Temp. 25.0 C / 298.1 K  
File: gCOSY  
INNOVA-500 "nmr03"

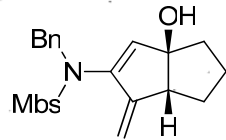

3a

Relax. delay 1.000 sec.  
Acq. time 0.128 sec  
Width 8000.0 Hz  
2D Width 8000.0 Hz  
Single scan  
200 increments  
OBSERVE H1, 499.7288170 MHz  
DATA PROCESSING  
Sq. sine bell 0.064 sec  
F1 DATA PROCESSING  
Sq. sine bell 0.025 sec  
FT size 4096 x 4096  
Total time 4 min, 8 sec

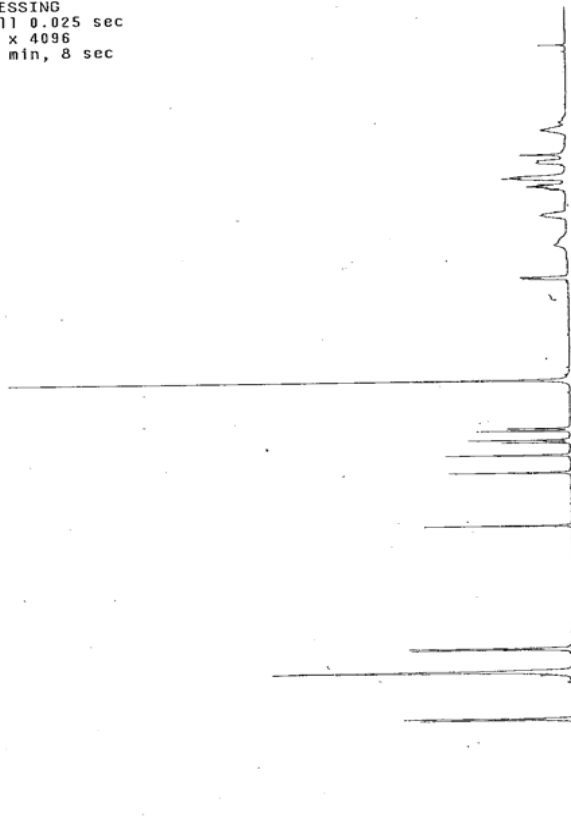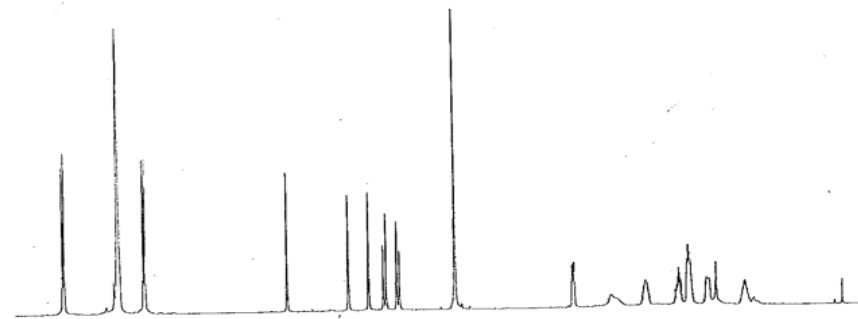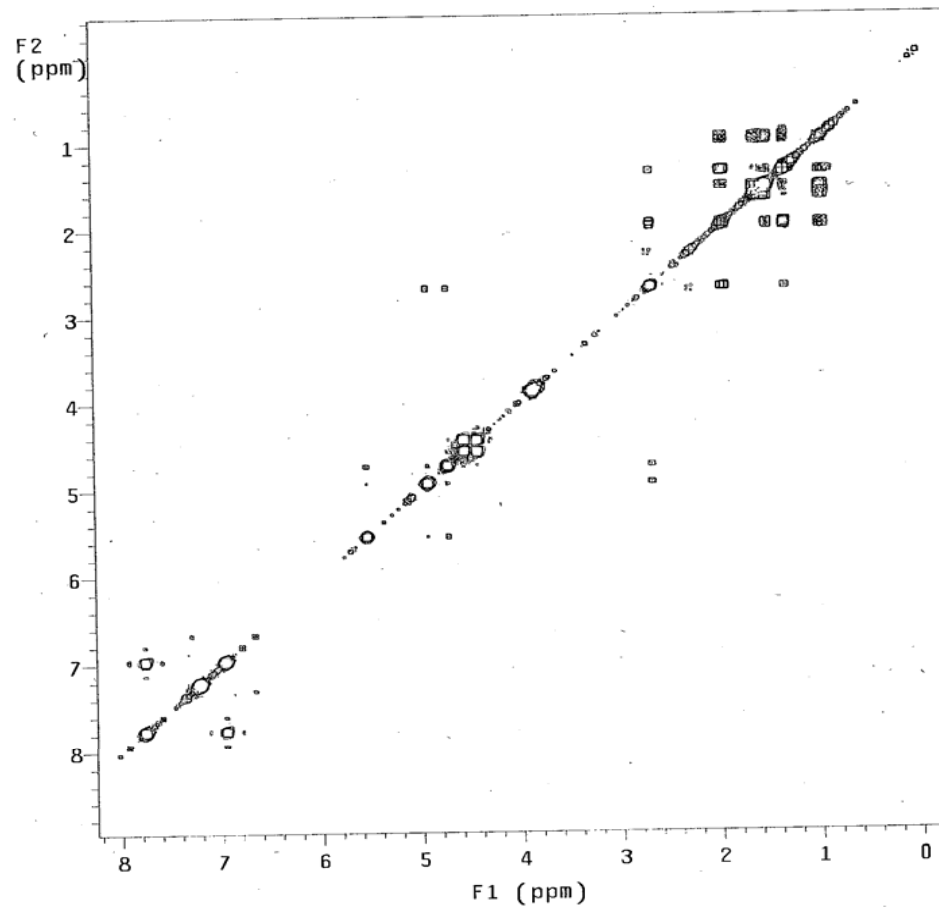

wxn429-2\_11Mar2013

Archive directory: /export/home/xiaona/vnmrsys/data  
Sample directory: wxn429-2\_11Mar2013

Pulse Sequence: NOESY

Solvent: CDCl<sub>3</sub>  
Temp. 25.0 C / 298.1 K  
File: NOESY  
INNOVA-500 "nmr03"

Relax. delay 2.000 sec  
Mixing 0.200 sec  
Acq. time 0.128 sec  
Width 8000.0 Hz  
2D Width 8000.0 Hz  
16 repetitions  
2 x 128 increments  
OBSERVE H1, 499.7288170 MHz  
DATA PROCESSING  
Gauss apodization 0.059 sec  
F1 DATA PROCESSING  
Gauss apodization 0.015 sec  
FT size 4096 x 4096  
Total time 2 hr, 41 min, 39 sec

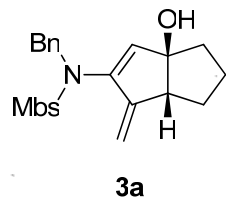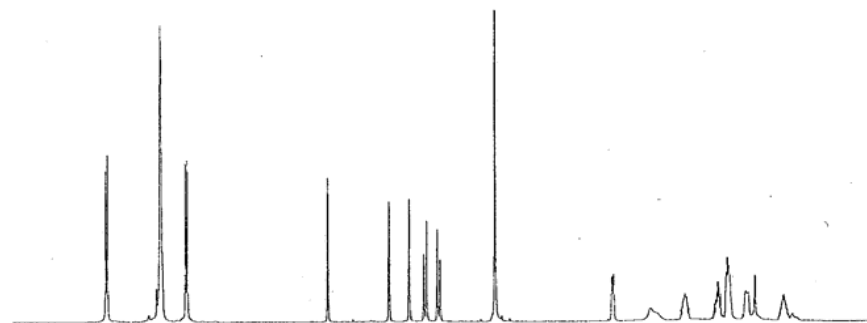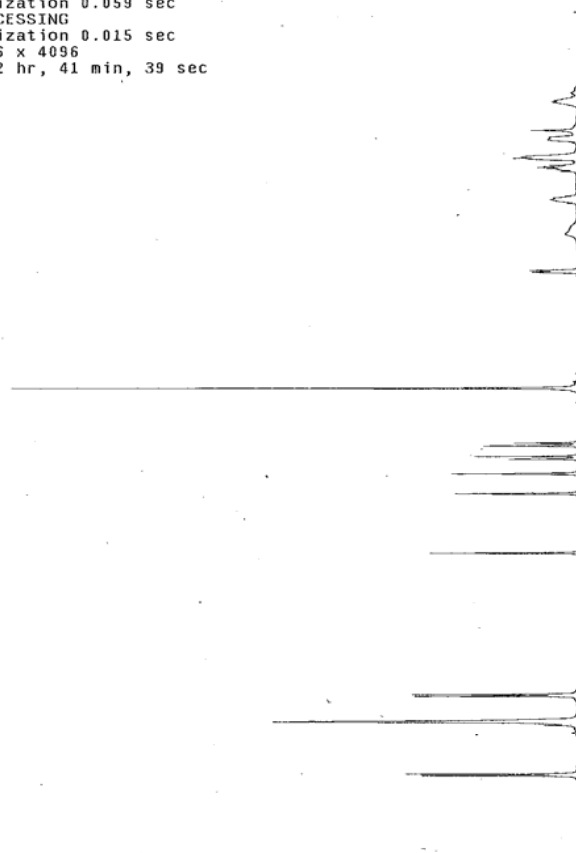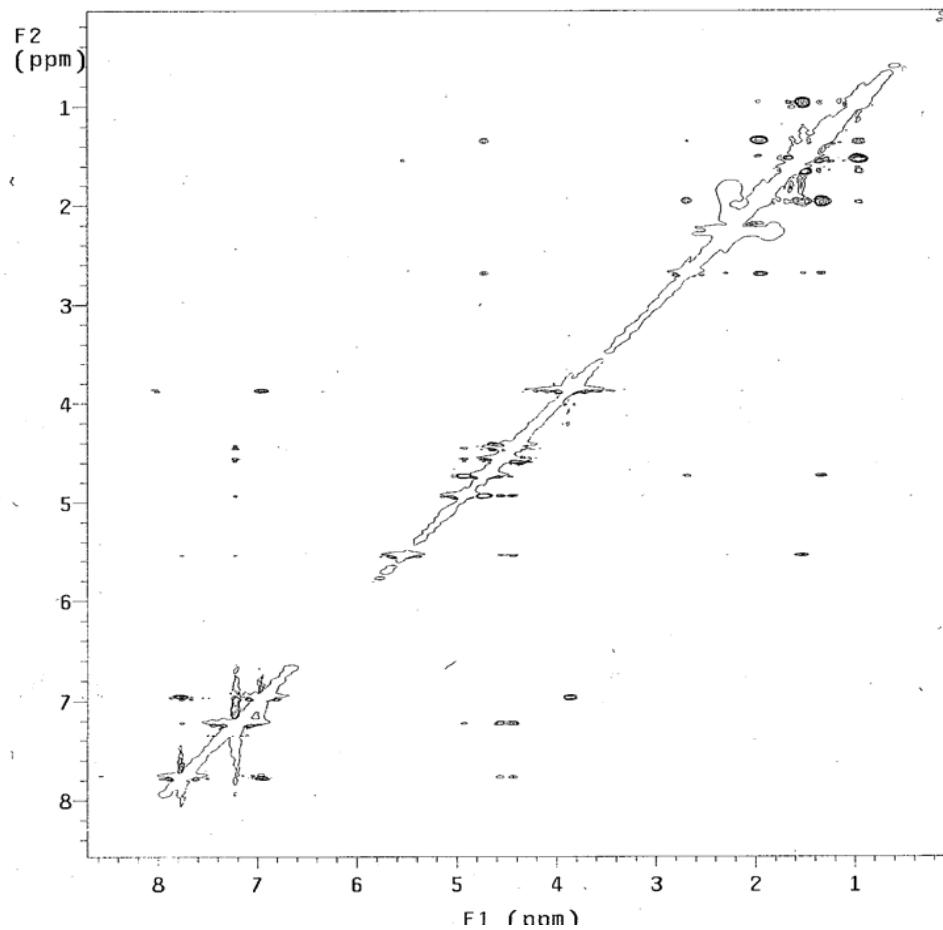

wxn429-2\_11Mar2013

Archive directory: /export/home/xiaona/vnmrsys/data  
Sample directory: wxn429-2\_11Mar2013

Pulse Sequence: NOESY

Solvent: CDC13  
Temp. 25.0 C / 298.1 K  
File: NOESY  
INOVA-500 "nmr03"

Relax. delay 2.000 sec  
Mixing 0.200 sec  
Acq. time 0.128 sec  
Width 8000.0 Hz  
2D Width 8000.0 Hz  
16 repetitions  
2 x 128 increments  
OBSERVE H1, 499.7288170 MHz  
DATA PROCESSING  
Gauss apodization 0.059 sec  
F1 DATA PROCESSING  
Gauss apodization 0.015 sec  
FT size 4096 x 4096  
Total time 2 hr, 41 min, 39 sec

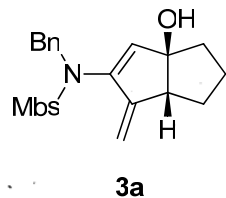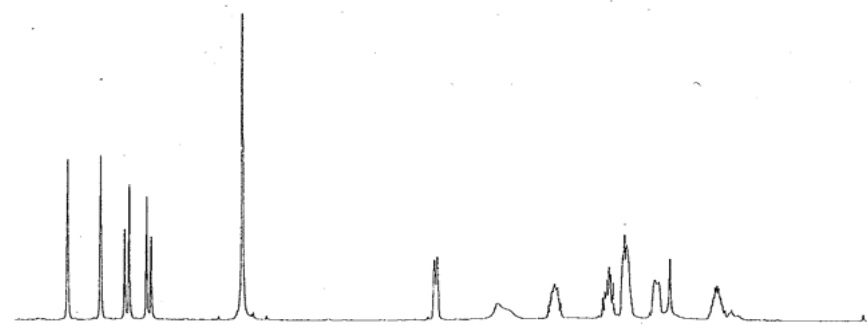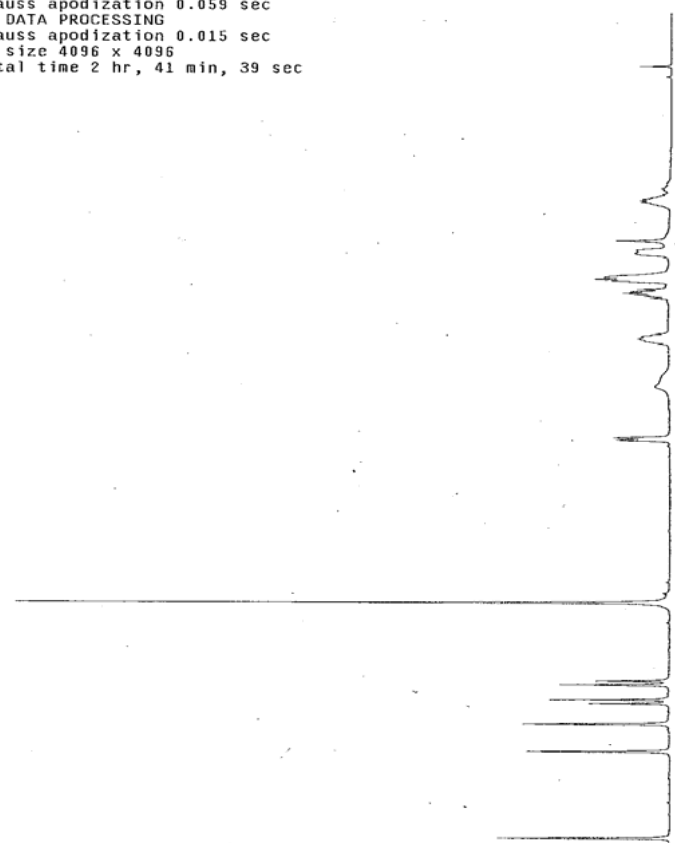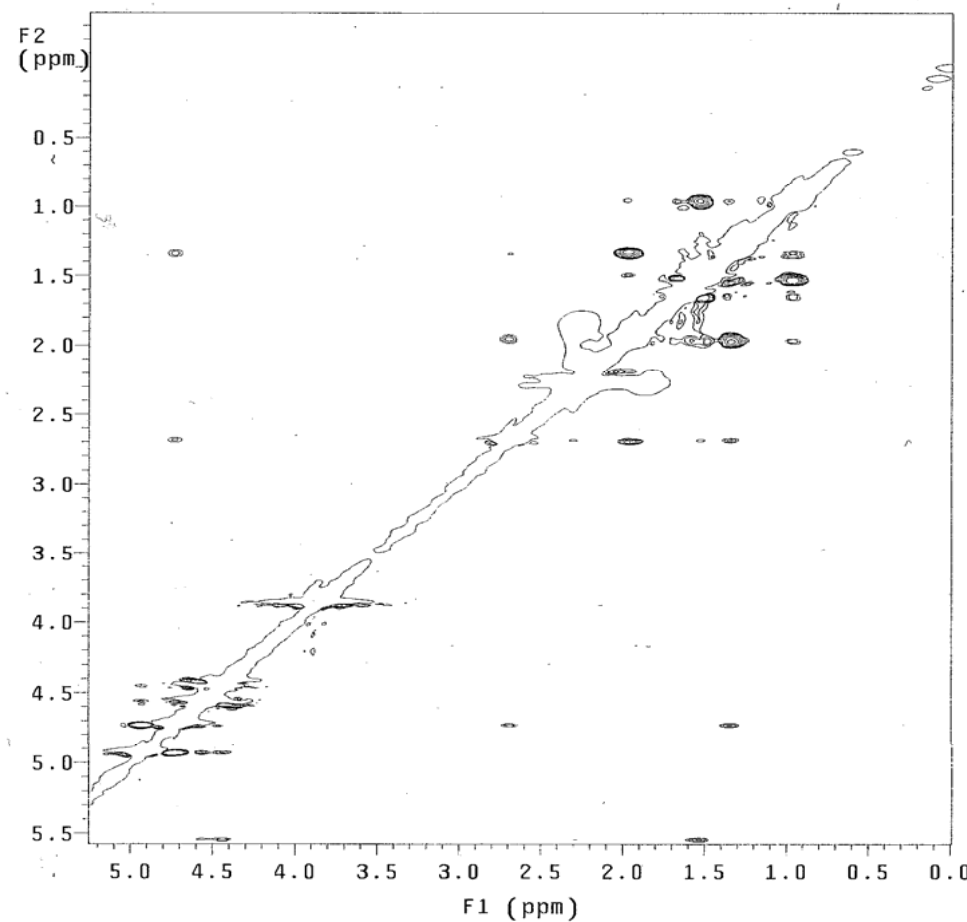

wxn429-2\_09Mar2013-22:49:47

Archive directory: /export/home/xiaona/vnmrsys/data  
Sample directory: wxn429-2\_09Mar2013-22:49:47

Pulse Sequence: gHMQC

Solvent: CDCl3  
Temp. 25.0 C / 298.1 K  
File: gHMQC  
INOVA-500 "nmr03"

Relax. delay 1.000 sec  
Acq. time 0.128 sec  
Width 8000.0 Hz  
2D Width 25133.5 Hz  
4 repetitions  
2 x 256 increments  
OBSERVE H1, 499.7288153 MHz  
DECOUPLE C13, 125.6681836 MHz  
Power 37 dB  
on during acquisition  
off during delay  
W40\_qn6121 modulated  
DATA PROCESSING  
Gauss apodization 0.059 sec  
F1 DATA PROCESSING  
Gauss apodization 0.019 sec  
FT size 2048 x 4096  
Total time 41 min, 3 sec

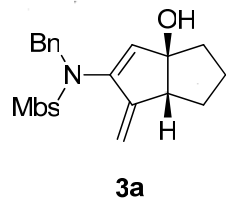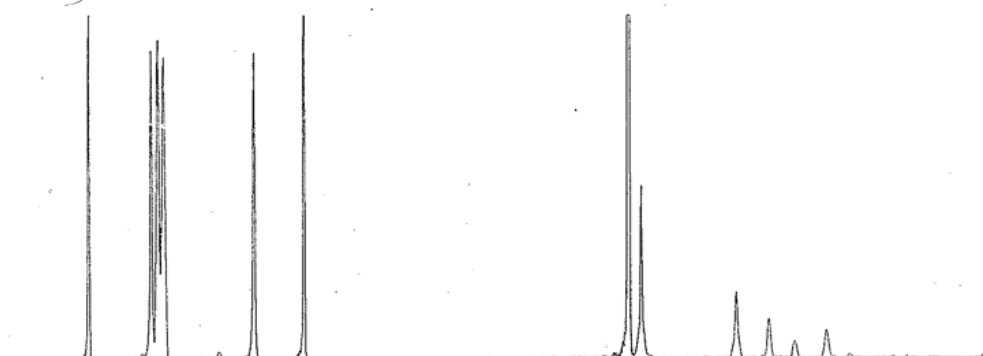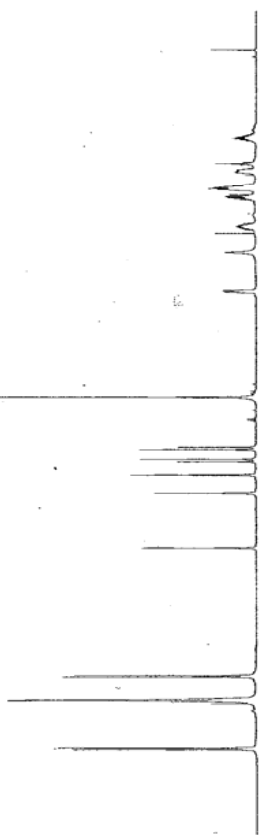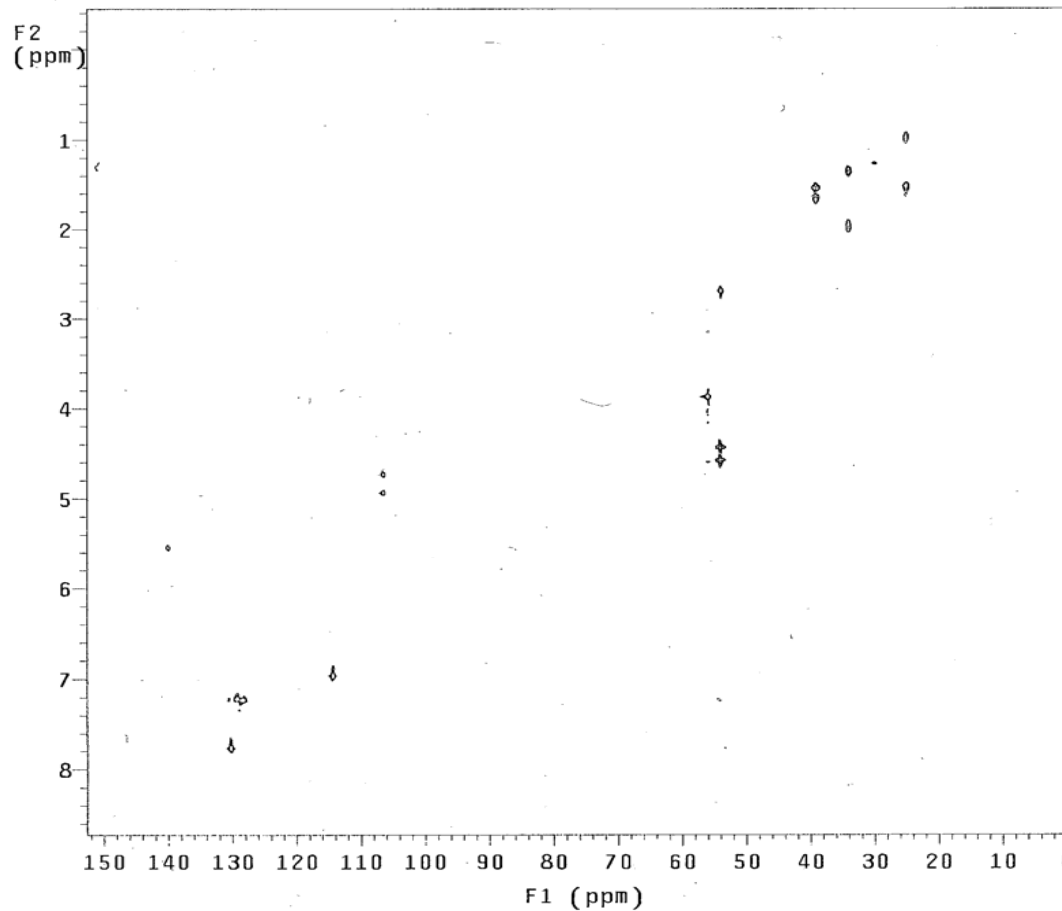

wxn429-2\_11Mar2013

Archive directory: /export/home/xiaona/vnmrsys/data  
Sample directory: wxn429-2\_11Mar2013

Pulse Sequence: gHMBC  
Solvent: CDCl<sub>3</sub>  
Temp. 25.0 C / 298.1 K  
File: gHMBC  
INOVA-500 "nmr03"

Relax. delay 1.000 sec  
Acq. time 0.128 sec  
Width 8000.0 Hz  
2D Width 25133.5 Hz  
8 repetitions  
512 increments  
OBSERVE H1, 499.7288170 MHz  
DATA PROCESSING  
Sine bell 0.064 sec  
F1 DATA PROCESSING  
Sine bell 0.010 sec  
FT size 2048 x 8192  
Total time 1 hr, 23 min, 55 sec

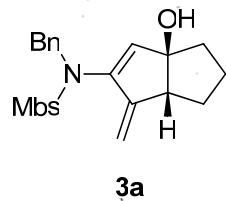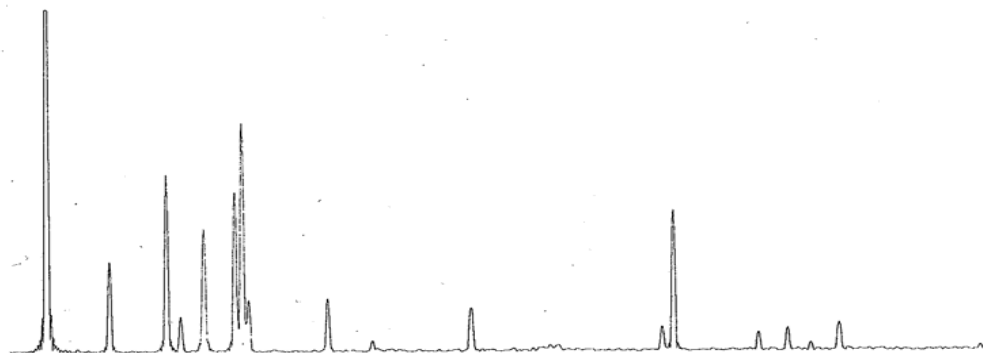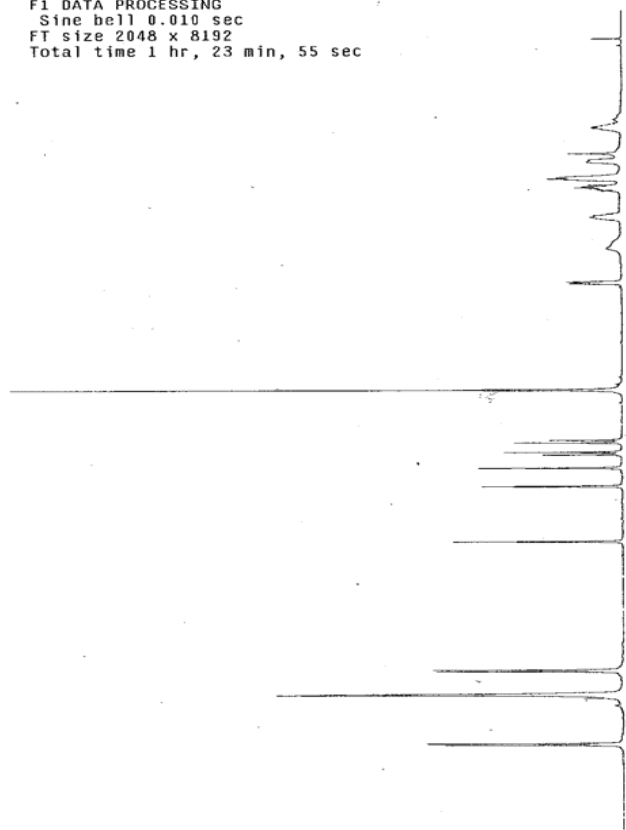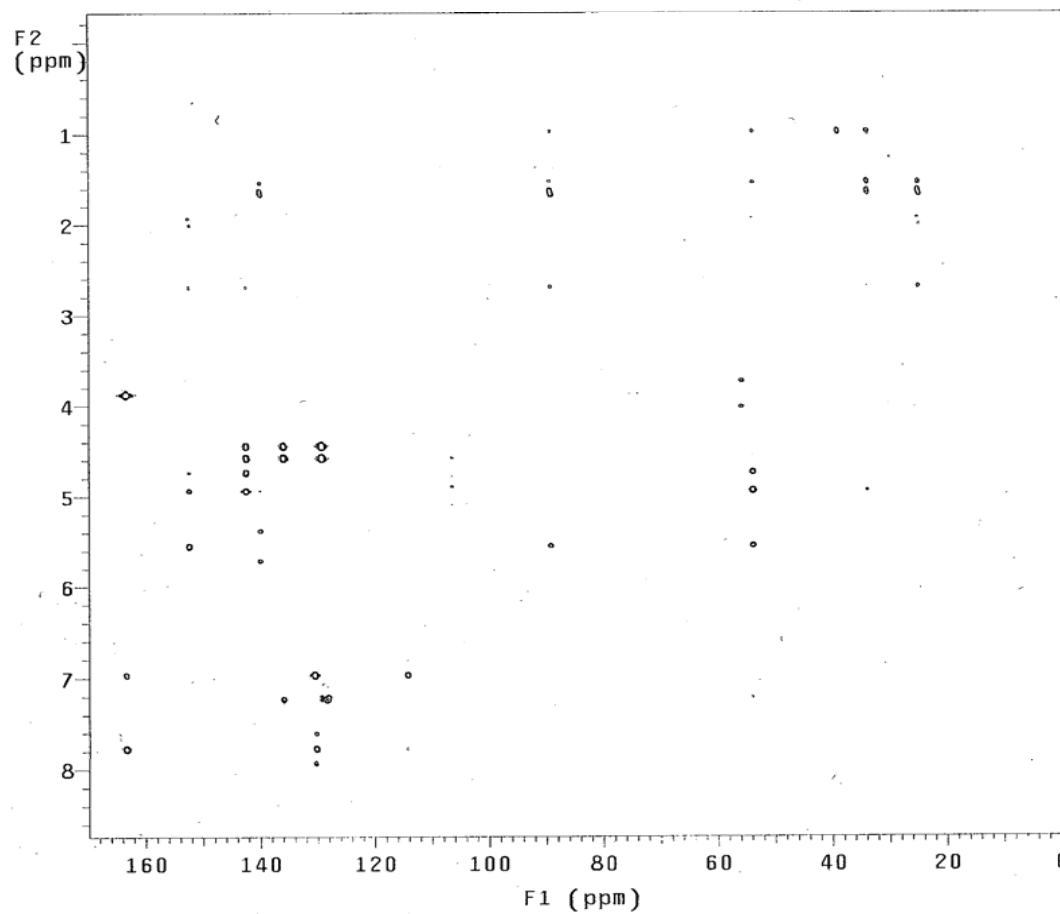

NOESY for **3e**

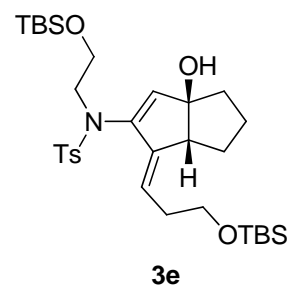

wxn518-3\_30Sep2013-14:24:46

Archive directory: /export/home/xiaona/vnarsys/data  
Sample directory: wxn518-3\_30Sep2013-14:24:46

Pulse Sequence: NOESY

Solvent: CDCl3  
Temp. 25.0 C / 298.1 K  
File: NOESY  
INOVA-500 "nmr03"

Relax. delay 2.000 sec  
Mixing 0.200 sec  
Acq. time 0.128 sec  
Width 8000.0 Hz  
2D Width 8000.0 Hz  
16 repetitions  
2 x 256 increments  
OBSERVE H1, 499.7288163 MHz  
DATA PROCESSING  
Gauss apodization 0.059 sec  
F1 DATA PROCESSING  
Gauss apodization 0.030 sec  
FT size 4096 x 4096  
Total time 5 hr, 23 min, 8 sec

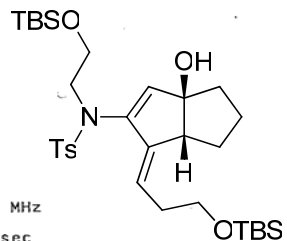

3e

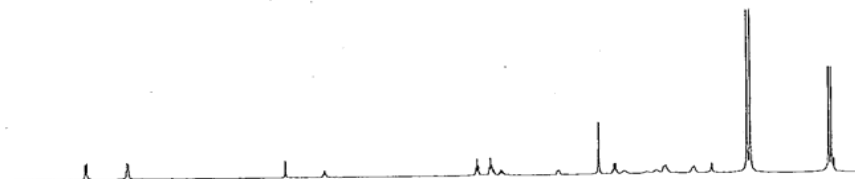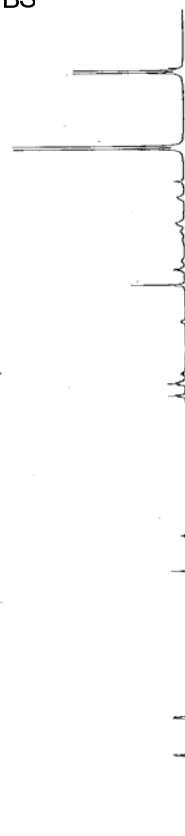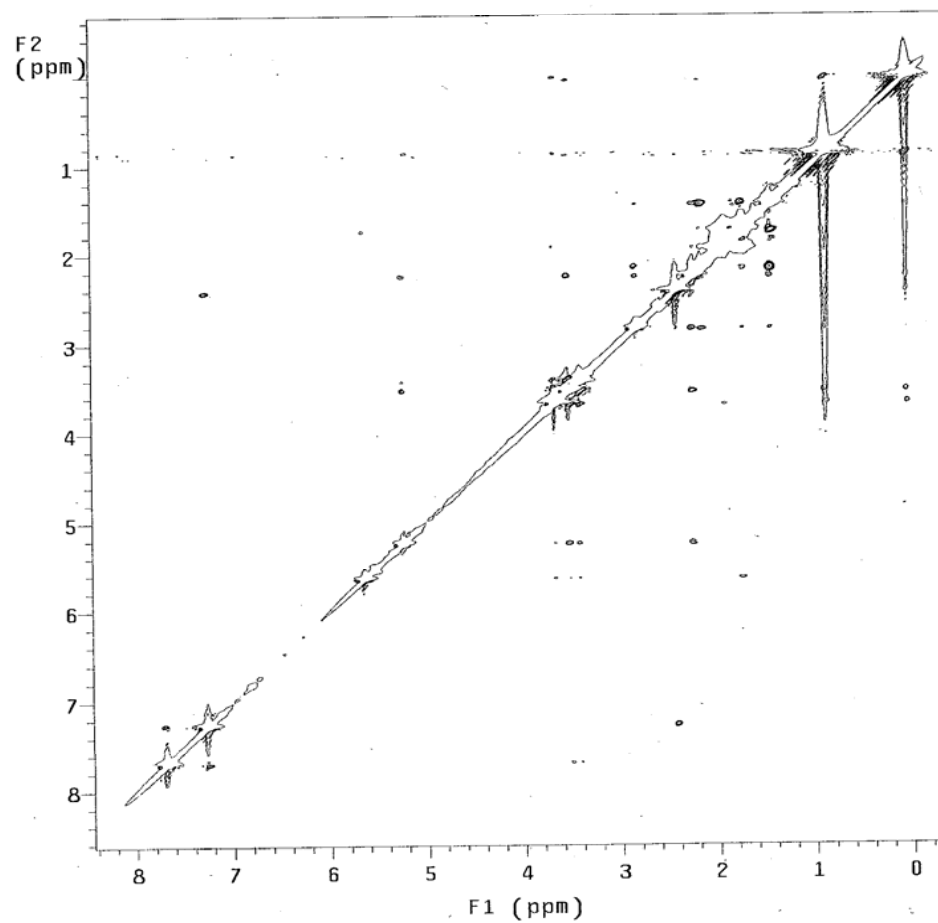

wxn518-3\_30Sep2013-14:24:46

Archive directory: /export/home/xiaona/vnmrsys/data  
Sample directory: wxn518-3\_30Sep2013-14:24:46

Pulse Sequence: NOESY

Solvent: CDCl<sub>3</sub>  
Temp. 25.0 C / 298.1 K  
File: NOESY  
INNOVA-500 "nmr03"

Relax. delay 2.000 sec  
Mixing 0.200 sec  
Acq. time 0.128 sec  
Width 8000.0 Hz  
2D Width 8000.0 Hz  
16 repetitions  
2 x 256 increments  
OBSERVE H1, 499.7288163 MHz  
DATA PROCESSING  
Gauss apodization 0.059 sec  
F1 DATA PROCESSING  
Gauss apodization 0.030 sec  
FT size 4096 x 4096  
Total time 5 hr, 23 min, 8 sec

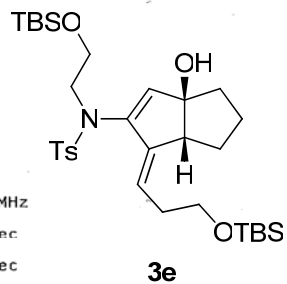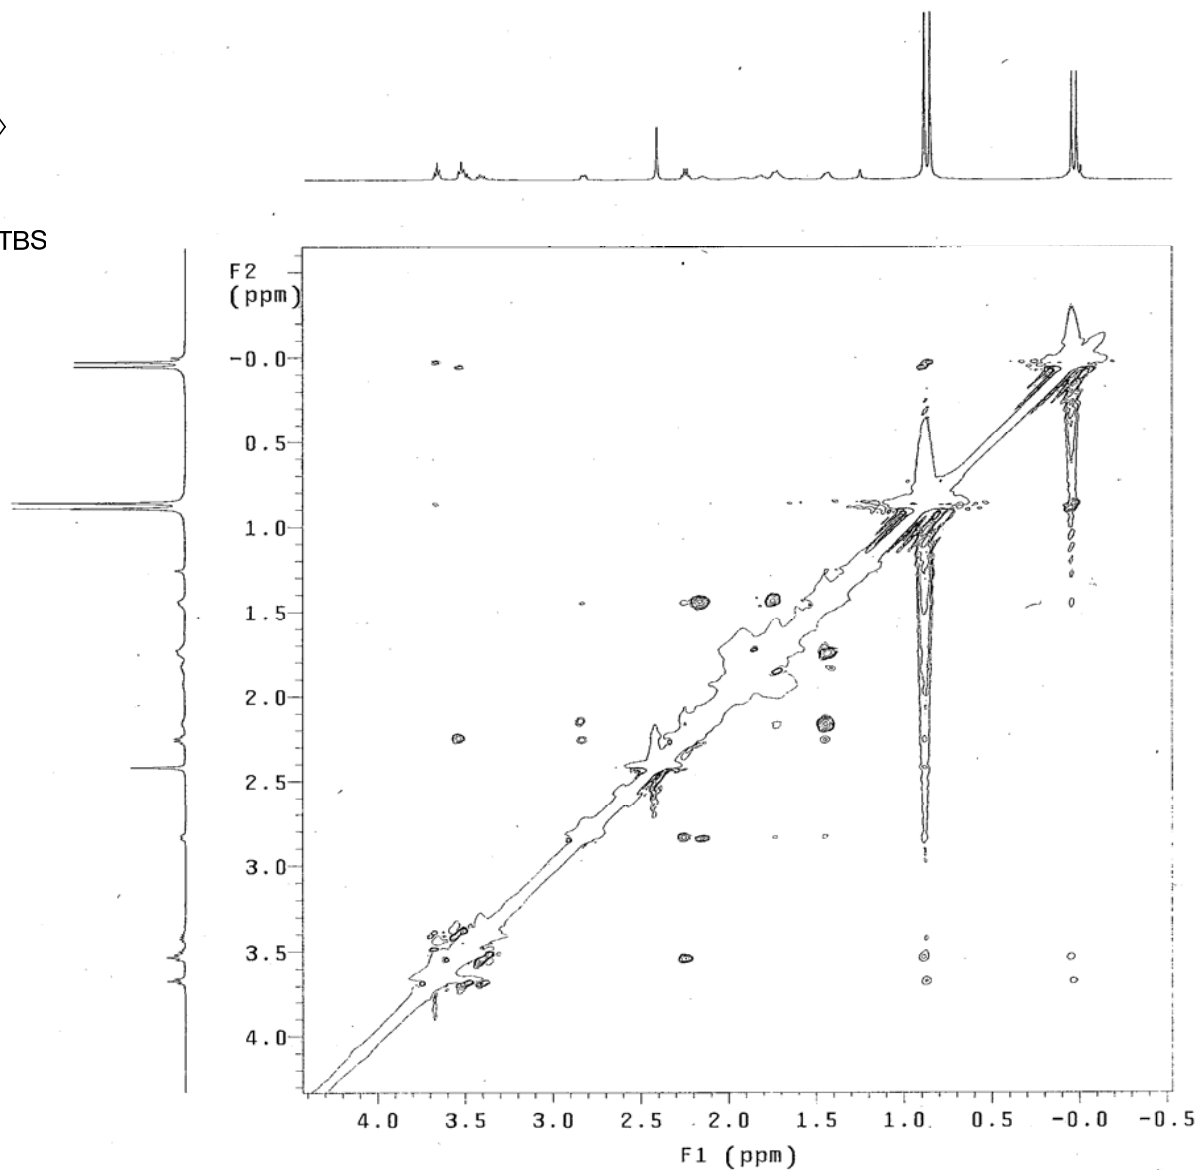



DEPT and NOESY for **12a-cis**

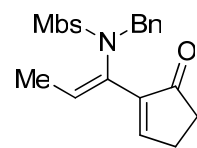

**12a-cis**

wxn528-4\_17Sep2013

Archive directory: /export/home/xiaona/vnmrsys/data  
Sample directory: wxn528-4\_17Sep2013

Pulse Sequence: DEPT  
Solvent: CDCl3  
Temp. 25.0 C / 298.1 K  
User: 1-14-87  
File: DEPT  
INOVA-500 "nmr03"

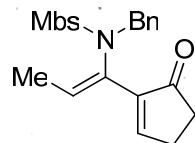

12a-cis

Relax. delay 1.000 sec  
Pulse 90.0 degrees  
Acq. time 1.299 sec  
Width 31446.5 Hz  
512 repetitions  
OBSERVE C13, 125.6568910 MHz  
DECOUPLE H1, 499.7312897 MHz  
Power 39 dB  
on during acquisition  
off during delay  
WALTZ-16 modulated  
DATA PROCESSING  
Line broadening 0.5 Hz  
FT size 131072  
Total time 19 min, 58 sec

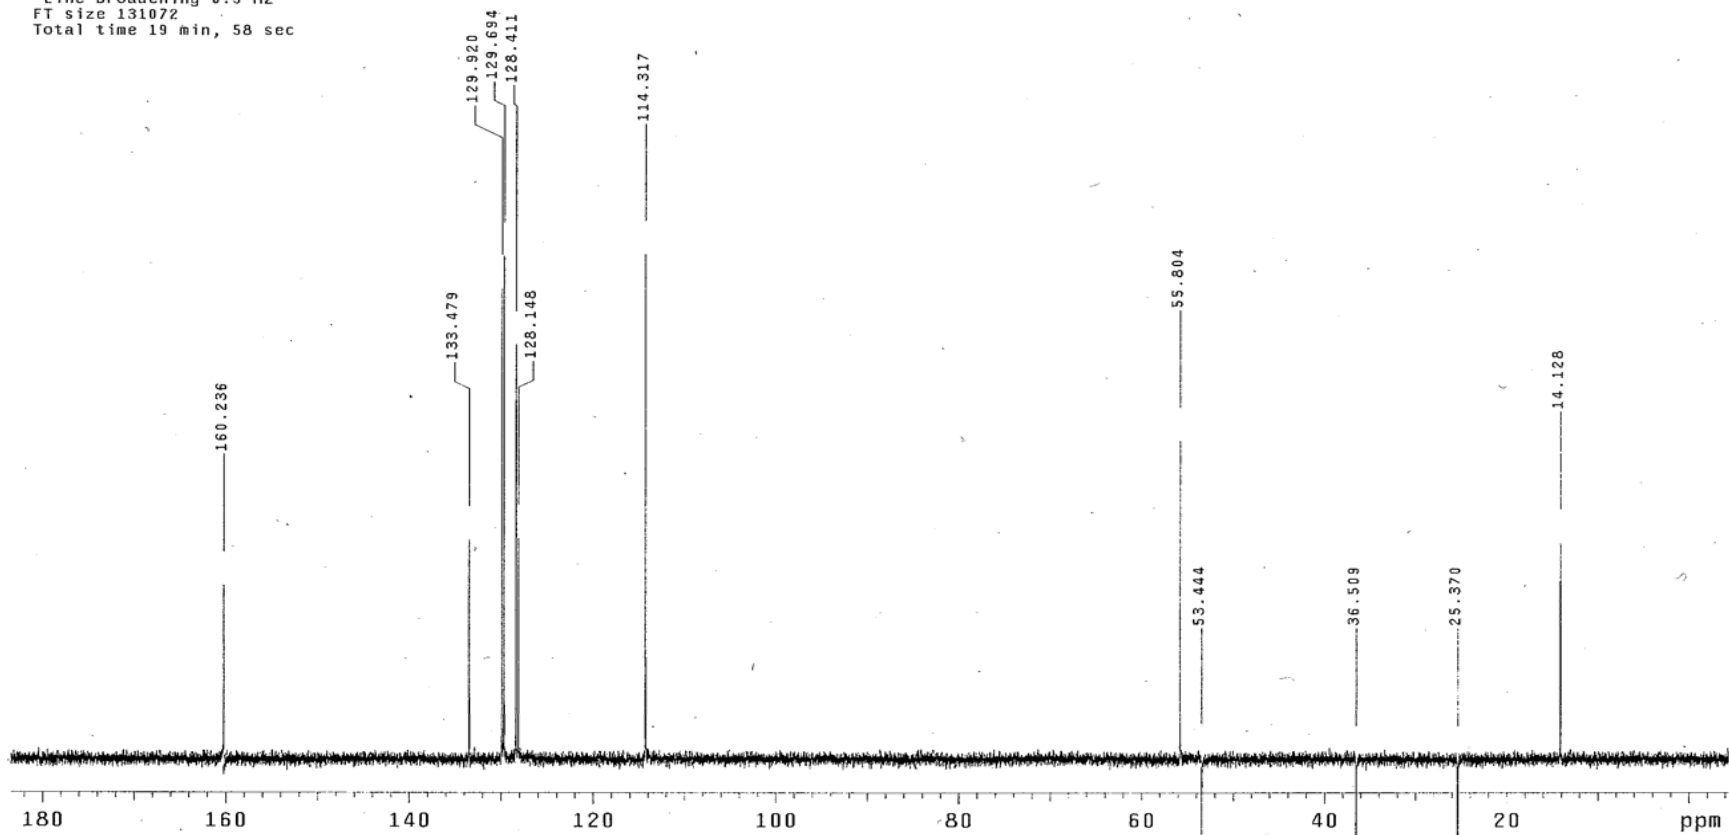

wxn528-4\_04Dec2013-17:30:07

Archive directory: /export/home/xiaona/vnmrsys/data  
Sample directory: wxn528-4\_04Dec2013-17:30:07

Pulse Sequence: NOESY

Solvent: CDC13  
Temp. 25.0 C / 298.1 K  
File: NOESY  
INOVA-500 "nmr03"

Relax. delay 1.000 sec  
Mixing 0.200 sec  
Acq. time 0.204 sec  
Width 5008.8 Hz  
2D Width 5006.3 Hz  
16 repetitions  
2 x 256 increments  
OBSERVE H1, 499.7288149 MHz  
DATA PROCESSING  
Gauss apodization 0.094 sec  
F1 DATA PROCESSING  
Gauss apodization 0.047 sec  
FT size 4096 x 4096  
Total time 3 hr, 17 min, 51 sec

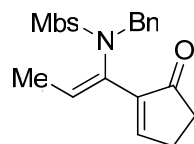

12a-cis

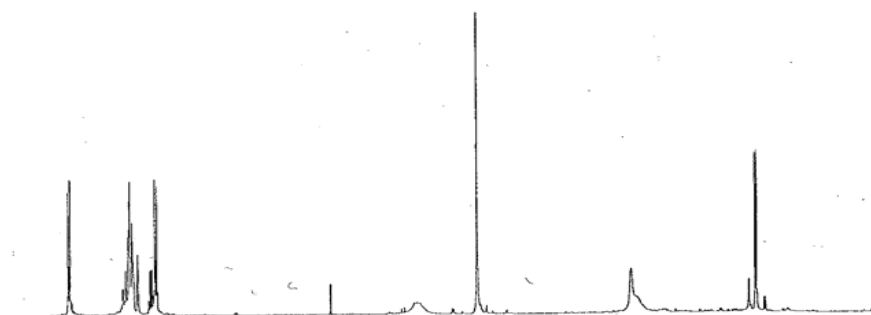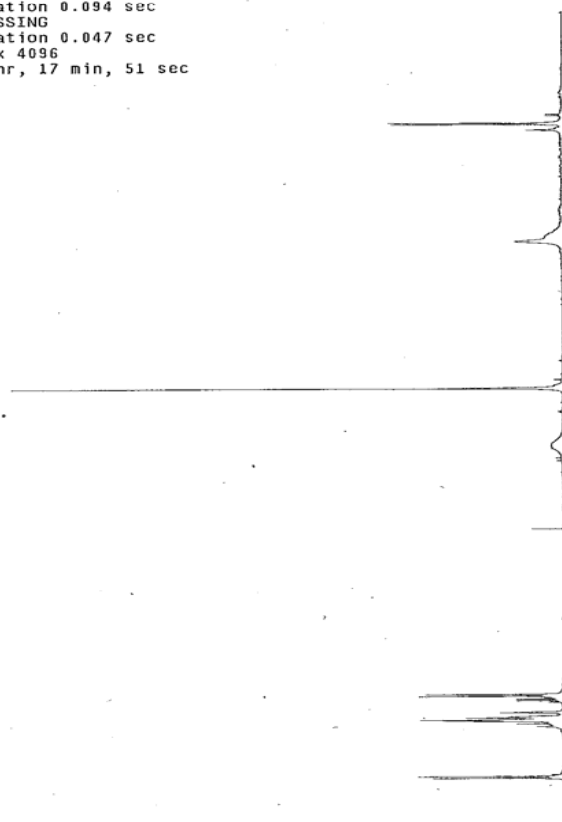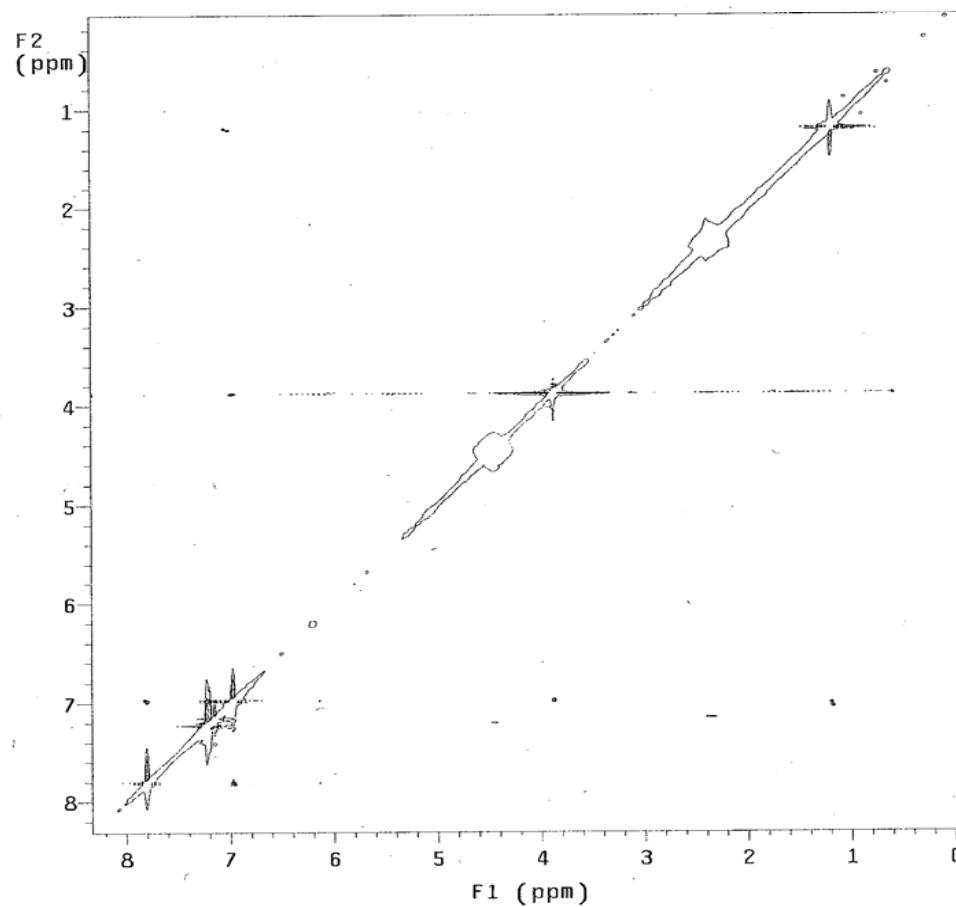

NOESY for **12b-cis** and **12b-trans**

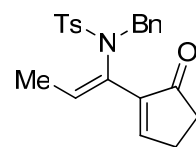

**12b-cis**

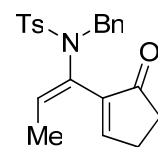

**12b-trans**

wxn563-1\_05Dec2013

Archive directory: /export/home/xiaona/vnmrsys/data  
Sample directory: wxn563-1\_05Dec2013

Pulse Sequence: NOESY

Solvent: CDCl3  
Temp. 25.0 C / 298.1 K  
File: NOESY  
INNOVA-500 "nmr03"

Relax. delay 1.000 sec  
Mixing 0.200 sec  
Acq. time 0.128 sec  
Width 8000.0 Hz  
2D Width 8000.0 Hz  
16 repetitions  
2 x 256 increments  
OBSERVE H1, 499.7288161 MHz  
DATA PROCESSING  
Gauss apodization 0.059 sec  
F1 DATA PROCESSING  
Gauss apodization 0.030 sec  
FT size 4096 x 4096  
Total time 3 hr, 6 min, 4 sec

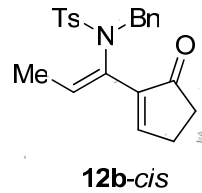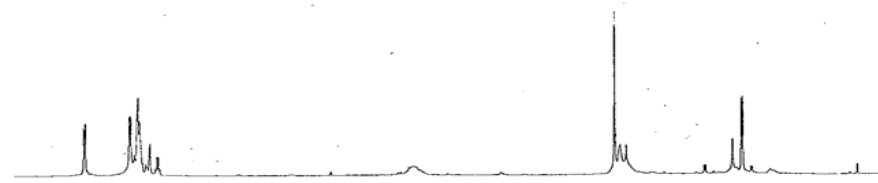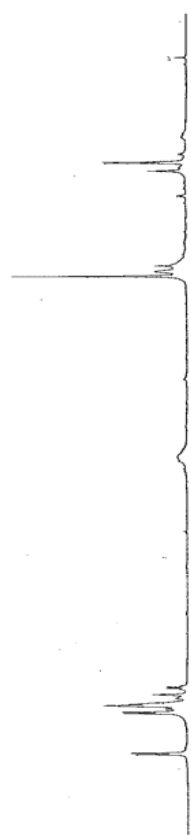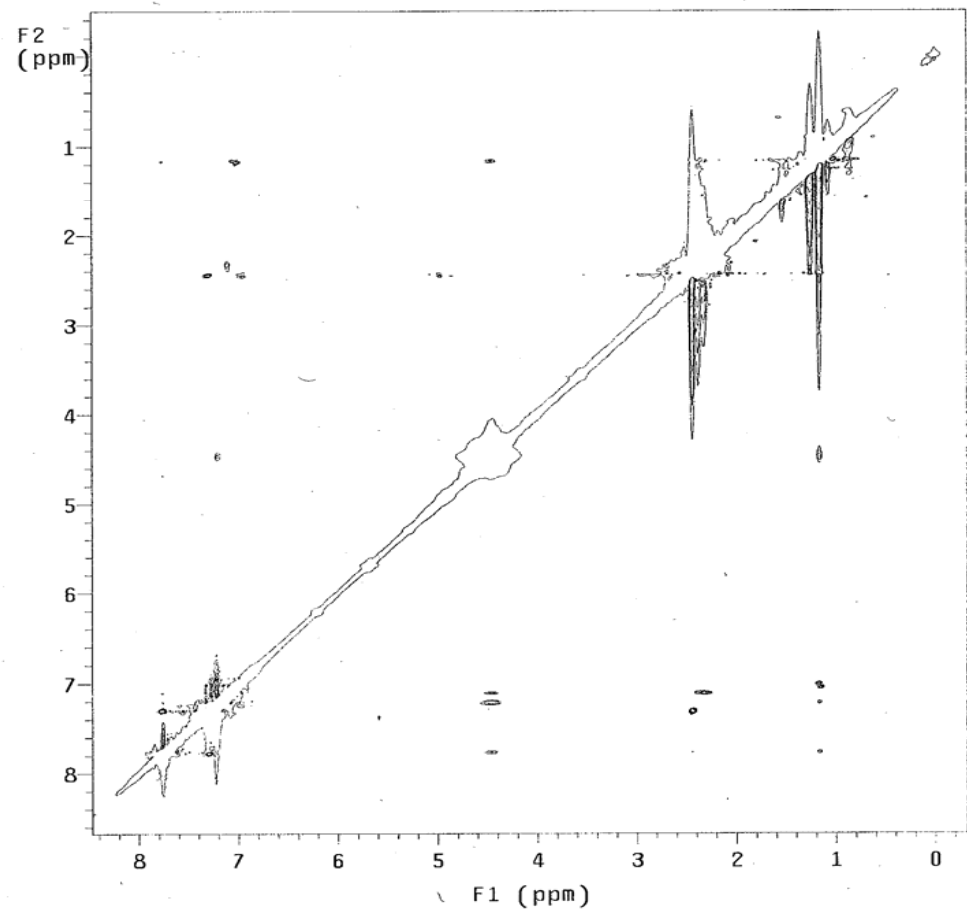

wxn563-2-2\_05Dec2013

Archive directory: /export/home/xiaona/vnmrsys/data  
Sample directory: wxn563-2-2\_05Dec2013

Pulse Sequence: NOESY

Solvent: CDCl<sub>3</sub>  
Temp: 25.0 C / 298.1 K  
File: NOESY  
INOVA-500 "nmr03"

Relax. delay 1.000 sec  
Mixing 0.200 sec  
Acq. time 0.128 sec  
Width 8000.0 Hz  
2D Width 8000.0 Hz  
16 repetitions  
2 x 256 increments  
OBSERVE H1, 499.7288170 MHz  
DATA PROCESSING  
Gauss apodization 0.059 sec  
F1 DATA PROCESSING  
Gauss apodization 0.030 sec  
FT size 4096 x 4096  
Total time 3 hr, 6 min, 4 sec

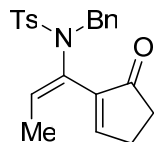

**12b-trans**

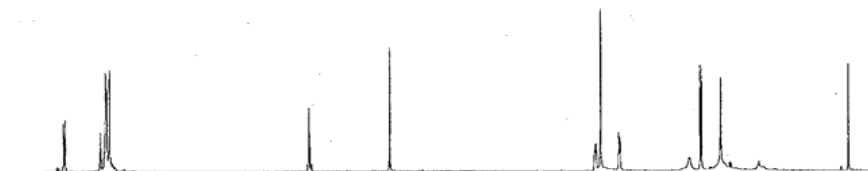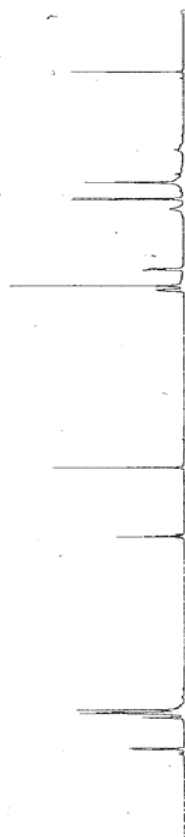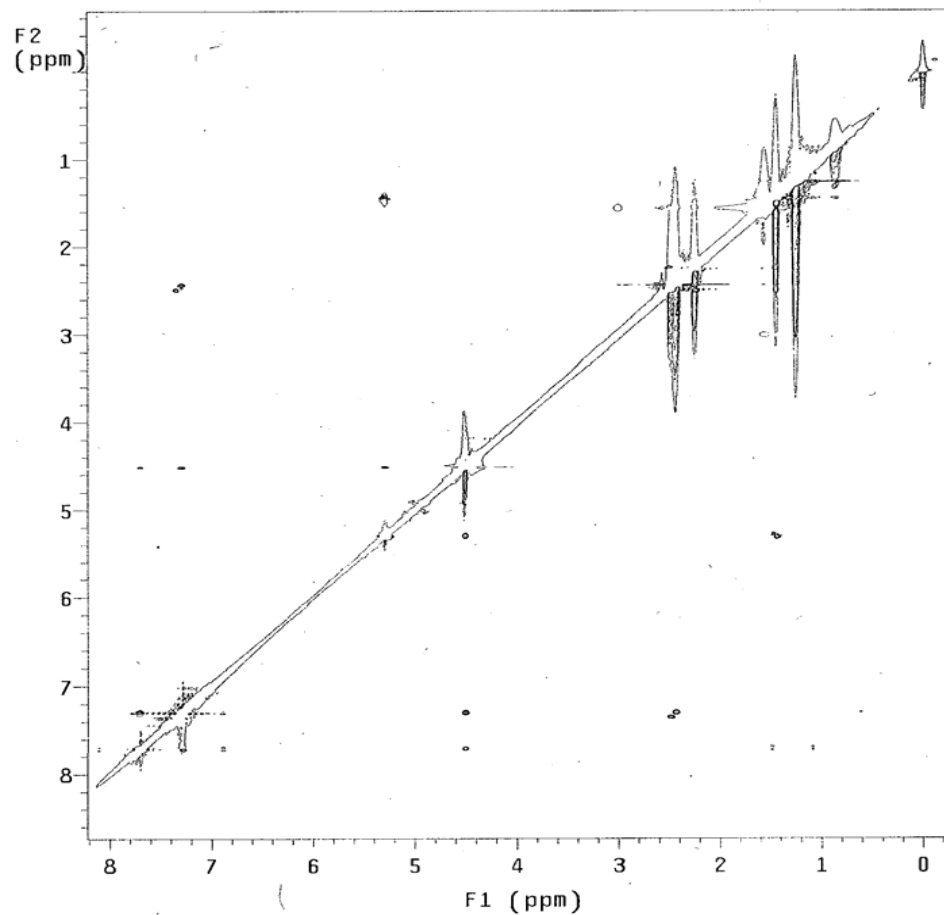

DEPT , NOESY and HMQC for **12c-cis** and **12c-trans**

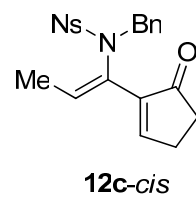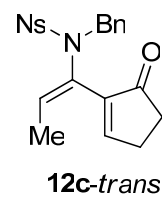

wxn553-2\_19Oct2013-13:02:57

Archive directory: /export/home/xiaona/vnmrsys/data  
Sample directory: wxn553-2\_19Oct2013-13:02:57

Pulse Sequence: DEPT

Solvent: CDCl3  
Temp. 25.0 C / 298.1 K  
File: DEPT  
INOVA-500 "nmr03"

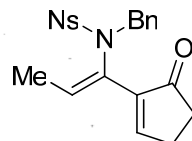

12c-cis

Relax. delay 1.000 sec  
Pulse 90.0 degrees  
Acq. time 1.198 sec  
Width 25157.2 Hz  
160 repetitions  
OBSERVE C13, 100.5263821 MHz  
DECOUPLE H1, 399.7885243 MHz  
Power 43 dB  
on during acquisition  
off during delay  
WALTZ-16 modulated  
DATA PROCESSING  
Line broadening 0.8 Hz  
FT size 65536  
Total time 19 min, 6 sec

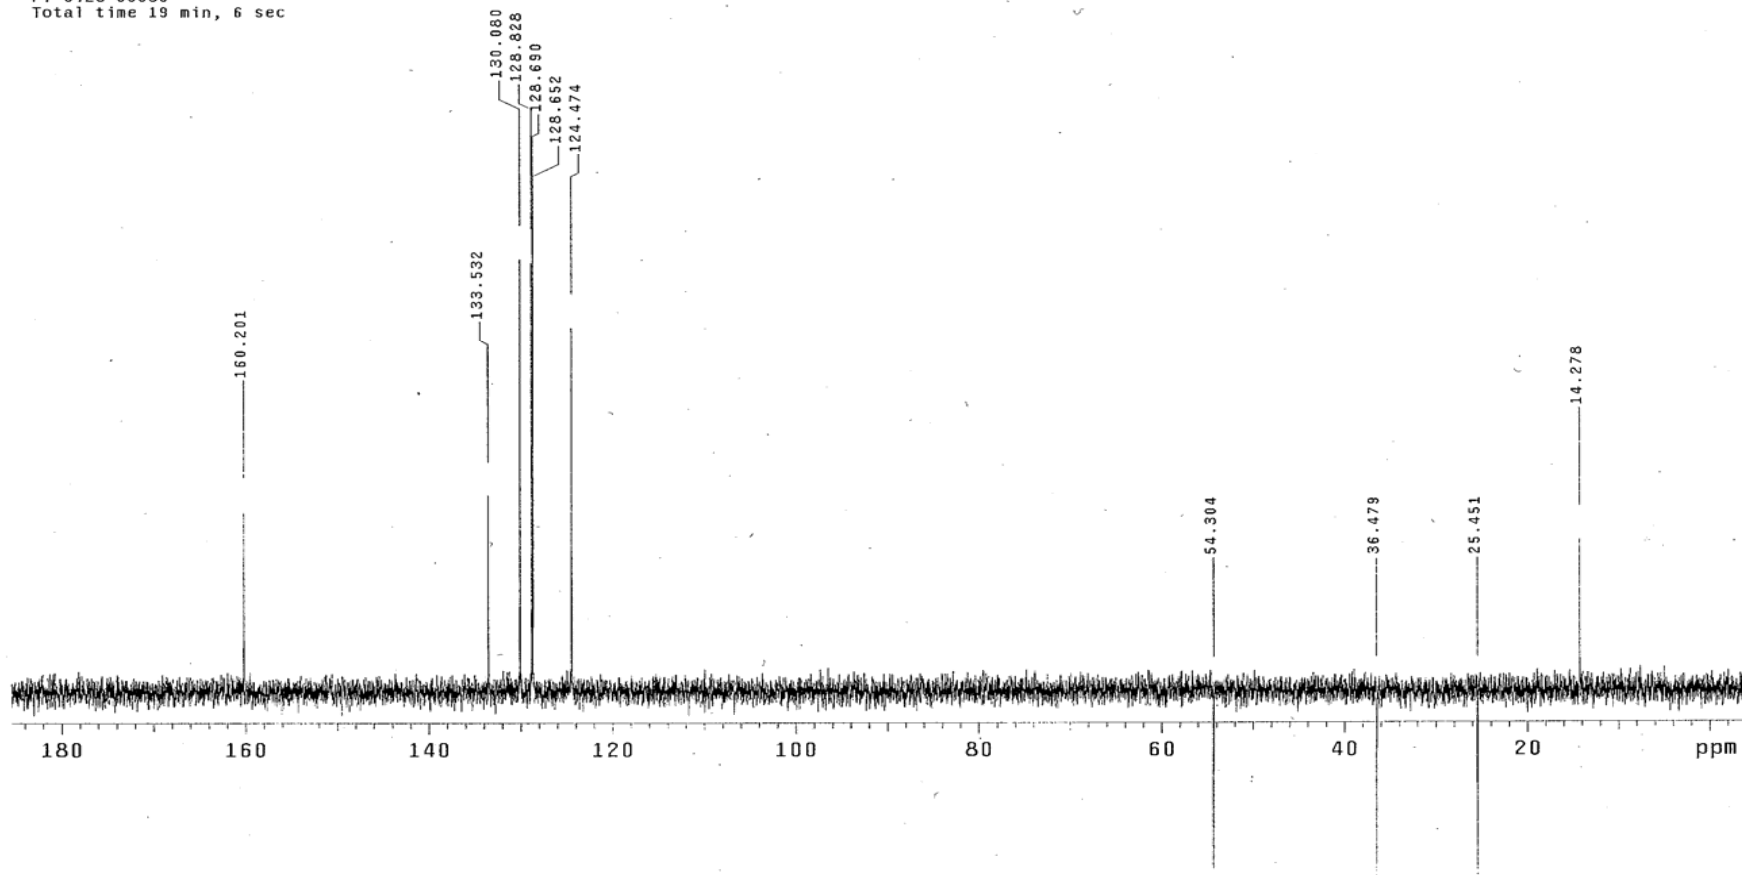



wxn553-2\_19oct2013

Archive directory: /export/home/xiaona/vnmrsys/data  
Sample directory: wxn553-2\_19oct2013

Pulse Sequence: NOESY  
Solvent: CDCl3  
Temp. 25.0 C / 298.1 K  
File: NOESY  
INOVA-500 "nmr03"

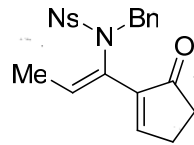

**12c-cis**

Relax. delay 2.000 sec  
Mixing 0.200 sec  
Acq. time 0.128 sec  
Width 8000.0 Hz  
2D Width 8000.0 Hz  
16 repetitions  
2 x 256 increments  
OBSERVE H1, 499.7288153 MHz  
DATA PROCESSING  
Gauss apodization 0.059 sec  
F1 DATA PROCESSING  
Gauss apodization 0.030 sec  
FT size 4096 x 4096  
Total time 5 hr, 23 min, 8 sec

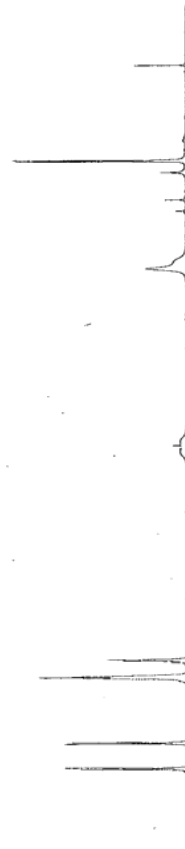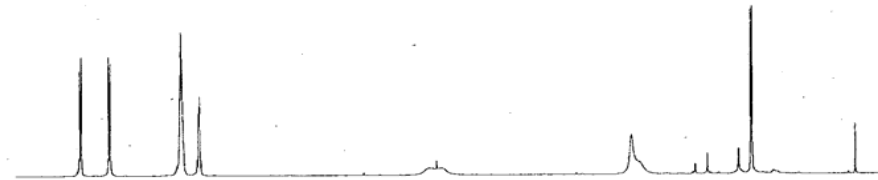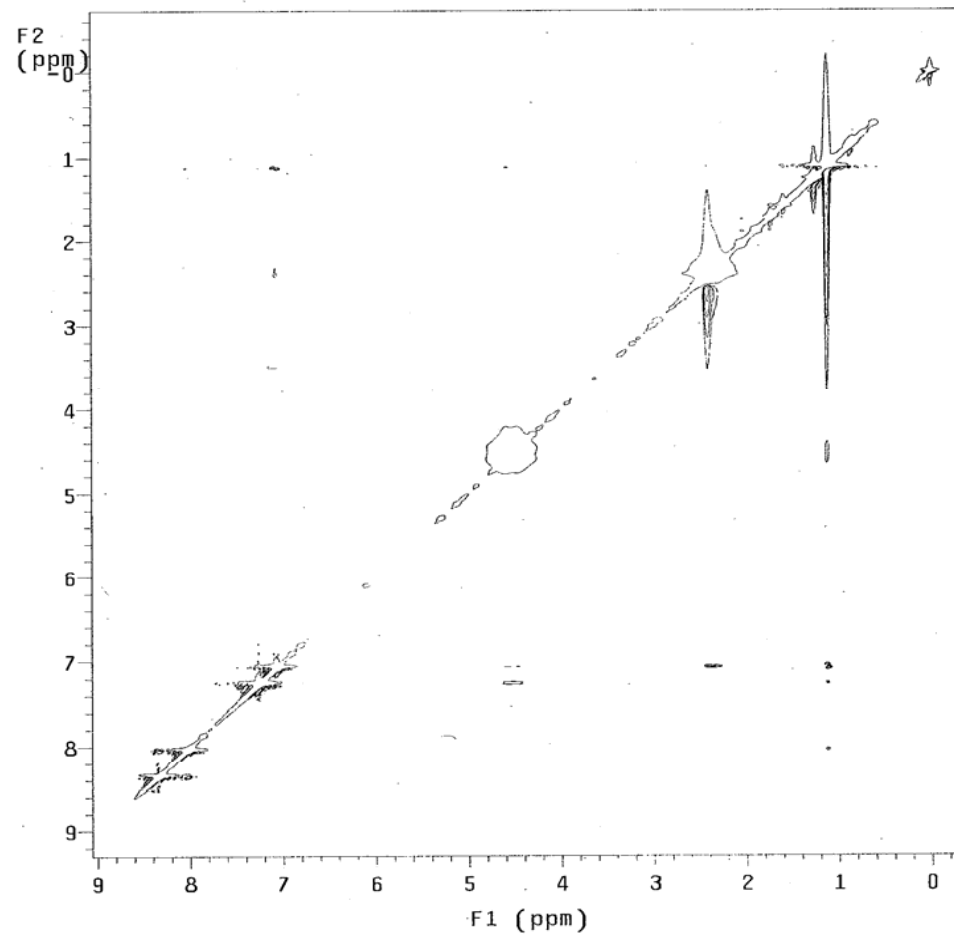

wxn553-2\_18Oct2013-21:59:33

Archive directory: /export/home/xiaona/vnmrsys/data  
Sample directory: wxn553-2\_18Oct2013-21:59:33

Pulse Sequence: gHMQC

Solvent: CDCl3  
Temp. 25.0 C / 298.1 K  
File: gHMQC  
INNOVA-500 "nmr03"

Relax. delay 1.000 sec  
Acq. time 0.160 sec  
Width 6387.7 Hz  
2D Width 17090.4 Hz  
16 repetitions  
2 x 512 increments  
OBSERVE H1, 399.7865214 MHz  
DECOUPLE C13, 100.5339172 MHz  
Power 46 dB  
on during acquisition  
off during delay  
GARP-1 modulated  
DATA PROCESSING  
Gauss apodization 0.074 sec  
F1 DATA PROCESSING  
Gauss apodization 0.055 sec  
FT size 4096 x 8192  
Total time 5 hr, 35 min, 32 sec

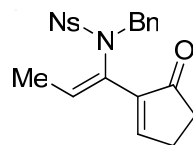

12c-cis

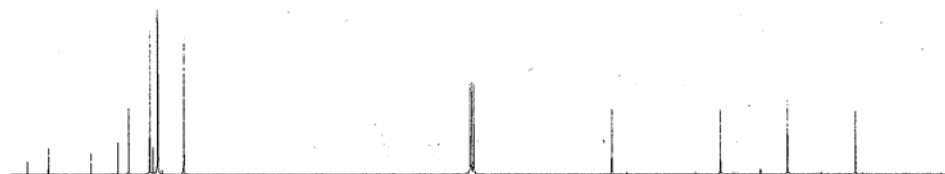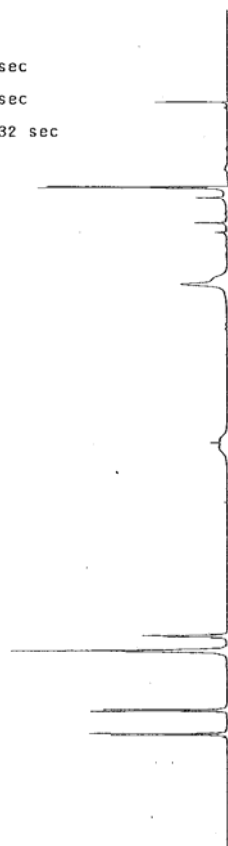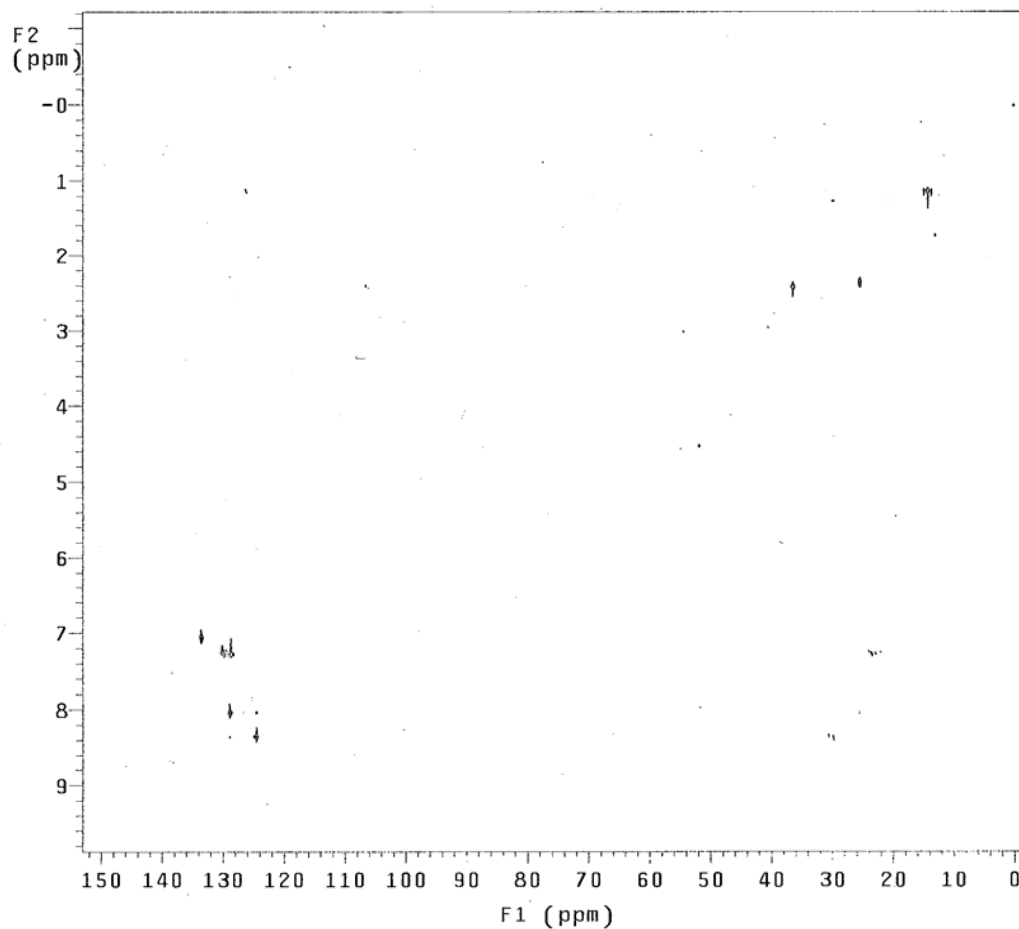

wxn553-2\_18Oct2013-21:59:33

Archive directory: /export/home/xiaona/vnmrsys/data  
Sample directory: wxn553-2\_18Oct2013-21:59:33

Pulse Sequence: gHMOC  
Solvent: CDCl3  
Temp. 25.0 C / 298.1 K  
File: gHMOC  
INOVA-500 "nmr03"

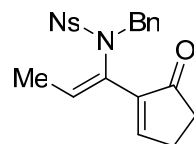

12c-cis

Relax. delay 1.000 sec  
Acq. time 0.160 sec  
Width 6387.7 Hz  
2D Width 17090.4 Hz  
16 repetitions  
2 x 512 increments  
OBSERVE H1, 399.7865214 MHz  
DECOUPLE C13, 100.5339172 MHz  
Power 46 dB  
on during acquisition  
off during delay  
GARP-1 modulated  
DATA PROCESSING  
Gauss apodization 0.074 sec  
F1 DATA PROCESSING  
Gauss apodization 0.055 sec  
FT size 2048 x 8192  
Total time 5 hr, 35 min, 32 sec

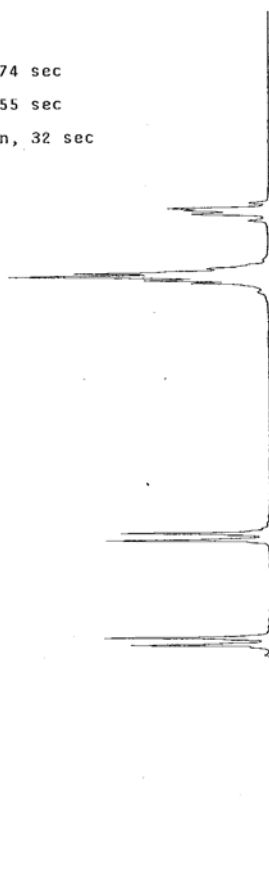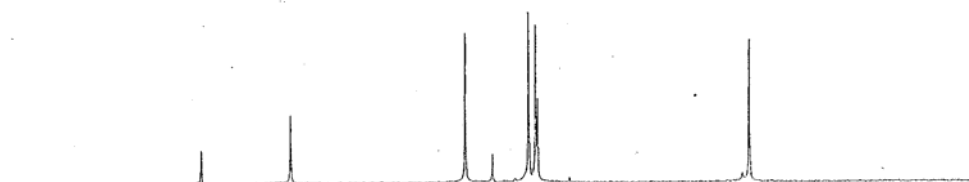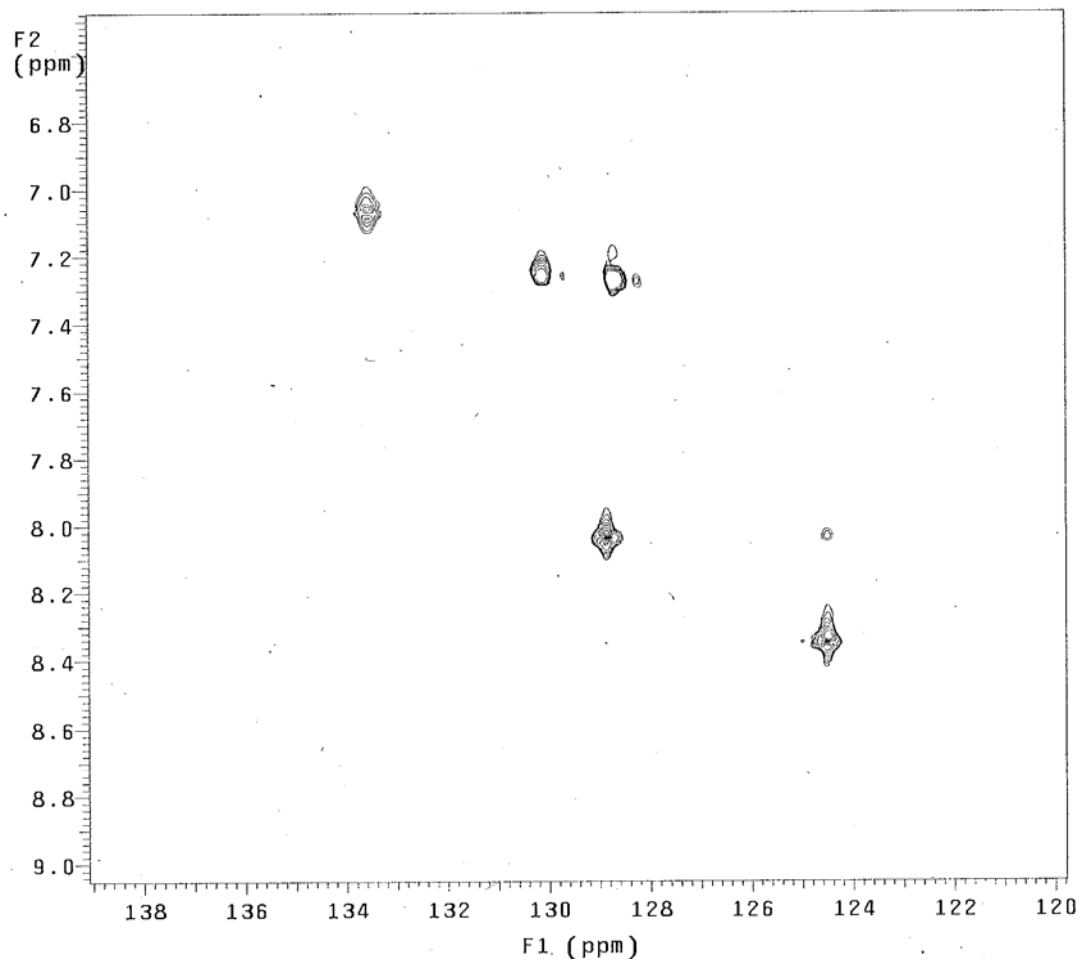

wxn553-3\_19Oct2013

Archive directory: /export/home/xiaona/vnmrsys/data  
Sample directory: wxn553-3\_19Oct2013

Pulse Sequence: DEPT  
Solvent: CDCl<sub>3</sub>  
Temp. 25.0 C / 298.1 K  
File: DEPT  
INOVA-500 "nmr03"

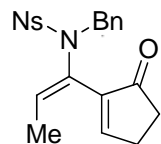

12c-trans

Relax. delay 1.000 sec  
Pulse 90.0 degrees  
Acq. time 1.198 sec  
Width 25157.2 Hz  
320 repetitions  
OBSERVE C13, 100.5263821 MHz  
DECOUPLE H1, 399.7885243 MHz  
Power 43 dB  
on during acquisition  
off during delay  
WALTZ-16 modulated  
DATA PROCESSING  
Line broadening 0.8 Hz  
FT size 65536  
Total time 19 min, 6 sec

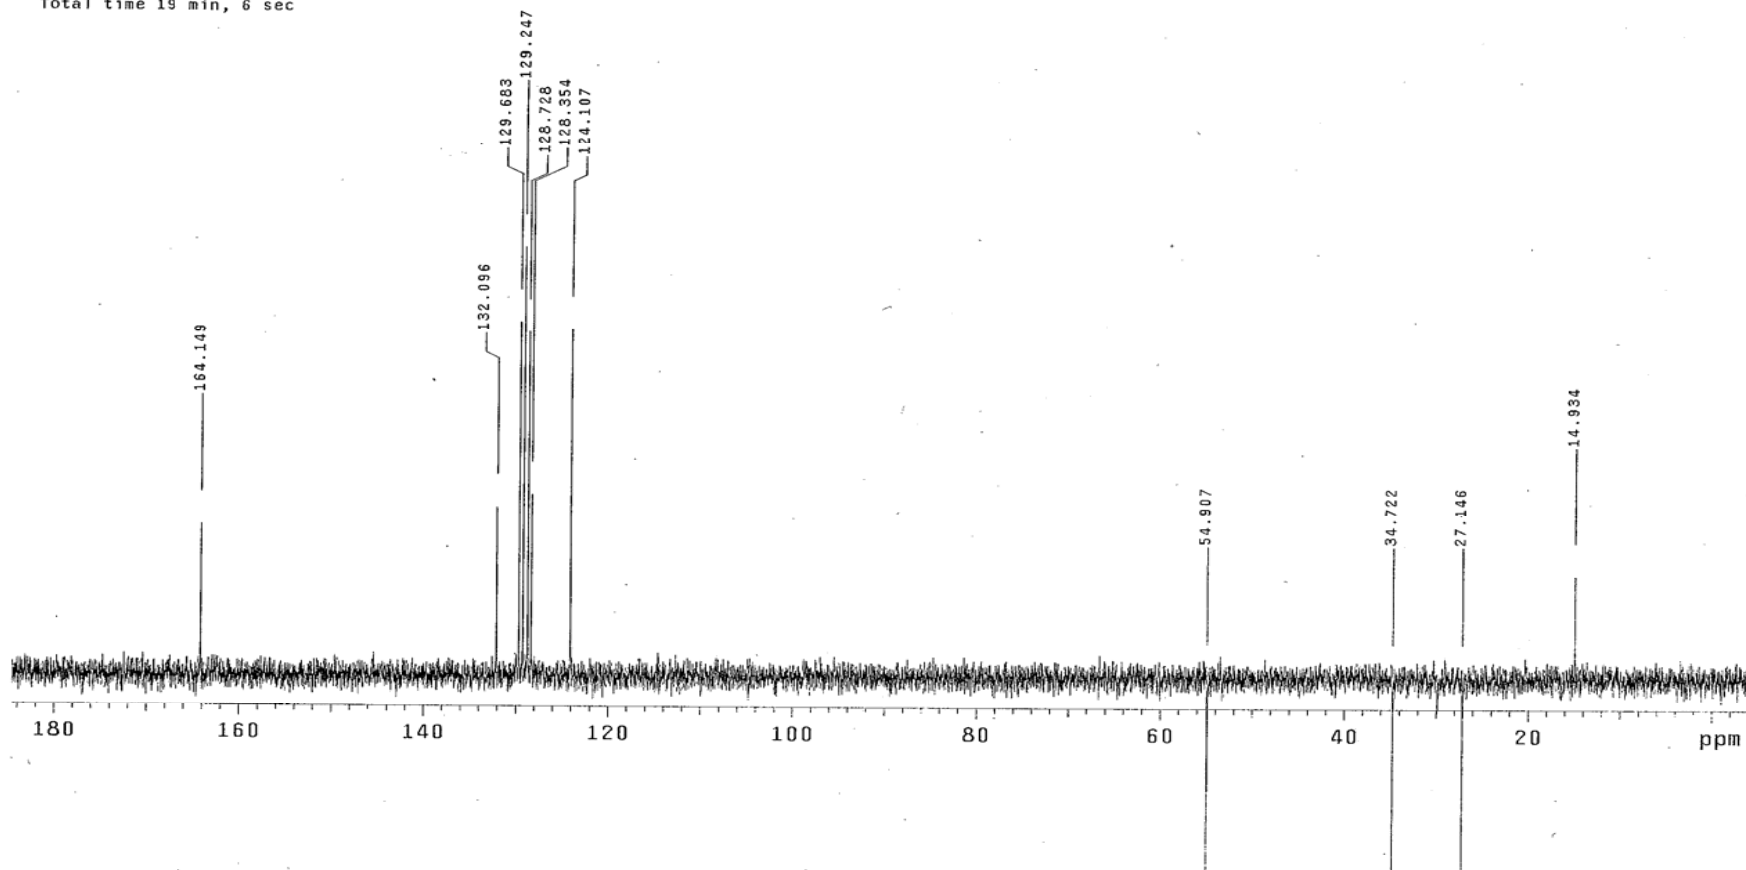

wxn553-3\_18Oct2013-22:05:45

Archive directory: /export/home/xiaona/vnmrsys/data  
Sample directory: wxn553-3\_18Oct2013-22:05:45

Pulse Sequence: NOESY  
Solvent: CDCl3  
Temp. 25.0 C / 298.1 K  
File: NOESY  
INOVA-500 "nmr03"

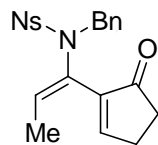

12c-trans

Relax. delay 2.000 sec  
Mixing 0.200 sec  
Acq. time 0.128 sec  
Width 8000.0 Hz  
2D Width 8000.0 Hz  
16 repetitions  
2 x 256 increments  
OBSERVE H1, 499.7288158 MHz  
DATA PROCESSING  
Gauss apodization 0.059 sec  
F1 DATA PROCESSING  
Gauss apodization 0.030 sec  
FT size 4096 x 4096  
Total time 5 hr, 23 min, 8 sec

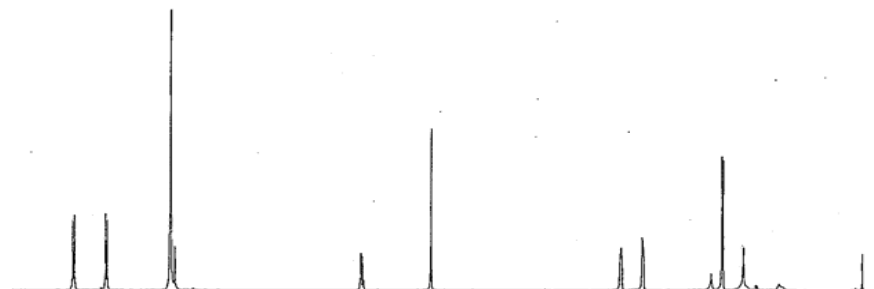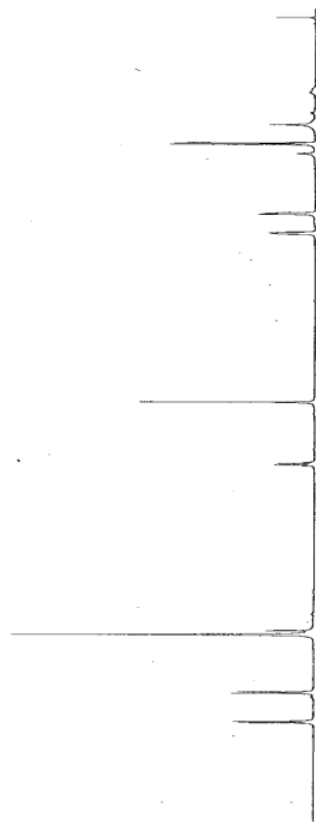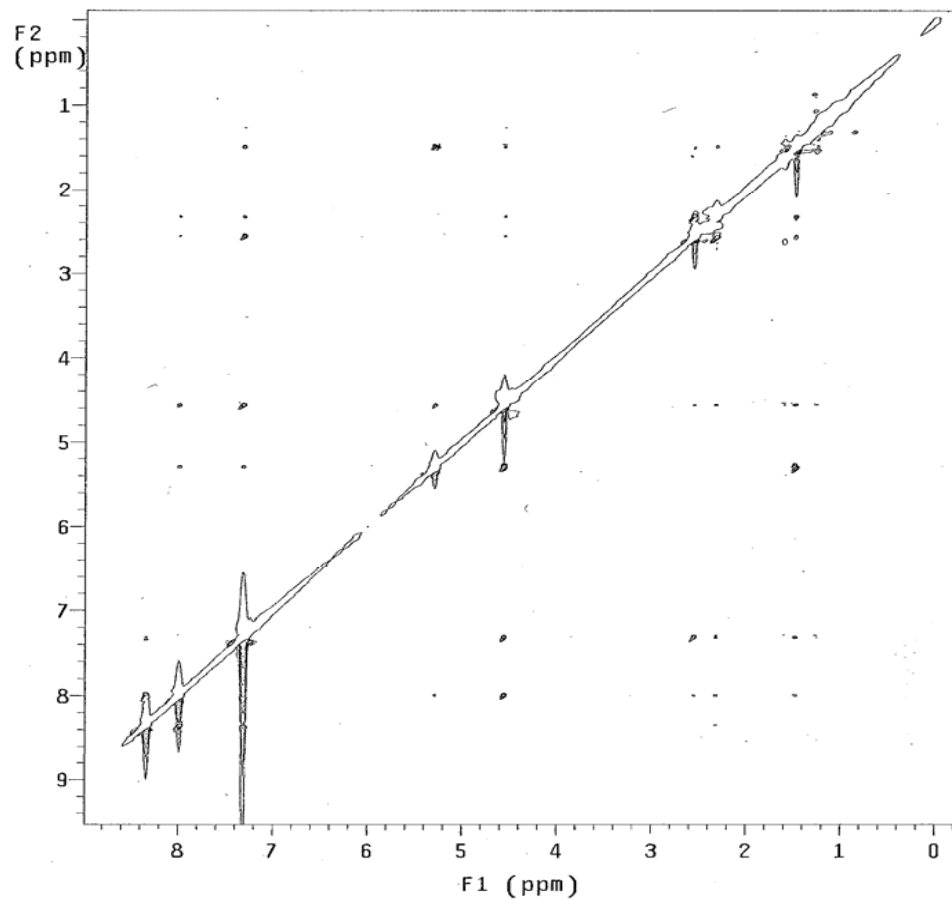

wxn553-3\_18Oct2013-22:05:45

Archive directory: /export/home/xiaona/vnmrsys/data  
Sample directory: wxn553-3\_18Oct2013-22:05:45

Pulse Sequence: gHMOC

Solvent: CDCl3  
Temp. 25.0 C / 298.1 K  
File: gHMOC  
INOVA-500 "nmr03"

Relax. delay 1.000 sec  
Acq. time 0.128 sec  
Width 8000.0 Hz  
2D Width 21361.8 Hz  
16 repetitions  
2 x 512 increments  
OBSERVE H1, 499.7288158 MHz  
DECOUPLE C13, 125.6662987 MHz  
Power 44 dB  
on during acquisition  
off during delay  
W40\_hcx4765 modulated  
DATA PROCESSING  
Gauss apodization 0.059 sec  
F1 DATA PROCESSING  
Gauss apodization 0.044 sec  
FT size 2048 x 8192  
Total time 5 hr, 25 min, 52 sec

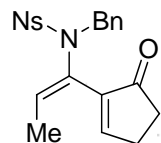

12c-trans

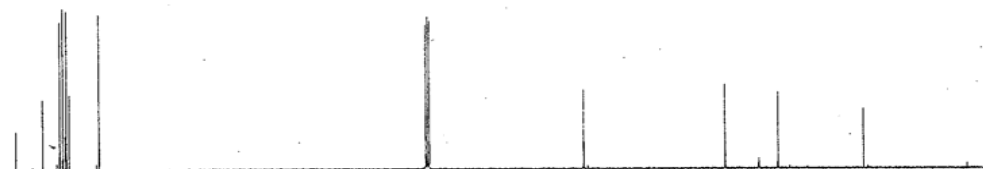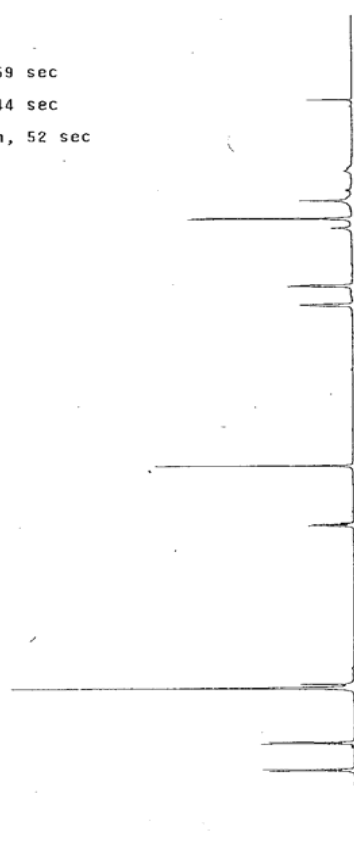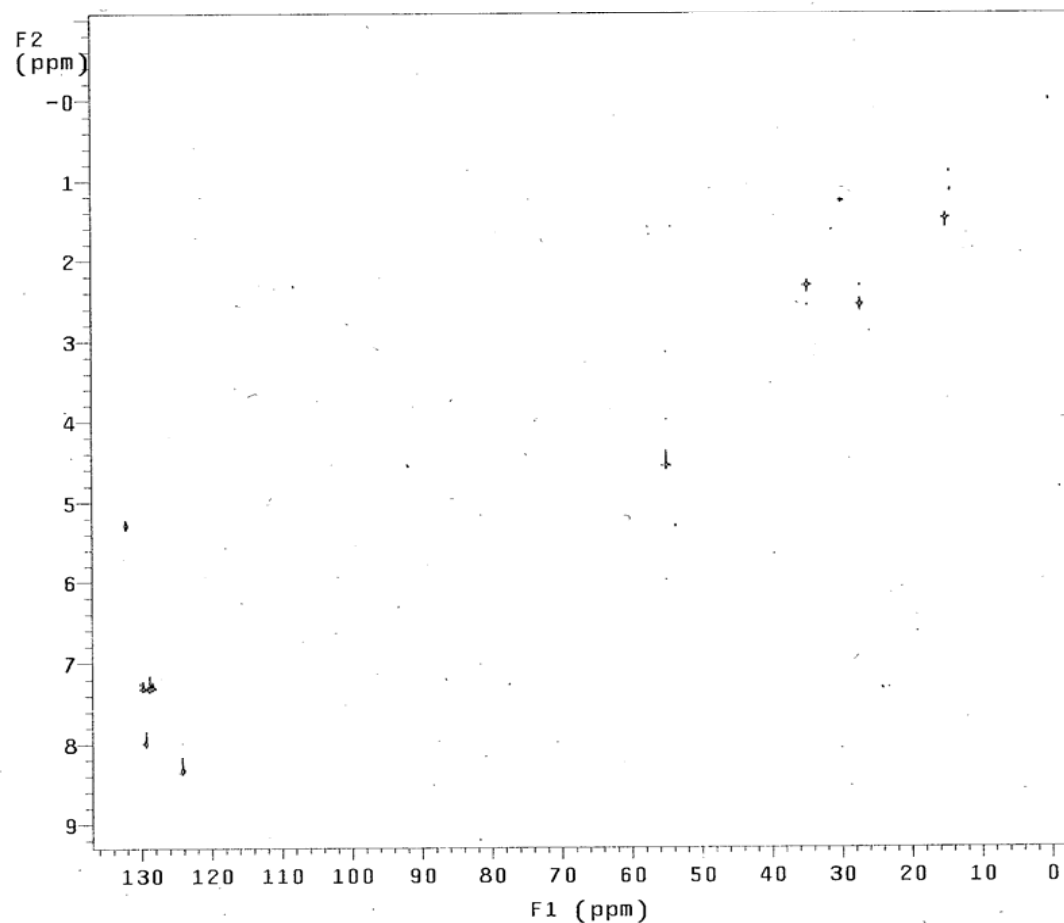

wxn553-3\_18Oct2013-22:05:45

Archive directory: /export/home/xiaona/vnmrsys/data  
Sample directory: wxn553-3\_18Oct2013-22:05:45

Pulse Sequence: gHMQC

Solvent: CDCl3  
Temp. 25.0 C / 298.1 K  
File: gHMQC  
INOVA-500 "nmr03"

Relax. delay 1.000 sec  
Acq. time 0.128 sec  
Width 8000.0 Hz  
2D Width 21361.8 Hz  
16 repetitions  
2 x 512 increments  
OBSERVE H1, 499.7288158 MHz  
DECOUPLE C13, 125.6662987 MHz  
Power 44 dB  
on during acquisition  
off during delay  
W40\_hcx4765 modulated  
DATA PROCESSING  
Gauss apodization 0.059 sec  
F1 DATA PROCESSING  
Gauss apodization 0.044 sec  
FT size 2048 x 8192  
Total time 5 hr, 25 min, 52 sec

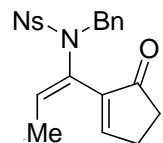

**12c-trans**

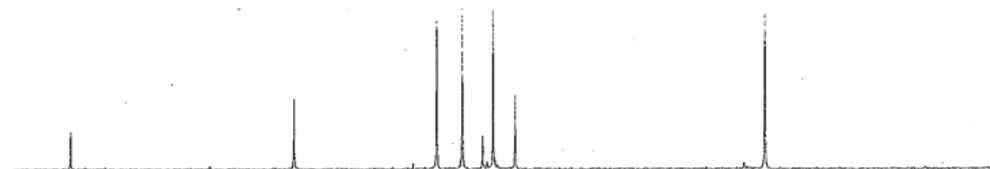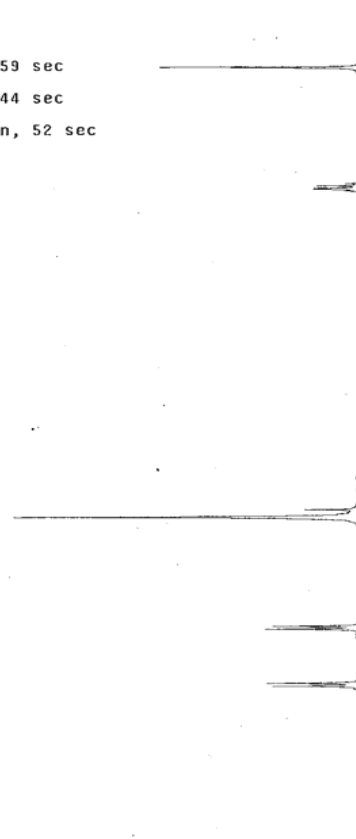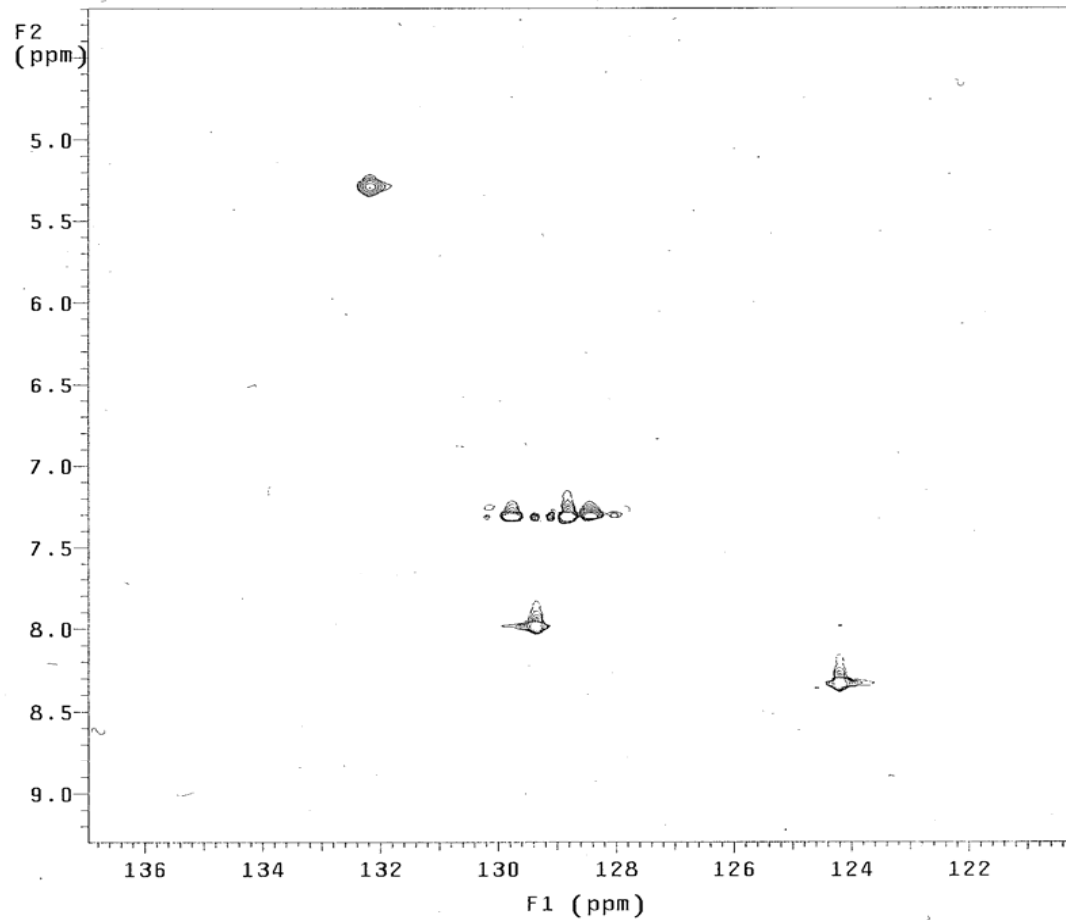

Supplement: ja502252t_si_002.pdf [file ja502252t_si_002.pdf]
