# Supplementary material
Source: PubMed Central journal article supplement (PMC4353010)
Supplement: ja502252t_si_003.pdf [file ja502252t_si_003.pdf]

# Torquoselective Ring-Opening of Fused Cyclobutenamides: Evidence for a *Cis,Trans*-Cyclooctadienone Intermediate

Xiao-Na Wang,<sup>†</sup> Elizabeth H. Krenske,<sup>\*,‡</sup> Ryne C. Johnston,<sup>‡,§</sup>  
K. N. Houk,<sup>\*,¶</sup> and Richard P. Hsung<sup>\*,†</sup>

<sup>†</sup>Division of Pharmaceutical Sciences and Department of Chemistry, University of Wisconsin, Madison, WI 53705

<sup>‡</sup>School of Chemistry and Molecular Biosciences, The University of Queensland, Brisbane, QLD 4072, Australia

<sup>¶</sup>Department of Chemistry and Biochemistry, University of California, Los Angeles, CA 90095

## *Supporting Information Part 3*

| <u>Contents</u>                                                                                                                          | <u>Page</u> |
|------------------------------------------------------------------------------------------------------------------------------------------|-------------|
| Theoretical Investigations of the Roles of Protonation and Hydrogen Bonding in the Rearrangements of 4,6- and 4,5-Fused Cyclobutenamides | S85         |
| Theoretical Calculations                                                                                                                 | S89         |
| Computed Geometries and Energies                                                                                                         | S90         |
| Complete Citation for Reference 11                                                                                                       | S126        |

# Theoretical Investigations of the Roles of Protonation and Hydrogen Bonding in the Rearrangements of 4,6- and 4,5-Fused Cyclobutenamides

## 4,6-Fused Cyclobutenamides

The computed barrier for the Nazarov cyclization of *cis,trans*-cyclooctadienone **2-*E,E*** is prohibitively high (**TS7**,  $\Delta G^\ddagger = 47.5$  kcal/mol, see Figure 2 of the paper). We propose that the cyclization is accelerated by protonation of the carbonyl oxygen, and that the source of the proton is an adventitious water molecule. Experimental evidence supporting the notion of  $H^+$  catalysis is found in the observations that the thermal rearrangement of cyclobutenamide **1** to 5,5-bicyclic product **3** is inhibited by either base or 4 Å molecular sieves (Table 1, entries 4 and 5).

We explored the possibility that the barrier for the Nazarov cyclization step could be lowered by hydrogen bonding between the carbonyl oxygen of **2-*E,E*** and a water molecule. The energy profile for such a process is shown in Figure S1. Hydrogen bonding to the carbonyl oxygen in the TS for Nazarov cyclization (**[H<sub>2</sub>O]TS7**) is predicted not to be sufficiently stabilizing to allow the Nazarov cyclization to proceed at an experimentally significant rate. The barrier is lowered by only 5.8 kcal/mol compared to the thermal reaction. Additionally, complexation to a single water molecule is disfavored by over 7 kcal/mol (Figure S2).

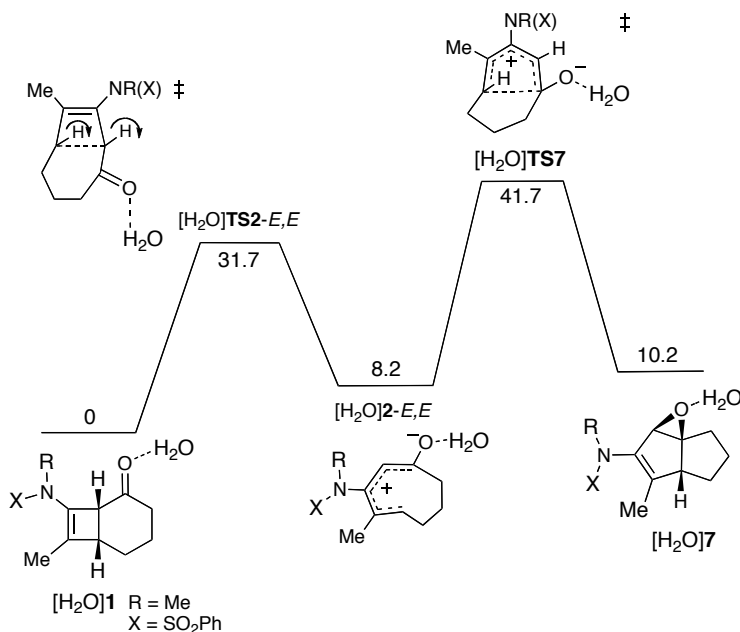

**Figure S1.** Free energy profile for rearrangement of 4,6-fused cyclobutenamide **1** as a hydrogen-bonded complex with a water molecule.  $\Delta G$  in kcal/mol.

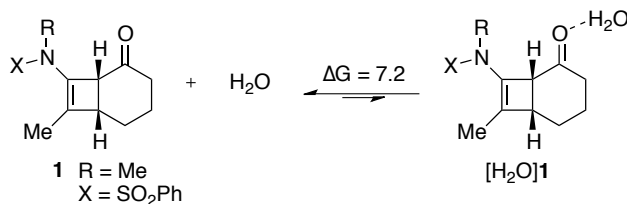

**Figure S2.** Equilibrium for water complexation to **1**.

In light of these results, protonation appears to be the only feasible possibility for accelerating the Nazarov cyclization. Figure S3 shows the free energy profile for rearrangement of protonated cyclobutenamide  $[H^+]1$ , displaying not only the Nazarov cyclization step (reproduced from Figure 2 of the paper) but also the preceding ring-opening of cyclobutenamide **1** and the subsequent reactions of the 5,5-bicyclic species  $[H^+]7$ . The barrier for ring-opening of cyclobutenamide **1** is decreased by 11 kcal/mol upon protonation of the carbonyl oxygen ( $\Delta G^\ddagger = 21.3$  kcal/mol, cf. 32.3 kcal/mol for the uncatalyzed reaction). Therefore,  $H^+$  catalysis of the ring-opening of **1** cannot be ruled out. However, catalysis of this step is not an absolute requirement, as the uncatalyzed barrier is low enough to be compatible with the reaction temperature (100–120 °C).

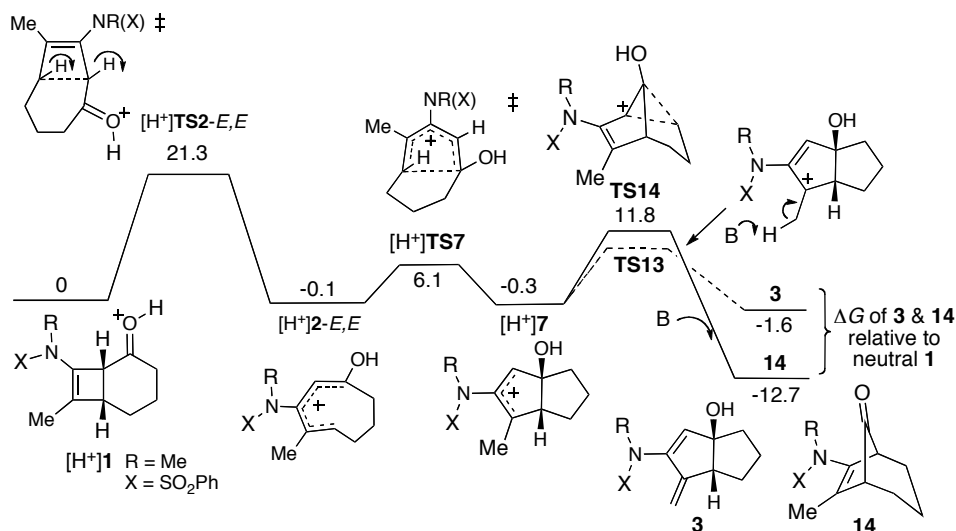

**Figure S3.** Free energy profile for  $H^+$ -catalyzed rearrangements of cyclobutenamide **1**.

Protonation of the carbonyl oxygen need not occur solely at the level of the intermediate cyclooctadienone. The starting cyclobutenamide may also be protonated. However, calculations (Figure S4) indicate that the carbonyl oxygen is not the most basic site of cyclobutenamide **1**; the enamide  $\beta$ -carbon is significantly more basic than oxygen. Moreover,  $C$ -protonation, if it occurred, would be expected to allow entry into the alternative rearrangement pathway that furnishes Ficini-type amido-dienes (see below). Experimentally, Ficini-type amido-dienes are not obtained during the thermal rearrangements of 4,6-fused cyclobutenamides **1**.

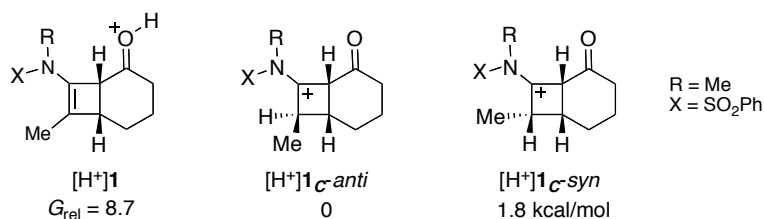

**Figure S4.** Relative energies of isomeric protonated cyclobutenamides.

The 5,5-bicyclic intermediate  $[H^+]7$  resulting from the Nazarov cyclization of  $[H^+]2-E,E$  (Figure S3) has two possible fates: (i) it may undergo deprotonation (**TS13**) to give the observed 5,5-bicyclic product **3**, or (ii) it may undergo a 1,2-alkyl shift (**TS14**) to afford a bicyclic ketone (**14**). The 1,2-alkyl shift is computed to be relatively facile ( $\Delta G^\ddagger = 11.8$  kcal/mol) and thermodynamically much more favorable ( $\Delta G = -12.7$  kcal/mol relative to **1**) than deprotonation leading to **3** ( $\Delta G = -1.6$  kcal/mol). However, we find no experimental evidence for the formation of **14**. Therefore, deprotonation of  $[H^+]7$  must be rapid, with  $\Delta G^\ddagger \ll 11.8$  kcal/mol, to explain the observed formation of **3**.

Rapid deprotonation of  $[H^+]7$  is likely to require a strong base to be present in the immediate vicinity of the cation after it has formed. We propose that this base is  $OH^-$ , which is derived from a water molecule that is the source of the proton that activates **2-E,E**. Thus, the mechanism of the Nazarov cyclization is proposed to consist of the following steps: (i) an adventitious water molecule donates a proton to the carbonyl oxygen of **2-E,E** (or to cyclobutenone **1** which undergoes ring-opening); (ii) Nazarov cyclization furnishes the ion pair of  $[H^+]7$  and  $OH^-$ ; and (iii)  $OH^-$  then rapidly deprotonates  $[H^+]7$  to give **3** (either directly, or by initial *O*-deprotonation followed by tautomerization) and regenerate the catalyst.

C-Protonation of cyclobutenamides **1** is a plausible first step in a Ficini-type rearrangement leading to amido-dienes **16** (Figure S5). The calculated barrier for ring-opening of the isomerized cyclobutenamide **15-anti** (28.8 kcal/mol), leading to amido-diene **16-cis**, is 4 kcal/mol lower than the barrier for ring-opening of cyclobutenamide **1** to *cis,trans*-cyclooctadienone **2-E,E** (**TS7**, 32.3 kcal/mol, Figure 2). Experimentally, amidodienes **16** are obtained when 0.4 CSA is present in the reaction mixture, but not under thermal conditions. The isomerization of **1** to **15** is likely to be rate-limiting under thermal conditions (similar to the case proposed for the 4,5-fused system), explaining why Ficini's amido-dienes are not observed under thermal conditions.

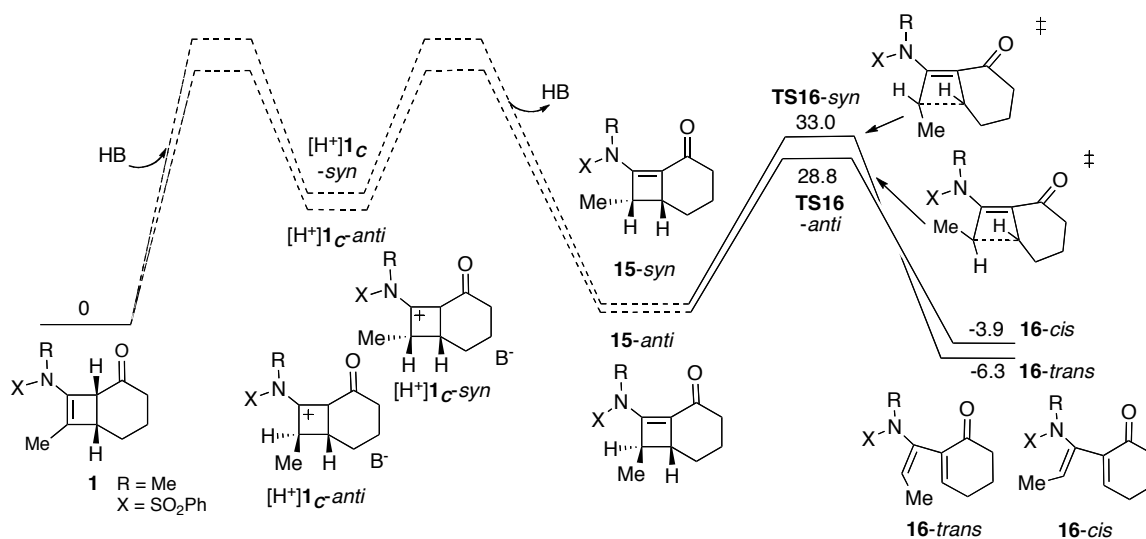

**Figure S5.** Rearrangement of 4,6-fused cyclobutenamide **1** to Ficini-type amido-dienes **16-cis** and **16-trans**.

#### 4,5-Fused Cyclobutenamides

We propose that the rearrangements of 4,5-fused cyclobutenamides **8** to amidodienes **12** are acid-catalyzed and that the mechanism of acid catalysis is analogous to that proposed for the 4,6-fused systems in Figure S5. That is, the acid protonates the enamide  $\beta$ -carbon of **8** and the conjugate base then effects deprotonation  $\alpha$  to the carbonyl group to give **11**. Under the conditions used to effect thermal rearrangement (195 °C, xylenes), the conversion of **8** to **11** is rate-limiting because the concentration of acid catalyst is minute. Deliberate addition of an acid catalyst (0.4 equiv CSA) accelerates the rearrangement to furnish an 85–92% yield of amido-dienes **12a–c** in only 6 hours (see ref. 19 of the paper).

## Theoretical Calculations

Geometries were optimized at the B3LYP/6-31G(d) level of theory<sup>1</sup> in the gas phase. Vibrational frequency calculations were used to determine the nature of each stationary point (local minimum or first-order saddle point) and to compute unscaled zero-point energy and thermochemical corrections. Single-point energies were computed at the M06-2X/6-311+G(d,p) level of theory<sup>2</sup> in the gas phase on the B3LYP geometries. Solvation energies were computed from single-point calculations in implicit toluene using the SMD method.<sup>3</sup> The M06-2X potential energies were used in conjunction with the B3LYP thermochemical corrections and solvation energies to obtain free energies in solution. A standard state of 298.15 K and 1 mol/L was used.

Underneath the Cartesian coordinates for the optimized geometries are listed the following energies:

B3LYP/6-31G(d) electronic energy (E)

B3LYP/6-31G(d) enthalpy at 298.15 K (H)

B3LYP/6-31G(d) Gibbs free energy at 298.15 K and 1 mol/L (G)

M06-2X/6-311+G(d,p) potential energy ( $E_{\text{M06-2X}}$ )

Sum of B3LYP/6-31G(d) potential energy and free energy of solvation in toluene at 298.15 K and 1 mol/L ( $E_{\text{solv}}$ )

All energies are given in Hartree.

---

<sup>1</sup> (a) Lee, C.; Yang, W.; Parr, R. G. *Phys. Rev. B*, **1988**, *37*, 785–789. (b) Becke, A. D. *J. Chem. Phys.* **1993**, *98*, 1372–1377. (c) Becke, A. D. *J. Chem. Phys.* **1993**, *98*, 5648–5652. (d) Stephens, P. J.; Devlin, F. J.; Chabalowski, C. F.; Frisch, M. J. *J. Phys. Chem.* **1994**, *98*, 11623–11627.

<sup>2</sup> (a) Y. Zhao, D. G. Truhlar, *Theor. Chem. Acc.* **2008**, *120*, 215–241. (b) Y. Zhao, D. G. Truhlar, *Acc. Chem. Res.* **2008**, *41*, 157–167.

<sup>3</sup> Marenich, A. V.; Cramer, C. J.; Truhlar, D. G. *J. Phys. Chem. B* **2009**, *113*, 6378–6396.

## Computed Geometries and Energies

In each species below, the group NRX is modeled as NMe(SO<sub>2</sub>Ph).

### Cyclobutenamide 1

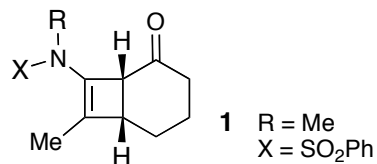

|   |           |           |           |
|---|-----------|-----------|-----------|
| C | -2.248864 | 1.106298  | -0.388227 |
| C | -2.541819 | 1.997627  | -1.543934 |
| H | -2.516971 | 1.444295  | -2.492712 |
| H | -3.549924 | 2.423623  | -1.449251 |
| H | -1.810798 | 2.804791  | -1.618262 |
| C | -1.259688 | 0.975558  | 0.520682  |
| C | -1.926709 | -0.176565 | 1.286796  |
| H | -2.204248 | 0.063061  | 2.320867  |
| C | -3.085840 | -0.007514 | 0.233994  |
| H | -4.003193 | 0.381881  | 0.697975  |
| C | -1.118771 | -1.467363 | 1.298386  |
| O | -0.203620 | -1.607300 | 2.093408  |
| C | -1.477432 | -2.565039 | 0.305654  |
| H | -0.564894 | -3.129447 | 0.088789  |
| H | -2.149870 | -3.253344 | 0.843293  |
| C | -2.182432 | -2.068737 | -0.965179 |
| H | -2.464688 | -2.927426 | -1.585752 |
| H | -1.486777 | -1.464874 | -1.561035 |
| C | -3.424744 | -1.240999 | -0.614115 |
| H | -4.131361 | -1.874585 | -0.058951 |
| H | -3.945454 | -0.924506 | -1.527372 |
| N | -0.059695 | 1.650870  | 0.809358  |
| C | 0.316712  | 1.738478  | 2.232349  |
| S | 1.191685  | 1.709778  | -0.349792 |
| H | 0.451524  | 0.746317  | 2.676845  |
| H | 1.229725  | 2.327074  | 2.314370  |
| H | -0.482001 | 2.268456  | 2.760279  |
| O | 2.199775  | 2.614304  | 0.206865  |
| O | 0.551171  | 1.966807  | -1.640451 |
| C | 1.920726  | 0.069123  | -0.440809 |
| C | 1.549546  | -0.782213 | -1.483689 |
| C | 2.105572  | -2.061045 | -1.543913 |
| C | 3.015831  | -2.476124 | -0.569622 |
| C | 3.385264  | -1.610627 | 0.463164  |
| C | 2.842535  | -0.328728 | 0.531007  |
| H | 3.140697  | 0.360364  | 1.313675  |
| H | 0.859220  | -0.429464 | -2.241828 |
| H | 1.834281  | -2.727980 | -2.357557 |
| H | 3.446078  | -3.472514 | -0.619771 |
| H | 4.101598  | -1.931518 | 1.213732  |

0 imaginary frequencies

E = -1299.646787

H = -1299.299085

G = -1299.366531

E<sub>M06-2X</sub> = -1299.515289

E<sub>solv</sub> = -1299.667226

## TS2-E,E

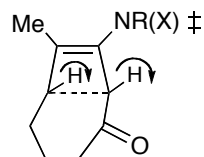

|   |           |           |           |
|---|-----------|-----------|-----------|
| C | -0.833804 | -0.404502 | 0.280869  |
| C | -1.600425 | -0.971050 | -0.707469 |
| C | -1.836101 | -2.419480 | -1.024916 |
| H | -1.363157 | -2.703071 | -1.971415 |
| H | -1.409057 | -3.054159 | -0.244338 |
| H | -2.906489 | -2.642585 | -1.106489 |
| C | -2.251840 | 0.173156  | -1.308348 |
| H | -1.635156 | 0.909988  | -1.812328 |
| C | -3.729691 | 0.179485  | -1.612358 |
| H | -4.048401 | -0.851799 | -1.806152 |
| H | -3.951302 | 0.761766  | -2.513763 |
| C | -4.554267 | 0.730657  | -0.412501 |
| H | -4.672158 | 1.815894  | -0.508650 |
| H | -5.561915 | 0.299699  | -0.429784 |
| C | -3.865073 | 0.444255  | 0.939191  |
| H | -4.533783 | 0.720633  | 1.759301  |
| H | -3.621172 | -0.619844 | 1.029397  |
| C | -2.632022 | 1.341817  | 1.052224  |
| O | -2.758556 | 2.475154  | 1.507654  |
| C | -1.313180 | 0.934214  | 0.508784  |
| H | -0.587454 | 1.738283  | 0.671772  |
| N | 0.242340  | -0.988489 | 0.995294  |
| C | 0.477296  | -0.568851 | 2.387548  |
| H | 0.998169  | 0.394632  | 2.463226  |
| H | 1.061144  | -1.337519 | 2.894163  |
| H | -0.495913 | -0.478646 | 2.874371  |
| S | 1.641919  | -1.469171 | 0.128057  |
| O | 2.459423  | -2.224244 | 1.079214  |
| O | 1.184608  | -2.050712 | -1.132944 |
| C | 2.512192  | 0.055426  | -0.258451 |
| C | 3.497451  | 0.521361  | 0.615444  |
| C | 4.139487  | 1.727005  | 0.329693  |
| C | 3.795763  | 2.450593  | -0.814053 |
| C | 2.814550  | 1.968594  | -1.684611 |
| C | 2.166102  | 0.764582  | -1.412373 |
| H | 1.419857  | 0.362766  | -2.089262 |
| H | 2.559624  | 2.526571  | -2.581065 |
| H | 4.298788  | 3.388412  | -1.032542 |
| H | 4.912182  | 2.096431  | 0.997774  |
| H | 3.766673  | -0.066441 | 1.486383  |

1 imaginary frequency

E = -1299.598259

H = -1299.252430

G = -1299.319274

E<sub>M06-2X</sub> = -1299.461248

E<sub>solv</sub> = -1299.620044



## TS2-Z,Z

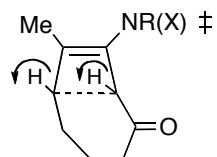

|   |           |           |           |
|---|-----------|-----------|-----------|
| C | -2.086213 | 1.601113  | -0.130842 |
| C | -1.912912 | 3.071155  | -0.381799 |
| H | -2.879232 | 3.584617  | -0.283676 |
| H | -1.535039 | 3.265519  | -1.391678 |
| H | -1.206222 | 3.517930  | 0.325026  |
| C | -1.319994 | 0.733884  | 0.631785  |
| C | -3.237297 | 0.841159  | -0.504401 |
| H | -4.203889 | 1.367106  | -0.474892 |
| C | -3.296672 | -0.387906 | -1.395059 |
| H | -2.281551 | -0.687144 | -1.678870 |
| H | -3.811183 | -0.094847 | -2.323716 |
| C | -4.065938 | -1.590336 | -0.788339 |
| H | -4.988607 | -1.214945 | -0.328569 |
| H | -4.380700 | -2.257426 | -1.598754 |
| C | -3.249796 | -2.424003 | 0.249951  |
| H | -3.884393 | -2.658809 | 1.115646  |
| H | -2.922426 | -3.374612 | -0.180725 |
| C | -1.985137 | -1.722331 | 0.756479  |
| O | -0.885233 | -2.274261 | 0.714804  |
| C | -2.215020 | -0.314955 | 1.064729  |
| H | -3.113539 | -0.051620 | 1.614816  |
| N | 0.029690  | 0.797327  | 0.971816  |
| C | 0.505845  | 0.263944  | 2.256615  |
| H | 1.454976  | 0.739718  | 2.513170  |
| H | -0.226919 | 0.521496  | 3.025836  |
| H | 0.623284  | -0.822871 | 2.213988  |
| S | 1.217545  | 1.350273  | -0.134243 |
| O | 0.544389  | 1.508929  | -1.424247 |
| O | 1.917860  | 2.480759  | 0.484678  |
| C | 2.394805  | -0.006104 | -0.233641 |
| C | 3.752367  | 0.306326  | -0.127079 |
| C | 4.693310  | -0.711426 | -0.284717 |
| C | 4.274603  | -2.018958 | -0.539262 |
| C | 2.912773  | -2.315999 | -0.634291 |
| C | 1.959560  | -1.308594 | -0.487132 |
| H | 0.901724  | -1.545345 | -0.521907 |
| H | 2.586371  | -3.335636 | -0.816956 |
| H | 5.010556  | -2.809749 | -0.656899 |
| H | 5.752038  | -0.481438 | -0.205460 |
| H | 4.054366  | 1.327173  | 0.078927  |

1 imaginary frequency

E = -1299.586311

H = -1299.241324

G = -1299.308807

E<sub>M06-2X</sub> = -1299.445898

E<sub>solv</sub> = -1299.606365

## 2-E,E

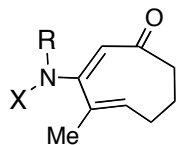

|   |           |           |           |
|---|-----------|-----------|-----------|
| C | -0.779597 | -0.492615 | 0.580140  |
| C | -1.605818 | -0.888807 | -0.576488 |
| C | -1.994877 | -2.341887 | -0.719440 |
| H | -1.106294 | -2.944984 | -0.924092 |
| H | -2.454296 | -2.731226 | 0.198672  |
| H | -2.694693 | -2.488656 | -1.545885 |
| C | -2.153958 | 0.138222  | -1.264899 |
| H | -1.689929 | 1.116707  | -1.143709 |
| C | -3.553306 | 0.195608  | -1.781076 |
| H | -3.980344 | -0.802270 | -1.921277 |
| H | -3.654420 | 0.740981  | -2.726889 |
| C | -4.327966 | 0.950831  | -0.650841 |
| H | -4.171203 | 2.031325  | -0.754217 |
| H | -5.405013 | 0.775829  | -0.762751 |
| C | -3.873660 | 0.534005  | 0.773925  |
| H | -4.634868 | 0.875572  | 1.484881  |
| H | -3.809897 | -0.557043 | 0.848462  |
| C | -2.571077 | 1.210619  | 1.259069  |
| O | -2.634500 | 2.373315  | 1.646354  |
| C | -1.259977 | 0.507085  | 1.376860  |
| H | -0.647838 | 0.911152  | 2.179064  |
| N | 0.368332  | -1.239605 | 0.947642  |
| C | 0.831002  | -1.192024 | 2.342955  |
| H | 1.315756  | -0.240457 | 2.600806  |
| H | 1.531337  | -2.010175 | 2.505071  |
| H | -0.042263 | -1.327879 | 2.984526  |
| S | 1.631715  | -1.444511 | -0.213755 |
| O | 2.593350  | -2.352178 | 0.413103  |
| O | 0.998148  | -1.760718 | -1.491728 |
| C | 2.398648  | 0.171781  | -0.360113 |
| C | 3.513376  | 0.472470  | 0.426262  |
| C | 4.084676  | 1.741663  | 0.327909  |
| C | 3.543229  | 2.688491  | -0.544151 |
| C | 2.431935  | 2.370892  | -1.329452 |
| C | 1.850828  | 1.106459  | -1.243137 |
| H | 1.000173  | 0.836207  | -1.859718 |
| H | 2.019777  | 3.106359  | -2.014125 |
| H | 3.992069  | 3.675110  | -0.617260 |
| H | 4.956377  | 1.986938  | 0.927708  |
| H | 3.933062  | -0.284195 | 1.080349  |

0 imaginary frequencies

E = -1299.633850

H = -1299.286070

G = -1299.352563

E<sub>H06-2X</sub> = -1299.500766

E<sub>solv</sub> = -1299.654873

## 2-Z,Z

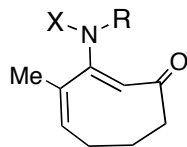

|   |           |           |           |
|---|-----------|-----------|-----------|
| C | 1.558441  | -0.474601 | 0.686573  |
| C | 2.545281  | -0.914872 | -0.319598 |
| C | 2.880179  | -2.382192 | -0.464850 |
| H | 3.118216  | -2.829972 | 0.508024  |
| H | 3.743232  | -2.518020 | -1.124194 |
| H | 2.041368  | -2.939635 | -0.890820 |
| N | 0.357714  | -1.177532 | 0.918341  |
| C | -0.189336 | -1.248256 | 2.292029  |
| H | -0.741353 | -2.183449 | 2.395788  |
| H | -0.816054 | -0.386792 | 2.529541  |
| H | 0.663597  | -1.255125 | 2.973371  |
| S | -0.709413 | -1.667977 | -0.330632 |
| O | 0.052765  | -1.662424 | -1.579012 |
| O | -1.375261 | -2.875524 | 0.160488  |
| C | -1.953023 | -0.376659 | -0.450759 |
| C | -1.821399 | 0.595613  | -1.444585 |
| C | -2.785837 | 1.598530  | -1.540587 |
| C | -3.863726 | 1.621990  | -0.653097 |
| C | -3.992145 | 0.633383  | 0.325067  |
| C | -3.038419 | -0.378470 | 0.428673  |
| H | -3.142724 | -1.168937 | 1.163650  |
| H | -4.839638 | 0.644312  | 1.004205  |
| H | -4.611390 | 2.406411  | -0.730219 |
| H | -2.698454 | 2.356736  | -2.313530 |
| H | -0.991804 | 0.542933  | -2.141018 |
| C | 1.880458  | 0.649147  | 1.392106  |
| H | 2.916962  | 0.954449  | 1.299332  |
| C | 3.167311  | 0.033305  | -1.057542 |
| H | 3.950661  | -0.337277 | -1.721729 |
| C | 0.941627  | 1.779975  | 1.502129  |
| O | -0.168441 | 1.824805  | 2.004231  |
| C | 3.010637  | 1.546215  | -1.204060 |
| H | 3.869522  | 2.022634  | -0.702182 |
| H | 3.196371  | 1.734823  | -2.271209 |
| C | 1.725844  | 2.357926  | -0.860201 |
| H | 0.839531  | 1.796872  | -1.178792 |
| H | 1.761477  | 3.246046  | -1.504309 |
| C | 1.488964  | 2.886248  | 0.587952  |
| H | 2.428164  | 3.285387  | 0.995919  |
| H | 0.757281  | 3.700419  | 0.568738  |

0 imaginary frequencies

E = -1299.616378

H = -1299.268904

G = -1299.336116

E<sub>H06-2X</sub> = -1299.482143

E<sub>solv</sub> = -1299.636447

# TS7

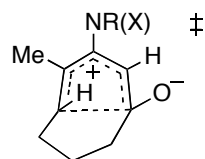

|   |           |           |           |
|---|-----------|-----------|-----------|
| C | 2.623816  | -0.001854 | -0.790933 |
| C | 1.784514  | 1.076986  | -0.299566 |
| C | 0.792510  | 0.571894  | 0.567117  |
| C | 1.176743  | -0.655924 | 1.105246  |
| H | 0.584244  | -1.237309 | 1.803887  |
| C | 2.359544  | -1.267318 | 0.458597  |
| O | 1.838075  | -2.374053 | 0.005042  |
| C | 3.789780  | -1.269507 | 1.038235  |
| H | 3.921579  | -0.443260 | 1.750664  |
| H | 3.963773  | -2.215764 | 1.560989  |
| C | 4.714460  | -1.076975 | -0.176563 |
| H | 4.655156  | -1.972190 | -0.807810 |
| H | 5.764889  | -0.932462 | 0.098947  |
| C | 4.134702  | 0.138972  | -0.945152 |
| H | 4.462153  | 0.154270  | -1.990573 |
| H | 4.489717  | 1.065977  | -0.476973 |
| C | 1.993080  | 2.529600  | -0.567708 |
| H | 1.573350  | 2.777576  | -1.551255 |
| H | 1.491753  | 3.158658  | 0.172461  |
| H | 3.061088  | 2.769346  | -0.601412 |
| N | -0.367017 | 1.308870  | 0.920757  |
| C | -0.896835 | 1.163416  | 2.284622  |
| H | -1.659753 | 1.926323  | 2.443481  |
| H | -1.330604 | 0.171914  | 2.474566  |
| H | -0.073846 | 1.333337  | 2.983290  |
| S | -1.565220 | 1.421495  | -0.314535 |
| O | -2.508389 | 2.447751  | 0.132480  |
| O | -0.826795 | 1.549075  | -1.572178 |
| C | -2.422277 | -0.160055 | -0.309649 |
| C | -3.764085 | -0.186329 | 0.078285  |
| C | -4.444859 | -1.404273 | 0.079905  |
| C | -3.783154 | -2.576562 | -0.290346 |
| C | -2.438350 | -2.537469 | -0.667609 |
| C | -1.746415 | -1.326841 | -0.687820 |
| H | -0.700258 | -1.313310 | -0.974313 |
| H | -1.919397 | -3.448982 | -0.948315 |
| H | -4.315334 | -3.523810 | -0.283736 |
| H | -5.491024 | -1.434612 | 0.370786  |
| H | -4.258123 | 0.737013  | 0.360043  |
| H | 2.131111  | -0.567469 | -1.580194 |

1 imaginary frequency

E = -1299.578783

H = -1299.234526

G = -1299.299739

E<sub>M06-2X</sub> = -1299.437142

E<sub>solv</sub> = -1299.600443

7

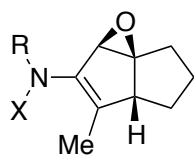

|   |          |          |          |
|---|----------|----------|----------|
| C | -3.14348 | 1.29461  | 0.01040  |
| C | -2.81503 | -0.02379 | 0.33649  |
| C | -3.77882 | -1.03234 | 0.35988  |
| C | -5.09856 | -0.71334 | 0.03373  |
| C | -5.43828 | 0.59707  | -0.30614 |
| C | -4.46355 | 1.59955  | -0.31538 |
| S | -1.12138 | -0.41492 | 0.78998  |
| O | -1.10134 | -1.79455 | 1.30328  |
| N | -0.32260 | -0.32962 | -0.74018 |
| C | -0.69715 | -1.41953 | -1.66043 |
| C | 1.08813  | -0.11668 | -0.62740 |
| C | 1.69603  | 1.08588  | -0.69510 |
| C | 3.20168  | 0.92976  | -0.56498 |
| C | 3.40400  | -0.58923 | -0.42377 |
| C | 2.08116  | -1.22115 | -0.42893 |
| H | 1.83436  | -2.12747 | 0.11901  |
| C | 4.55785  | -0.86227 | 0.51032  |
| C | 4.39444  | 0.29022  | 1.52515  |
| C | 3.90479  | 1.51586  | 0.69944  |
| C | 1.04391  | 2.40882  | -0.93248 |
| H | 1.10422  | 3.04048  | -0.03646 |
| H | -0.01142 | 2.28500  | -1.18915 |
| H | 1.54555  | 2.95274  | -1.74365 |
| O | 3.03000  | -1.40222 | -1.53180 |
| O | -0.58322 | 0.68406  | 1.59492  |
| H | 3.68314  | 1.30916  | -1.47633 |
| H | 3.24055  | 2.15506  | 1.28941  |
| H | 4.75691  | 2.13307  | 0.39463  |
| H | 5.31625  | 0.50493  | 2.07497  |
| H | 3.63193  | 0.01296  | 2.26214  |
| H | 5.50855  | -0.77878 | -0.03417 |
| H | 4.51933  | -1.85547 | 0.96768  |
| H | -1.78354 | -1.43879 | -1.77902 |
| H | -0.24496 | -1.19762 | -2.62980 |
| H | -0.35642 | -2.40449 | -1.31899 |
| H | -2.37891 | 2.06394  | 0.02650  |
| H | -4.73371 | 2.62019  | -0.57074 |
| H | -6.46634 | 0.84126  | -0.55910 |
| H | -5.85931 | -1.48849 | 0.04950  |
| H | -3.49211 | -2.04056 | 0.63909  |

0 Imaginary Frequencies

E = -1299.627424

H = -1299.279931

G = -1299.347356

E<sub>M06-2X</sub> = -1299.495628E<sub>solv</sub> = -1299.648271

## 3

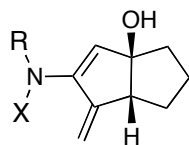

|   |           |           |           |
|---|-----------|-----------|-----------|
| C | 2.265178  | -1.290516 | -1.033362 |
| C | 2.274810  | -0.219750 | -0.138817 |
| C | 2.769463  | -0.354693 | 1.160271  |
| C | 3.246788  | -1.597299 | 1.573607  |
| C | 3.232722  | -2.682823 | 0.692901  |
| C | 2.746477  | -2.530165 | -0.607111 |
| S | 1.701968  | 1.389521  | -0.691856 |
| O | 1.374995  | 1.286221  | -2.121672 |
| N | 0.310494  | 1.593398  | 0.282166  |
| C | -0.102283 | 2.999105  | 0.478736  |
| C | -0.737804 | 0.635507  | 0.164872  |
| C | -1.465335 | 0.182858  | 1.368528  |
| C | -2.535815 | -0.792973 | 0.902088  |
| C | -2.248070 | -1.014966 | -0.631484 |
| C | -1.176193 | 0.001206  | -0.941285 |
| C | -3.581969 | -0.739290 | -1.350384 |
| C | -4.310238 | 0.256676  | -0.437839 |
| C | -3.996370 | -0.264391 | 0.978351  |
| C | -1.199363 | 0.536377  | 2.632106  |
| O | -1.827647 | -2.338596 | -0.975858 |
| O | 2.633439  | 2.426111  | -0.237579 |
| H | -0.801573 | 0.158863  | -1.945880 |
| H | -1.769094 | 0.133410  | 3.464917  |
| H | -0.395701 | 1.225811  | 2.872829  |
| H | -2.439591 | -1.741824 | 1.439582  |
| H | -4.126145 | 0.493541  | 1.757532  |
| H | -4.668214 | -1.097935 | 1.217045  |
| H | -5.384770 | 0.315979  | -0.640727 |
| H | -3.897046 | 1.264453  | -0.572845 |
| H | -4.132046 | -1.687276 | -1.401766 |
| H | -3.438696 | -0.381608 | -2.375438 |
| H | -0.854052 | 3.012040  | 1.270075  |
| H | 0.763240  | 3.585354  | 0.787572  |
| H | -0.535152 | 3.429974  | -0.433136 |
| H | 1.894931  | -1.142892 | -2.041922 |
| H | 2.746732  | -3.372246 | -1.293327 |
| H | 3.607434  | -3.648738 | 1.020143  |
| H | 3.633115  | -1.717728 | 2.581537  |
| H | 2.781838  | 0.499400  | 1.828966  |
| H | -0.928451 | -2.453774 | -0.626824 |

0 imaginary frequencies

E = -1299.641321

H = -1299.293681

G = -1299.360053

E<sub>M06-2X</sub> = -1299.519476

E<sub>solv</sub> = -1299.661173

[H<sup>+</sup>]1

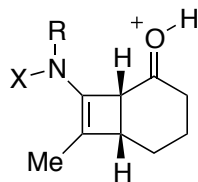

|   |          |          |          |
|---|----------|----------|----------|
| C | 1.11746  | -1.17804 | 1.42378  |
| C | 0.17748  | -2.21323 | 1.92806  |
| H | 0.11672  | -3.05896 | 1.23089  |
| H | 0.52948  | -2.61739 | 2.88548  |
| H | -0.82764 | -1.80657 | 2.06490  |
| C | 0.99337  | 0.12634  | 1.11452  |
| C | 2.55511  | 0.29480  | 0.81020  |
| H | 3.05931  | 0.99284  | 1.48507  |
| C | 2.61650  | -1.23406 | 1.15073  |
| H | 3.20241  | -1.40611 | 2.06155  |
| C | 2.69869  | 0.67077  | -0.58240 |
| O | 2.70875  | 1.94987  | -0.80891 |
| C | 2.85925  | -0.29841 | -1.69860 |
| H | 2.30629  | 0.05499  | -2.57702 |
| H | 3.93319  | -0.24111 | -1.95464 |
| C | 2.49495  | -1.74527 | -1.33366 |
| H | 2.85643  | -2.40498 | -2.12741 |
| H | 1.40415  | -1.83623 | -1.31050 |
| C | 3.09755  | -2.15053 | 0.01842  |
| H | 4.19372  | -2.11555 | -0.03365 |
| H | 2.83218  | -3.18770 | 0.25166  |
| N | -0.02549 | 1.06103  | 1.08661  |
| C | 0.10903  | 2.25061  | 1.95582  |
| S | -0.83715 | 1.27514  | -0.44379 |
| H | 0.19467  | 1.90318  | 2.98808  |
| H | 0.98466  | 2.85546  | 1.69357  |
| H | -0.78206 | 2.86881  | 1.85612  |
| O | 0.10234  | 0.79328  | -1.47689 |
| O | -1.32144 | 2.65186  | -0.44871 |
| C | -2.21760 | 0.14732  | -0.37984 |
| C | -3.31710 | 0.48132  | 0.41821  |
| C | -4.40401 | -0.38906 | 0.45468  |
| C | -4.38835 | -1.56475 | -0.30253 |
| C | -3.28861 | -1.87574 | -1.10471 |
| C | -2.18914 | -1.01754 | -1.14975 |
| H | -1.33755 | -1.22863 | -1.78638 |
| H | -3.33060 | 1.40844  | 0.98157  |
| H | -5.26772 | -0.14407 | 1.06489  |
| H | -5.24239 | -2.23480 | -0.27446 |
| H | -3.28912 | -2.78049 | -1.70488 |
| H | 2.63197  | 2.16218  | -1.76204 |

0 Imaginary Frequencies

E = -1300.00529

H = -1299.645730

G = -1299.714696

E<sub>M06-2X</sub> = -1299.865507

E<sub>solv</sub> = -1300.063997

**[H<sup>+</sup>]1<sub>c-anti</sub>**

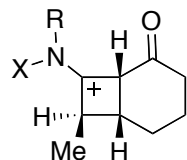

|   |           |           |           |
|---|-----------|-----------|-----------|
| C | 3.792149  | 0.296226  | 0.647047  |
| C | 2.728134  | 0.109096  | -0.243960 |
| C | 2.729957  | -0.891041 | -1.225059 |
| C | 3.832052  | -1.739330 | -1.295386 |
| C | 4.902647  | -1.575022 | -0.409860 |
| C | 4.886695  | -0.560961 | 0.552252  |
| S | 1.363680  | 1.234223  | -0.179061 |
| O | 0.749142  | 1.373644  | -1.490509 |
| N | 0.072126  | 0.241094  | 0.779511  |
| C | 0.590284  | -0.630112 | 1.854681  |
| C | -1.181735 | 0.390139  | 0.509682  |
| C | -2.385864 | -0.322911 | 1.049049  |
| C | -3.280875 | 0.756336  | 0.354343  |
| C | -4.474304 | 0.261922  | -0.466550 |
| C | -4.221231 | -1.077720 | -1.171211 |
| C | -3.766800 | -2.159147 | -0.166232 |
| C | -2.457552 | -1.779072 | 0.476560  |
| C | -2.007962 | 1.306107  | -0.383296 |
| C | -1.792000 | 2.822662  | -0.331331 |
| O | -1.484569 | -2.494044 | 0.559066  |
| O | 1.647942  | 2.352451  | 0.705624  |
| H | -0.901796 | 3.130880  | -0.880253 |
| H | -2.660239 | 3.306027  | -0.791503 |
| H | -1.715366 | 3.180702  | 0.700392  |
| H | -2.459237 | -0.411620 | 2.140302  |
| H | -3.610971 | 1.498472  | 1.087816  |
| H | -3.642530 | -3.140631 | -0.631650 |
| H | -4.523684 | -2.255573 | 0.627165  |
| H | -5.136394 | -1.415219 | -1.667424 |
| H | -3.467230 | -0.971685 | -1.962777 |
| H | -5.336125 | 0.150057  | 0.203937  |
| H | -4.753243 | 1.032139  | -1.196158 |
| H | 1.079586  | -1.501529 | 1.420156  |
| H | 1.298546  | -0.050314 | 2.450978  |
| H | -0.236271 | -0.962540 | 2.479700  |
| H | 3.769354  | 1.101588  | 1.373346  |
| H | 1.903700  | -0.988282 | -1.921031 |
| H | 3.860628  | -2.520472 | -2.048210 |
| H | 5.760236  | -2.237560 | -0.477014 |
| H | 5.728980  | -0.431139 | 1.224197  |
| H | -1.943418 | 0.952038  | -1.421400 |

0 imaginary frequencies

E = -1300.031192

H = -1299.670790

G = -1299.738215

E<sub>M06-2X</sub> = -1299.880936

E<sub>solv</sub> = -1300.090162



**[H<sup>+</sup>]1<sub>c-syn</sub>**

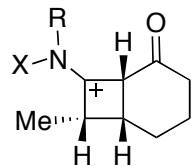

|   |           |           |           |
|---|-----------|-----------|-----------|
| C | 3.760991  | 0.152249  | -0.708020 |
| C | 2.717161  | -0.062417 | 0.201329  |
| C | 2.564583  | 0.700673  | 1.365933  |
| C | 3.481502  | 1.719308  | 1.610838  |
| C | 4.525502  | 1.956473  | 0.710510  |
| C | 4.668274  | 1.175737  | -0.439740 |
| S | 1.590929  | -1.393977 | -0.107340 |
| O | 1.050316  | -1.927590 | 1.132139  |
| N | 0.123124  | -0.516446 | -0.895743 |
| C | 0.424484  | 0.071874  | -2.220698 |
| C | -1.071003 | -0.586744 | -0.406836 |
| C | -2.383237 | -0.170240 | -1.008480 |
| C | -3.093995 | -1.069882 | 0.062545  |
| C | -4.353511 | -0.507888 | 0.734424  |
| C | -4.393665 | 1.022638  | 0.873445  |
| C | -4.053644 | 1.723553  | -0.460152 |
| C | -2.664927 | 1.360653  | -0.919853 |
| C | -1.716531 | -1.206511 | 0.821481  |
| C | -1.524950 | -0.424203 | 2.133182  |
| O | -1.795871 | 2.152082  | -1.213492 |
| O | 2.053697  | -2.220117 | -1.209409 |
| H | -2.276406 | -0.751585 | 2.857576  |
| H | -0.539046 | -0.635604 | 2.551044  |
| H | -1.626904 | 0.656621  | 2.000008  |
| H | -2.518330 | -0.449025 | -2.061966 |
| H | -3.330737 | -2.041883 | -0.379596 |
| H | -4.114507 | 2.812404  | -0.384736 |
| H | -4.765568 | 1.396303  | -1.233306 |
| H | -5.394775 | 1.332403  | 1.189785  |
| H | -3.706836 | 1.371717  | 1.652406  |
| H | -5.213860 | -0.819063 | 0.128378  |
| H | -4.490536 | -0.983860 | 1.712711  |
| H | 1.350677  | 0.643457  | -2.141458 |
| H | 0.550876  | -0.733321 | -2.947750 |
| H | -0.375882 | 0.755361  | -2.494907 |
| H | 3.870078  | -0.479572 | -1.582902 |
| H | 1.765389  | 0.491580  | 2.068426  |
| H | 3.387568  | 2.321391  | 2.508878  |
| H | 5.238022  | 2.750369  | 0.912758  |
| H | 5.490474  | 1.355856  | -1.124788 |
| H | -1.403769 | -2.241457 | 0.983731  |

0 imaginary frequencies

E = -1300.028986

H = -1299.668242

G = -1299.735852

E<sub>M06-2X</sub> = -1299.878270

E<sub>solv</sub> = -1300.087907

# [H<sup>+</sup>]TS2

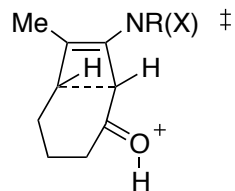

|   |          |          |          |
|---|----------|----------|----------|
| C | 1.06445  | 0.64504  | -0.54942 |
| C | 2.13736  | 1.48772  | -0.55806 |
| C | 2.31586  | 2.91261  | -0.10959 |
| H | 1.68370  | 3.15577  | 0.74697  |
| H | 3.35300  | 3.10563  | 0.17915  |
| H | 2.08303  | 3.61746  | -0.91790 |
| C | 3.21448  | 0.63959  | -1.10708 |
| H | 3.21453  | 0.43132  | -2.17597 |
| C | 4.53926  | 0.52510  | -0.39091 |
| H | 4.69304  | 1.45447  | 0.16875  |
| H | 5.35932  | 0.43045  | -1.10938 |
| C | 4.59649  | -0.66034 | 0.62052  |
| H | 5.03162  | -1.54069 | 0.13758  |
| H | 5.24327  | -0.40896 | 1.46550  |
| C | 3.17787  | -1.01665 | 1.13484  |
| H | 3.23340  | -1.83502 | 1.85788  |
| H | 2.70048  | -0.15680 | 1.60884  |
| C | 2.39025  | -1.47392 | -0.04726 |
| O | 2.63806  | -2.73110 | -0.35853 |
| C | 1.59285  | -0.68436 | -0.89150 |
| H | 1.13013  | -1.21433 | -1.72924 |
| N | -0.30174 | 0.84881  | -0.37600 |
| C | -0.82827 | 2.22589  | -0.37329 |
| H | -1.90021 | 2.18927  | -0.57610 |
| H | -0.34817 | 2.77381  | -1.18568 |
| H | -0.66222 | 2.74047  | 0.57778  |
| S | -1.11554 | -0.23793 | 0.74925  |
| O | -0.51298 | -1.55291 | 0.49432  |
| O | -1.05615 | 0.36384  | 2.08181  |
| C | -2.79759 | -0.21870 | 0.16210  |
| C | -3.10939 | -0.86368 | -1.03932 |
| C | -4.43591 | -0.87652 | -1.46312 |
| C | -5.42581 | -0.26294 | -0.68840 |
| C | -5.09834 | 0.36596  | 0.51455  |
| C | -3.77385 | 0.39347  | 0.95252  |
| H | -3.49822 | 0.86609  | 1.88889  |
| H | -5.87224 | 0.83172  | 1.11656  |
| H | -6.45874 | -0.28180 | -1.02288 |
| H | -4.69974 | -1.37222 | -2.39217 |
| H | -2.33509 | -1.35188 | -1.62130 |
| H | 2.10028  | -3.03767 | -1.11355 |

1 Imaginary Frequency

E = -1299.975498

H = -1299.616606

G = -1299.685591

E<sub>M06-2X</sub> = -1299.830204

E<sub>solv</sub> = -1300.034433

**[H<sup>+</sup>]2-E,E**

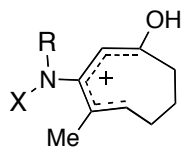

|   |           |           |           |
|---|-----------|-----------|-----------|
| C | -1.786793 | 1.086885  | 0.837609  |
| C | -3.111017 | 0.902298  | 1.091302  |
| C | -4.238351 | 1.676207  | 0.515330  |
| C | -4.669476 | 0.774194  | -0.697216 |
| C | -3.453424 | 0.172790  | -1.462278 |
| C | -2.808745 | -1.048623 | -0.829844 |
| C | -1.663875 | -1.193043 | -0.044408 |
| C | -1.008133 | -0.146068 | 0.653822  |
| C | -1.142768 | 2.417462  | 0.501877  |
| H | -0.377137 | 2.316250  | -0.273928 |
| H | -1.887899 | 3.136698  | 0.154831  |
| H | -0.662995 | 2.863818  | 1.380212  |
| H | -3.408437 | -0.058881 | 1.505858  |
| H | -5.086210 | 1.791303  | 1.197794  |
| H | -3.944400 | 2.667025  | 0.161177  |
| H | -5.268064 | 1.369033  | -1.394390 |
| H | -5.310582 | -0.039412 | -0.341419 |
| H | -3.804041 | -0.166486 | -2.443037 |
| H | -2.694709 | 0.942164  | -1.628474 |
| O | -3.458122 | -2.144850 | -1.219633 |
| H | -1.248619 | -2.192890 | 0.018795  |
| N | 0.269508  | -0.226793 | 1.090893  |
| C | 0.756098  | 0.594462  | 2.217274  |
| H | -0.101314 | 0.960417  | 2.782267  |
| H | 1.360827  | 1.435508  | 1.867678  |
| H | 1.355696  | -0.043221 | 2.869368  |
| S | 1.526624  | -1.337699 | 0.416896  |
| O | 0.875147  | -2.066189 | -0.665246 |
| O | 2.089461  | -1.996789 | 1.587041  |
| C | 2.704391  | -0.186762 | -0.260186 |
| C | 2.487684  | 0.324565  | -1.545049 |
| H | 1.621351  | 0.017511  | -2.121488 |
| C | 3.428347  | 1.204161  | -2.076016 |
| H | 3.285734  | 1.605408  | -3.074555 |
| C | 4.560593  | 1.554280  | -1.333021 |
| H | 5.291943  | 2.235999  | -1.756632 |
| C | 4.766599  | 1.022839  | -0.057738 |
| H | 5.656500  | 1.283904  | 0.506282  |
| C | 3.835880  | 0.141725  | 0.492789  |
| H | 3.991817  | -0.301348 | 1.470384  |
| H | -3.075938 | -2.953677 | -0.830081 |

0 imaginary frequencies

E = -1300.012090

H = -1299.651077

G = -1299.719354

E<sub>M06-2X</sub> = -1299.864964

E<sub>solv</sub> = -1300.070073

# [H<sup>+</sup>]TS7

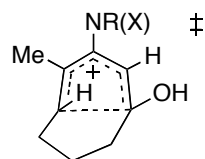

|   |           |           |           |
|---|-----------|-----------|-----------|
| C | 2.569022  | 1.084567  | -1.105878 |
| C | 2.763178  | -0.025776 | -0.276839 |
| C | 3.948227  | -0.220426 | 0.438907  |
| C | 4.958495  | 0.734781  | 0.326174  |
| C | 4.777220  | 1.855328  | -0.487690 |
| C | 3.588779  | 2.028734  | -1.204070 |
| S | 1.472607  | -1.250473 | -0.155019 |
| O | 0.708385  | -1.276578 | -1.405928 |
| N | 0.335533  | -0.582594 | 1.009656  |
| C | 0.884078  | -0.175901 | 2.311178  |
| C | -0.859042 | -0.080281 | 0.551542  |
| C | -1.722028 | -0.783644 | -0.379929 |
| C | -2.630559 | 0.090059  | -1.028062 |
| C | -2.847609 | 1.259218  | 0.551312  |
| C | -1.495082 | 1.047541  | 1.033743  |
| C | -4.105723 | 0.487552  | 0.955721  |
| C | -4.968950 | 0.273675  | -0.306282 |
| C | -4.037271 | -0.320143 | -1.410292 |
| C | -1.822379 | -2.276857 | -0.397952 |
| O | -3.055289 | 2.568826  | 0.262073  |
| O | 2.006608  | -2.454737 | 0.467492  |
| H | -1.013981 | 1.812510  | 1.636188  |
| H | -3.813140 | -0.470804 | 1.393922  |
| H | -4.636862 | 1.055696  | 1.731160  |
| H | -5.385165 | 1.229582  | -0.648385 |
| H | -5.824333 | -0.373477 | -0.094284 |
| H | -4.311295 | 0.058186  | -2.397995 |
| H | -4.140226 | -1.407288 | -1.443485 |
| H | -1.615474 | -2.663090 | -1.401613 |
| H | -1.123053 | -2.736881 | 0.301156  |
| H | -2.839091 | -2.589755 | -0.131082 |
| H | 1.624177  | -0.916229 | 2.619515  |
| H | 1.351309  | 0.815053  | 2.278139  |
| H | 0.074698  | -0.177413 | 3.045505  |
| H | 1.654999  | 1.189601  | -1.680663 |
| H | 3.461748  | 2.892535  | -1.849222 |
| H | 5.569740  | 2.592658  | -0.573592 |
| H | 5.889438  | 0.596860  | 0.867143  |
| H | 4.080507  | -1.108914 | 1.046796  |
| H | -2.190121 | 0.930979  | -1.558387 |
| H | -4.004091 | 2.785277  | 0.253297  |

1 imaginary frequency

E = -1299.995960

H = -1299.637531

G = -1299.703595

E<sub>M06-2X</sub> = -1299.853052

E<sub>solv</sub> = -1300.055607

[H<sup>+</sup>]7

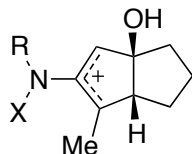

|   |          |          |          |
|---|----------|----------|----------|
| C | -3.18775 | 1.26190  | -0.19594 |
| C | -2.80599 | 0.00507  | 0.28494  |
| C | -3.72973 | -1.02246 | 0.49830  |
| C | -5.07197 | -0.78148 | 0.20420  |
| C | -5.46913 | 0.46359  | -0.28789 |
| C | -4.53198 | 1.48307  | -0.48491 |
| S | -1.10114 | -0.28446 | 0.70187  |
| O | -0.97805 | -1.55065 | 1.42865  |
| N | -0.32934 | -0.49028 | -0.87677 |
| C | -0.73604 | -1.73278 | -1.56862 |
| C | 1.06682  | -0.29758 | -0.73681 |
| C | 1.70023  | 0.97241  | -0.85023 |
| C | 3.16627  | 0.86100  | -0.62772 |
| C | 3.40713  | -0.64890 | -0.32628 |
| C | 2.03581  | -1.24081 | -0.47094 |
| H | 1.85057  | -2.30751 | -0.37454 |
| C | 3.90357  | -0.69494 | 1.15025  |
| C | 3.46617  | 0.64076  | 1.77571  |
| C | 3.65932  | 1.64934  | 0.63043  |
| C | 1.00716  | 2.23337  | -1.14075 |
| H | 0.59459  | 2.61088  | -0.19076 |
| H | 0.14097  | 2.05415  | -1.78734 |
| H | 1.67420  | 2.99052  | -1.55895 |
| O | 4.29542  | -1.21138 | -1.27482 |
| O | -0.47781 | 0.93795  | 1.22569  |
| H | 3.69632  | 1.17170  | -1.53692 |
| H | 3.13367  | 2.59601  | 0.78087  |
| H | 4.72038  | 1.87786  | 0.48856  |
| H | 4.05159  | 0.89426  | 2.66340  |
| H | 2.41290  | 0.60280  | 2.07937  |
| H | 4.99908  | -0.74220 | 1.09446  |
| H | 3.55414  | -1.57504 | 1.69990  |
| H | -1.81681 | -1.70371 | -1.71948 |
| H | -0.25569 | -1.74726 | -2.54981 |
| H | -0.48091 | -2.64110 | -1.01042 |
| H | -2.45491 | 2.05148  | -0.32068 |
| H | -4.85052 | 2.45275  | -0.85450 |
| H | -6.51602 | 0.64541  | -0.51162 |
| H | -5.80577 | -1.56441 | 0.36775  |
| H | -3.40322 | -1.97534 | 0.90026  |
| H | 4.68309  | -2.02467 | -0.91066 |

0 Imaginary Frequencies

E = -1300.004998

H = -1299.646279

G = -1299.714300

E<sub>M06-2X</sub> = -1299.864628

E<sub>solv</sub> = -1300.064629

# [H<sup>+</sup>]TS14

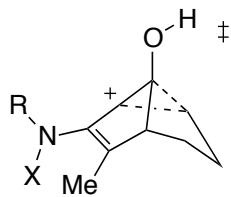

|   |          |          |          |
|---|----------|----------|----------|
| C | 3.55986  | -1.17341 | -0.29633 |
| C | 2.72367  | -0.05416 | -0.25875 |
| C | 3.21576  | 1.23883  | -0.05048 |
| C | 4.58534  | 1.40444  | 0.14193  |
| C | 5.43708  | 0.29547  | 0.11565  |
| C | 4.92900  | -0.98662 | -0.10571 |
| S | 0.98286  | -0.27183 | -0.55261 |
| O | 0.71983  | -1.65584 | -0.98813 |
| N | 0.26019  | -0.06138 | 1.03042  |
| C | 0.74308  | -1.01671 | 2.04980  |
| C | -1.15319 | 0.00560  | 0.89137  |
| C | -1.89768 | 1.15137  | 0.83412  |
| C | -3.34670 | 0.81201  | 0.52590  |
| C | -3.34288 | -0.70305 | 0.52728  |
| C | -2.02135 | -1.14649 | 0.67737  |
| H | -1.70989 | -2.18298 | 0.75978  |
| C | -2.75988 | -1.01731 | -1.30258 |
| H | -3.63797 | -1.64042 | -1.47920 |
| H | -1.84294 | -1.56149 | -1.54022 |
| C | -2.81474 | 0.40185  | -1.83495 |
| C | -3.72562 | 1.24073  | -0.92009 |
| C | -1.39203 | 2.54567  | 0.92483  |
| H | -0.38200 | 2.55974  | 1.33931  |
| H | -2.05416 | 3.16631  | 1.53900  |
| H | -1.34570 | 3.00378  | -0.07224 |
| O | -4.50245 | -1.33792 | 0.75761  |
| H | -4.36961 | -2.28383 | 0.94540  |
| O | 0.45620  | 0.84681  | -1.34327 |
| H | -4.04992 | 1.20175  | 1.26916  |
| H | -3.59993 | 2.31613  | -1.07110 |
| H | -4.78163 | 1.00110  | -1.08488 |
| H | -3.19558 | 0.36073  | -2.86355 |
| H | -1.80598 | 0.81871  | -1.88754 |
| H | 0.51320  | -2.06334 | 1.81004  |
| H | 1.82449  | -0.90968 | 2.15099  |
| H | 0.28280  | -0.74666 | 3.00306  |
| H | 3.14501  | -2.15740 | -0.48563 |
| H | 5.59718  | -1.84151 | -0.13724 |
| H | 6.50426  | 0.43400  | 0.26108  |
| H | 4.98951  | 2.39904  | 0.30260  |
| H | 2.54505  | 2.09120  | -0.05573 |

1 Imaginary Frequency

E = -1299.983787

H = -1299.625858

G = -1299.691702

E<sub>M06-2X</sub> = -1299.847927

E<sub>solv</sub> = -1300.042359

## 14

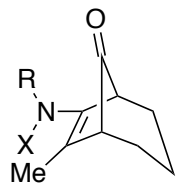

|   |          |          |          |
|---|----------|----------|----------|
| C | 3.30762  | 0.07190  | 0.74134  |
| C | 2.29332  | -0.03099 | -0.21414 |
| C | 1.98010  | 1.03549  | -1.06235 |
| C | 2.68981  | 2.22946  | -0.93683 |
| C | 3.70181  | 2.34760  | 0.01958  |
| C | 4.01316  | 1.27069  | 0.85255  |
| S | 1.34572  | -1.55530 | -0.32863 |
| O | 2.12873  | -2.61326 | 0.31538  |
| N | -0.04380 | -1.34631 | 0.65923  |
| C | 0.20380  | -1.37683 | 2.10765  |
| C | -1.05170 | -0.45606 | 0.19319  |
| C | -1.99273 | -0.76273 | -0.72851 |
| C | -2.85183 | 0.46829  | -0.98977 |
| C | -1.86013 | 1.56264  | -0.58898 |
| C | -1.20383 | 0.98995  | 0.67166  |
| H | -0.26961 | 1.49737  | 0.92702  |
| C | -2.27221 | 1.16363  | 1.79767  |
| H | -2.47798 | 2.23749  | 1.90147  |
| H | -1.87013 | 0.82676  | 2.76083  |
| C | -3.57214 | 0.39771  | 1.47225  |
| C | -4.04102 | 0.58724  | 0.01334  |
| C | -2.22323 | -2.06296 | -1.42606 |
| H | -3.28477 | -2.34144 | -1.38633 |
| H | -1.62439 | -2.86244 | -0.98503 |
| H | -1.94552 | -1.98926 | -2.48501 |
| O | -1.64569 | 2.62126  | -1.13088 |
| O | 0.86379  | -1.67549 | -1.70361 |
| H | -3.19809 | 0.56582  | -2.02414 |
| H | -4.81374 | -0.15198 | -0.23093 |
| H | -4.49698 | 1.57745  | -0.11820 |
| H | -4.36706 | 0.70695  | 2.16099  |
| H | -3.40798 | -0.67061 | 1.65212  |
| H | 0.88241  | -2.20034 | 2.33041  |
| H | 0.62943  | -0.43818 | 2.49099  |
| H | -0.75001 | -1.56473 | 2.60782  |
| H | 3.54935  | -0.78263 | 1.36411  |
| H | 4.80967  | 1.35996  | 1.58588  |
| H | 4.25350  | 3.27915  | 0.11061  |
| H | 2.45315  | 3.06438  | -1.58963 |
| H | 1.20428  | 0.92513  | -1.81208 |

0 Imaginary Frequencies

E = -1299.665775

H = -1299.317346

G = -1299.383245

E<sub>M06-2X</sub> = -1299.537327

E<sub>solv</sub> = -1299.686708

[H<sub>2</sub>O]1

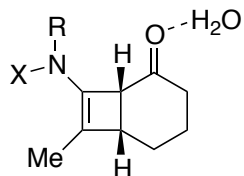

|   |          |          |          |
|---|----------|----------|----------|
| C | -0.41325 | 1.83234  | 0.97501  |
| C | 0.80207  | 2.68274  | 0.83952  |
| H | 0.93775  | 3.02775  | -0.19446 |
| H | 0.71086  | 3.58117  | 1.46408  |
| H | 1.70704  | 2.14414  | 1.13369  |
| C | -0.66719 | 0.53457  | 1.22885  |
| C | -2.19617 | 0.68237  | 1.20725  |
| H | -2.68021 | 0.50512  | 2.17495  |
| C | -1.89338 | 2.19536  | 0.88652  |
| H | -2.21005 | 2.86445  | 1.69855  |
| C | -2.88081 | -0.18149 | 0.16239  |
| O | -3.15528 | -1.34193 | 0.44285  |
| C | -3.19219 | 0.40836  | -1.19996 |
| H | -3.09217 | -0.39877 | -1.93415 |
| H | -4.26040 | 0.67986  | -1.17238 |
| C | -2.35986 | 1.64589  | -1.56040 |
| H | -2.72543 | 2.06399  | -2.50547 |
| H | -1.31973 | 1.34378  | -1.73216 |
| C | -2.42907 | 2.71066  | -0.45738 |
| H | -3.47437 | 3.02457  | -0.32551 |
| H | -1.87230 | 3.61010  | -0.75257 |
| N | 0.13555  | -0.60402 | 1.46879  |
| C | -0.36436 | -1.50673 | 2.53102  |
| S | 0.78066  | -1.38774 | 0.07893  |
| H | -0.37395 | -0.93511 | 3.46337  |
| H | -1.37232 | -1.87403 | 2.31063  |
| H | 0.31879  | -2.34875 | 2.63303  |
| O | -0.12377 | -1.23037 | -1.07432 |
| O | 1.19335  | -2.72216 | 0.51949  |
| C | 2.25199  | -0.42402 | -0.28096 |
| C | 3.29087  | -0.39527 | 0.65380  |
| C | 4.45417  | 0.30729  | 0.34730  |
| C | 4.57525  | 0.96212  | -0.88297 |
| C | 3.53503  | 0.91334  | -1.81155 |
| C | 2.36209  | 0.21507  | -1.51532 |
| H | 1.54451  | 0.15624  | -2.22518 |
| H | 3.18823  | -0.91525 | 1.60056  |
| H | 5.26881  | 0.33926  | 1.06498  |
| H | 5.48589  | 1.50611  | -1.11770 |
| H | 3.63423  | 1.41440  | -2.77013 |
| H | -2.99880 | -2.52684 | -1.25244 |
| O | -2.59462 | -2.68862 | -2.12387 |
| H | -1.66442 | -2.46121 | -1.95803 |

0 Imaginary Frequencies

E = -1376.071071

H = -1375.695419

G = -1375.768619

E<sub>M06-2X</sub> = -1375.948130

E<sub>solv</sub> = -1376.093684



## [H<sub>2</sub>O]TS2

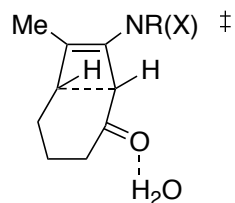

|   |          |          |          |
|---|----------|----------|----------|
| C | -1.07794 | -0.69700 | -0.54478 |
| C | -2.26245 | -1.35234 | -0.77540 |
| C | -2.62853 | -2.78742 | -0.50874 |
| H | -2.53597 | -3.40612 | -1.41203 |
| H | -1.98870 | -3.22427 | 0.26400  |
| H | -3.66642 | -2.87818 | -0.17231 |
| C | -3.13953 | -0.29973 | -1.24591 |
| H | -2.91249 | 0.18444  | -2.18999 |
| C | -4.53066 | -0.12599 | -0.68968 |
| H | -4.88865 | -1.09921 | -0.33238 |
| H | -5.23317 | 0.21695  | -1.45801 |
| C | -4.54089 | 0.86278  | 0.51253  |
| H | -4.68405 | 1.88733  | 0.15052  |
| H | -5.39118 | 0.63656  | 1.16609  |
| C | -3.21773 | 0.81370  | 1.30797  |
| H | -3.31266 | 1.40698  | 2.22135  |
| H | -2.96386 | -0.21431 | 1.58434  |
| C | -2.12673 | 1.46436  | 0.46847  |
| O | -1.98614 | 2.69183  | 0.54630  |
| C | -1.33439 | 0.71706  | -0.52160 |
| H | -0.61998 | 1.37831  | -1.01966 |
| N | 0.22430  | -1.22620 | -0.47124 |
| C | 0.59479  | -2.41261 | -1.25253 |
| H | 1.66784  | -2.38641 | -1.46458 |
| H | 0.05792  | -2.36521 | -2.20247 |
| H | 0.36228  | -3.35211 | -0.74156 |
| S | 1.18552  | -0.93518 | 0.92607  |
| O | 0.44923  | 0.02425  | 1.74852  |
| O | 1.58027  | -2.24593 | 1.45557  |
| C | 2.65802  | -0.14730 | 0.26977  |
| C | 2.60062  | 1.19117  | -0.12930 |
| C | 3.76030  | 1.78727  | -0.62303 |
| C | 4.94935  | 1.05819  | -0.71160 |
| C | 4.98985  | -0.27611 | -0.30225 |
| C | 3.83909  | -0.88936 | 0.19555  |
| H | 3.85033  | -1.91816 | 0.53849  |
| H | 5.91658  | -0.83977 | -0.36251 |
| H | 5.84843  | 1.53293  | -1.09548 |
| H | 3.72525  | 2.82774  | -0.93179 |
| H | 1.68737  | 1.77480  | -0.06394 |
| H | -0.41736 | 3.39885  | -0.14914 |
| O | 0.41367  | 3.59680  | -0.63639 |
| H | 0.10468  | 4.00954  | -1.45617 |

1 Imaginary Frequency

E = -1376.024800

H = -1375.651240

G = -1375.725422

E<sub>M06-2X</sub> = -1375.894778

E<sub>solv</sub> = -1376.047223

**[H<sub>2</sub>O]2-*E,E***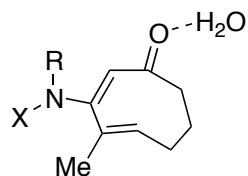

|   |          |          |          |
|---|----------|----------|----------|
| C | 0.94929  | -0.00131 | -1.64805 |
| C | 2.24822  | -0.18203 | -1.98326 |
| C | 3.23833  | 0.90334  | -2.23600 |
| C | 3.92274  | 1.09438  | -0.83949 |
| C | 2.93014  | 0.98677  | 0.35081  |
| C | 2.56537  | -0.45500 | 0.76017  |
| C | 1.26359  | -1.11604 | 0.48797  |
| C | 0.44683  | -0.89183 | -0.58450 |
| C | 0.10327  | 1.17973  | -2.07038 |
| H | -0.13809 | 1.83432  | -1.22341 |
| H | 0.60394  | 1.77692  | -2.83649 |
| H | -0.85367 | 0.84816  | -2.48934 |
| H | 2.69591  | -1.13881 | -1.71716 |
| H | 3.99532  | 0.64601  | -2.98564 |
| H | 2.75808  | 1.83702  | -2.54594 |
| H | 4.42563  | 2.06741  | -0.80659 |
| H | 4.70451  | 0.33877  | -0.70392 |
| H | 3.44058  | 1.40039  | 1.22685  |
| H | 2.03215  | 1.58244  | 0.15547  |
| O | 3.38730  | -1.09204 | 1.42847  |
| H | 0.99490  | -1.86510 | 1.22374  |
| N | -0.84864 | -1.44991 | -0.69020 |
| C | -1.39344 | -1.80851 | -2.00976 |
| H | -0.56007 | -1.83269 | -2.71353 |
| H | -2.13939 | -1.08764 | -2.36604 |
| H | -1.85340 | -2.79598 | -1.96129 |
| S | -1.98160 | -1.41697 | 0.59499  |
| O | -1.26242 | -1.61230 | 1.85116  |
| O | -3.05923 | -2.31060 | 0.16925  |
| C | -2.61966 | 0.26167  | 0.59254  |
| C | -1.96420 | 1.24105  | 1.34452  |
| H | -1.10911 | 0.97156  | 1.95465  |
| C | -2.44657 | 2.54940  | 1.31325  |
| H | -1.95209 | 3.31876  | 1.89932  |
| C | -3.56964 | 2.86624  | 0.54400  |
| H | -3.94331 | 3.88623  | 0.52765  |
| C | -4.22264 | 1.87462  | -0.19131 |
| H | -5.10580 | 2.11965  | -0.77429 |
| C | -3.75080 | 0.56147  | -0.17077 |
| H | -4.26133 | -0.22761 | -0.71240 |
| H | 4.93295  | -0.13504 | 1.94951  |
| O | 5.58049  | 0.56049  | 2.18813  |
| H | 5.60421  | 0.52805  | 3.15583  |

0 Imaginary Frequencies

E = -1376.053156

H = -1375.677679

G = -1375.754799

E<sub>M06-2X</sub> = -1375.930310E<sub>solv</sub> = -1376.076381

# [H<sub>2</sub>O]TS7

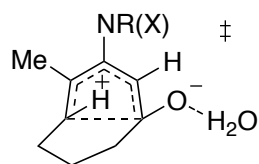

|   |          |          |          |
|---|----------|----------|----------|
| C | 1.73069  | 1.46672  | -0.65847 |
| C | 2.61197  | 0.43480  | -0.31255 |
| C | 3.92073  | 0.69826  | 0.09894  |
| C | 4.35755  | 2.02212  | 0.15797  |
| C | 3.48900  | 3.06179  | -0.17947 |
| C | 2.17994  | 2.78464  | -0.58194 |
| S | 2.06533  | -1.27636 | -0.38226 |
| O | 1.33191  | -1.48271 | -1.63257 |
| N | 0.89142  | -1.44189 | 0.87214  |
| C | 1.40802  | -1.26053 | 2.23707  |
| C | -0.38987 | -0.92383 | 0.56078  |
| C | -1.28671 | -1.57178 | -0.31902 |
| C | -2.33554 | -0.65153 | -0.73999 |
| H | -1.97658 | 0.01029  | -1.52840 |
| C | -2.29582 | 0.55307  | 0.53726  |
| C | -0.99658 | 0.18245  | 1.14609  |
| C | -3.66248 | 0.21804  | 1.17846  |
| C | -4.58924 | -0.09588 | -0.00854 |
| C | -3.79203 | -1.09455 | -0.88704 |
| C | -1.21261 | -3.01910 | -0.66239 |
| O | 3.18974  | -2.12850 | 0.00449  |
| H | -0.52224 | 0.84835  | 1.85969  |
| H | -3.57103 | -0.65628 | 1.83804  |
| H | -4.00778 | 1.07085  | 1.77079  |
| H | -4.77410 | 0.83903  | -0.54852 |
| H | -5.55848 | -0.50048 | 0.30224  |
| H | -4.13363 | -1.09273 | -1.92757 |
| H | -3.93096 | -2.11221 | -0.50050 |
| H | -2.21317 | -3.46046 | -0.70909 |
| H | -0.76390 | -3.12482 | -1.65895 |
| H | -0.58690 | -3.57537 | 0.04028  |
| H | 0.64198  | -1.60827 | 2.93460  |
| H | 2.29881  | -1.87869 | 2.35441  |
| H | 1.65796  | -0.21615 | 2.46891  |
| H | 0.71082  | 1.26357  | -0.96680 |
| H | 1.50165  | 3.59271  | -0.83847 |
| H | 3.83168  | 4.09150  | -0.12837 |
| H | 5.37602  | 2.23854  | 0.46727  |
| H | 4.57888  | -0.12531 | 0.35303  |
| H | -3.48006 | 2.84817  | -0.00867 |
| O | -4.33825 | 3.29025  | -0.21719 |
| H | -4.22329 | 3.56720  | -1.13818 |
| O | -2.05378 | 1.77937  | 0.11681  |

1 Imaginary Frequency

E = -1376.006894

H = -1375.634939

G = -1375.708136

E<sub>M06-2X</sub> = -1375.876400

E<sub>solv</sub> = -1376.031114

[H<sub>2</sub>O]7

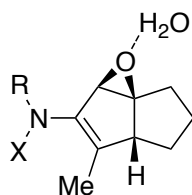

|                         |              |          |          |
|-------------------------|--------------|----------|----------|
| C                       | -3.16485     | 0.89981  | -1.06479 |
| C                       | -2.96390     | 0.34138  | 0.20034  |
| C                       | -3.99401     | -0.30188 | 0.88656  |
| C                       | -5.24972     | -0.39988 | 0.28327  |
| C                       | -5.46159     | 0.14412  | -0.98430 |
| C                       | -4.42209     | 0.79523  | -1.65597 |
| S                       | -1.35112     | 0.49830  | 0.97439  |
| O                       | -1.48595     | 0.06734  | 2.37529  |
| N                       | -0.42186     | -0.63590 | 0.08319  |
| C                       | -0.67910     | -2.04692 | 0.44265  |
| C                       | 0.96317      | -0.29284 | -0.02604 |
| C                       | 1.58638      | 0.00053  | -1.18552 |
| C                       | 3.07845      | 0.17591  | -0.96251 |
| C                       | 3.25361      | -0.07052 | 0.54513  |
| C                       | 1.92955      | -0.33042 | 1.11500  |
| H                       | 1.63894      | -0.09222 | 2.13445  |
| C                       | 4.34392      | 0.82186  | 1.08364  |
| C                       | 4.12415      | 2.09111  | 0.23042  |
| C                       | 3.70898      | 1.58526  | -1.18176 |
| C                       | 0.97938      | 0.01570  | -2.54895 |
| H                       | 1.22335      | 0.94279  | -3.08357 |
| H                       | -0.10715     | -0.08804 | -2.49681 |
| H                       | 1.37876      | -0.81811 | -3.14138 |
| O                       | 2.96092      | -1.39118 | 1.02345  |
| O                       | -0.79725     | 1.81718  | 0.65465  |
| H                       | 3.61180      | -0.58316 | -1.54913 |
| H                       | 3.01851      | 2.28094  | -1.66873 |
| H                       | 4.58844      | 1.49945  | -1.82896 |
| H                       | 5.00838      | 2.73515  | 0.19601  |
| H                       | 3.30858      | 2.67840  | 0.66774  |
| H                       | 5.32724      | 0.37523  | 0.88265  |
| H                       | 4.26805      | 1.00036  | 2.16024  |
| H                       | -1.73304     | -2.27881 | 0.26243  |
| H                       | -0.05528     | -2.66352 | -0.20908 |
| H                       | -0.43968     | -2.26193 | 1.49145  |
| H                       | -2.35177     | 1.41602  | -1.56428 |
| H                       | -4.59340     | 1.22582  | -2.63844 |
| H                       | -6.44032     | 0.06682  | -1.44985 |
| H                       | -6.06112     | -0.89711 | 0.80705  |
| H                       | -3.80930     | -0.70268 | 1.87742  |
| H                       | 2.52822      | -2.63407 | -0.36031 |
| O                       | 2.25180      | -3.15124 | -1.14429 |
| H                       | 2.63156      | -4.03026 | -0.99724 |
| 0 Imaginary Frequencies |              |          |          |
| E =                     | -1376.052133 |          |          |
| H =                     | -1375.676901 |          |          |
| G =                     | -1375.751665 |          |          |
| E <sub>M06-2X</sub> =   | -1375.931181 |          |          |
| E <sub>solv</sub> =     | -1376.073458 |          |          |

## Cyclobutenamide 8

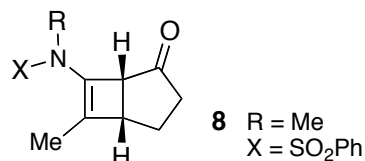

|   |           |           |           |
|---|-----------|-----------|-----------|
| C | 1.492145  | 0.600116  | -0.057487 |
| C | 2.742552  | 1.033596  | 0.223536  |
| C | 3.380512  | 2.101783  | 1.048278  |
| H | 3.981094  | 2.767780  | 0.413706  |
| H | 4.067730  | 1.676152  | 1.793297  |
| H | 2.650676  | 2.719570  | 1.578300  |
| C | 3.396115  | -0.045137 | -0.638592 |
| C | 1.950177  | -0.576974 | -0.917898 |
| H | 1.570121  | -0.628620 | -1.939015 |
| H | 3.933461  | 0.340477  | -1.512787 |
| C | 4.164939  | -1.176881 | 0.083018  |
| C | 3.085332  | -2.073759 | 0.718919  |
| C | 1.840739  | -1.894791 | -0.160192 |
| O | 0.909609  | -2.673982 | -0.218483 |
| H | 3.356402  | -3.131321 | 0.783525  |
| H | 2.827837  | -1.750235 | 1.736259  |
| H | 4.887076  | -0.794949 | 0.813312  |
| H | 4.734024  | -1.753026 | -0.656916 |
| N | 0.202656  | 0.908603  | 0.400516  |
| C | 0.042256  | 1.662628  | 1.649225  |
| S | -1.046384 | 1.161836  | -0.754568 |
| H | 0.240335  | 2.733041  | 1.527362  |
| H | -0.979689 | 1.536741  | 2.016744  |
| H | 0.728285  | 1.238746  | 2.386260  |
| O | -1.520531 | 2.544576  | -0.625580 |
| O | -0.543405 | 0.654503  | -2.031084 |
| C | -2.349240 | 0.082316  | -0.154712 |
| C | -3.558752 | 0.651269  | 0.246667  |
| C | -4.400720 | -1.571247 | 0.692786  |
| C | -3.183006 | -2.123865 | 0.283899  |
| C | -2.144245 | -1.300820 | -0.147921 |
| H | -1.195221 | -1.728321 | -0.459486 |
| H | -3.038602 | -3.200231 | 0.299843  |
| H | -5.204721 | -2.221956 | 1.026031  |
| H | -5.536614 | 0.239513  | 0.988447  |
| H | -3.682390 | 1.728262  | 0.215544  |
| C | -4.589079 | -0.188565 | 0.673843  |

0 imaginary frequencies

E = -1260.328932

H = -1260.011556

G = -1260.075980

E<sub>M06-2X</sub> = -1260.200982

E<sub>solv</sub> = -1260.349318

# TS9

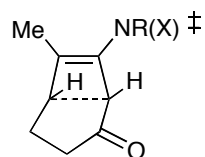

|   |           |           |           |
|---|-----------|-----------|-----------|
| C | 2.031635  | 0.745909  | -1.381755 |
| C | 2.314493  | 0.013612  | -0.225104 |
| C | 3.296487  | 0.427593  | 0.678300  |
| C | 4.000775  | 1.604149  | 0.419009  |
| C | 3.721264  | 2.350306  | -0.727744 |
| C | 2.742122  | 1.920266  | -1.627287 |
| S | 1.368499  | -1.473986 | 0.124296  |
| O | 0.922336  | -2.027113 | -1.152978 |
| N | -0.029730 | -0.936296 | 0.958278  |
| C | 0.181190  | -0.568538 | 2.368680  |
| C | -1.053487 | -0.283387 | 0.223261  |
| C | -1.558991 | 1.014020  | 0.567754  |
| C | -2.971915 | 1.375519  | 0.881043  |
| O | -3.201678 | 2.382410  | 1.538887  |
| C | -1.788719 | -0.796302 | -0.826070 |
| C | -2.436534 | 0.368622  | -1.364260 |
| C | -3.930392 | 0.513959  | -1.270169 |
| C | -4.134950 | 0.566869  | 0.271818  |
| C | -2.114820 | -2.223899 | -1.158388 |
| O | 2.124330  | -2.270935 | 1.091913  |
| H | -1.558033 | -2.562328 | -2.038819 |
| H | -1.848145 | -2.888455 | -0.331746 |
| H | -3.183326 | -2.343498 | -1.376520 |
| H | -1.847952 | 1.163992  | -1.808078 |
| H | -4.481441 | -0.322940 | -1.715378 |
| H | -4.275772 | 1.437156  | -1.745287 |
| H | -4.125899 | -0.454326 | 0.672806  |
| H | -5.073055 | 1.043221  | 0.566229  |
| H | -0.880611 | 1.772461  | 0.969868  |
| H | 0.769515  | 0.350552  | 2.489211  |
| H | 0.686796  | -1.390376 | 2.875601  |
| H | -0.801094 | -0.414304 | 2.819833  |
| H | 1.285323  | 0.384621  | -2.080911 |
| H | 2.537129  | 2.495469  | -2.525668 |
| H | 4.273154  | 3.264905  | -0.925874 |
| H | 4.771828  | 1.932844  | 1.109889  |
| H | 3.514870  | -0.178244 | 1.551069  |

1 imaginary frequency

E = -1260.274152

H = -1259.959032

G = -1260.023539

$E_{M06-2X} = -1260.145252$

$E_{solv} = -1260.295250$

## 9-E,E

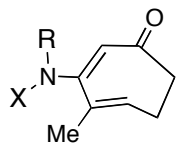

|   |           |           |           |
|---|-----------|-----------|-----------|
| C | 1.768364  | 1.060684  | -1.226215 |
| C | 2.229500  | 0.130430  | -0.290451 |
| C | 3.301250  | 0.414340  | 0.559160  |
| C | 3.917542  | 1.663165  | 0.471490  |
| C | 3.462404  | 2.606163  | -0.452403 |
| C | 2.393450  | 2.304761  | -1.300451 |
| S | 1.407718  | -1.460194 | -0.162464 |
| O | 0.857253  | -1.789643 | -1.474670 |
| N | 0.072476  | -1.192721 | 0.905212  |
| C | 0.418545  | -1.181375 | 2.333972  |
| C | -1.008184 | -0.406331 | 0.452355  |
| C | -1.624322 | 0.520756  | 1.256381  |
| C | -2.936206 | 1.218018  | 1.040660  |
| O | -3.181232 | 2.180574  | 1.758485  |
| C | -1.724151 | -0.682333 | -0.803145 |
| C | -2.233749 | 0.450901  | -1.345726 |
| C | -3.709251 | 0.687638  | -1.469053 |
| C | -4.062875 | 0.741861  | 0.059975  |
| C | -2.232635 | -2.077681 | -1.077508 |
| O | 2.294467  | -2.379517 | 0.551017  |
| H | -1.407759 | -2.714659 | -1.410579 |
| H | -2.665626 | -2.542614 | -0.182461 |
| H | -2.989024 | -2.068121 | -1.868017 |
| H | -1.687980 | 1.371092  | -1.140703 |
| H | -3.942357 | 1.632120  | -1.969764 |
| H | -4.273099 | -0.110365 | -1.960757 |
| H | -4.913927 | 1.398242  | 0.264390  |
| H | -4.333253 | -0.275076 | 0.374903  |
| H | -1.175595 | 0.824722  | 2.198333  |
| H | 0.874974  | -0.233902 | 2.651126  |
| H | 1.106161  | -2.001811 | 2.532308  |
| H | -0.502929 | -1.336894 | 2.899530  |
| H | 0.949635  | 0.803393  | -1.889999 |
| H | 2.049723  | 3.036403  | -2.025840 |
| H | 3.946319  | 3.576650  | -0.517223 |
| H | 4.757027  | 1.895144  | 1.120463  |
| H | 3.654896  | -0.339468 | 1.254326  |

0 imaginary frequencies

E = -1260.293844

H = -1259.976672

G = -1260.041250

E<sub>M06-2X</sub> = -1260.167396

E<sub>solv</sub> = -1260.314168

## 10

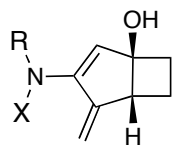

|   |           |           |           |
|---|-----------|-----------|-----------|
| C | 4.121249  | 0.038406  | 0.293038  |
| C | 2.814866  | 0.692041  | 0.862435  |
| C | 2.435606  | 1.070515  | -0.612966 |
| C | 3.870398  | 0.730162  | -1.074152 |
| C | 1.373541  | 0.055296  | -0.947599 |
| C | 0.965699  | -0.625463 | 0.145968  |
| C | 1.726439  | -0.226033 | 1.356247  |
| N | -0.076350 | -1.589400 | 0.250481  |
| C | 0.337745  | -2.996726 | 0.433039  |
| C | 1.462105  | -0.587756 | 2.617798  |
| O | 2.062152  | 2.397524  | -0.939687 |
| S | -1.476710 | -1.378004 | -0.709717 |
| O | -2.398273 | -2.427024 | -0.264121 |
| C | -2.055994 | 0.219079  | -0.128399 |
| C | -2.077446 | 1.298110  | -1.012632 |
| C | -2.565890 | 2.527470  | -0.565317 |
| C | -3.027559 | 2.662058  | 0.745572  |
| C | -3.010459 | 1.568362  | 1.616054  |
| C | -2.526493 | 0.335656  | 1.181390  |
| O | -1.160604 | -1.251414 | -2.139998 |
| H | 0.977599  | -0.071108 | -1.948476 |
| H | 2.058269  | -0.219774 | 3.447858  |
| H | 0.636110  | -1.250404 | 2.859003  |
| H | 3.011445  | 1.546084  | 1.515052  |
| H | 4.054187  | -1.052238 | 0.247430  |
| H | 5.046012  | 0.309146  | 0.809311  |
| H | 4.448824  | 1.652231  | -1.187412 |
| H | 3.976183  | 0.127053  | -1.981121 |
| H | 1.096647  | -3.015831 | 1.217266  |
| H | -0.525028 | -3.585217 | 0.744965  |
| H | 0.761870  | -3.420385 | -0.486168 |
| H | -1.725377 | 1.164394  | -2.029594 |
| H | -2.590717 | 3.375741  | -1.243427 |
| H | -3.407537 | 3.620104  | 1.089430  |
| H | -3.377694 | 1.674672  | 2.632664  |
| H | -2.514775 | -0.524542 | 1.842215  |
| H | 1.146760  | 2.524188  | -0.639312 |

0 imaginary frequencies

E = -1260.299365

H = -1259.982633

G = -1260.046929

E<sub>M06-2X</sub> = -1260.185003

E<sub>solv</sub> = -1260.318658



## 11-syn

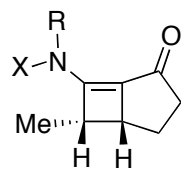

|   |           |           |           |
|---|-----------|-----------|-----------|
| C | 1.619327  | 1.154402  | -1.073297 |
| C | 1.085609  | 0.170003  | -0.016217 |
| C | 2.075147  | -0.747922 | -0.249109 |
| C | 2.702166  | 0.040825  | -1.370138 |
| H | 2.581462  | -0.401225 | -2.369002 |
| H | 0.938913  | 1.344949  | -1.911275 |
| C | 2.137360  | 2.487885  | -0.531807 |
| H | 2.776891  | 2.346940  | 0.346068  |
| H | 2.725786  | 2.997511  | -1.303715 |
| H | 1.303158  | 3.132250  | -0.246873 |
| C | 4.193566  | 0.082509  | -0.968685 |
| H | 4.385075  | 0.886481  | -0.249330 |
| H | 4.876044  | 0.224776  | -1.813412 |
| C | 4.388800  | -1.293014 | -0.267178 |
| H | 5.217529  | -1.329233 | 0.445782  |
| H | 4.562602  | -2.085189 | -1.010592 |
| C | 3.047093  | -1.592222 | 0.448574  |
| O | 2.908283  | -2.310320 | 1.428787  |
| N | 0.118060  | 0.260120  | 0.959403  |
| C | 0.017201  | -0.799939 | 1.983826  |
| S | -1.306865 | 1.197034  | 0.729295  |
| H | -0.135575 | -0.338912 | 2.960445  |
| H | -0.816576 | -1.477183 | 1.764301  |
| H | 0.945079  | -1.375265 | 1.984306  |
| O | -0.969729 | 2.275615  | -0.197141 |
| O | -1.819572 | 1.455074  | 2.072659  |
| C | -2.452047 | 0.088470  | -0.097439 |
| C | -3.389292 | -0.614734 | 0.663042  |
| C | -4.263868 | -1.488586 | 0.015411  |
| C | -4.195689 | -1.649842 | -1.369596 |
| C | -3.258355 | -0.932728 | -2.118624 |
| C | -2.378864 | -0.056321 | -1.485685 |
| H | -1.660930 | 0.522801  | -2.056673 |
| H | -3.216535 | -1.050855 | -3.197459 |
| H | -4.879114 | -2.330773 | -1.869016 |
| H | -5.001018 | -2.037661 | 0.593934  |
| H | -3.440157 | -0.458456 | 1.735049  |

0 imaginary frequencies

E = -1260.316718

H = -1259.998895

G = -1260.063114

E<sub>M06-2X</sub> = -1260.187291

E<sub>solv</sub> = -1260.336814

## 11-anti

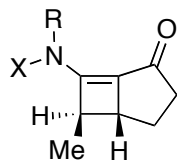

|   |           |           |           |
|---|-----------|-----------|-----------|
| C | -1.805436 | 1.152909  | -1.071438 |
| C | -2.130171 | 2.634793  | -1.247729 |
| H | -1.197105 | 0.791465  | -1.908840 |
| H | -1.218976 | 3.235338  | -1.282983 |
| H | -2.684032 | 2.785621  | -2.182135 |
| H | -2.755975 | 2.996368  | -0.423398 |
| C | -1.261919 | 0.666786  | 0.280381  |
| C | -2.334074 | -0.142811 | 0.530966  |
| C | -3.020569 | 0.190037  | -0.769079 |
| H | -3.970857 | 0.734306  | -0.683289 |
| C | -3.218089 | -1.208950 | -1.391531 |
| H | -2.290322 | -1.537166 | -1.878259 |
| H | -4.021199 | -1.262420 | -2.134544 |
| C | -3.490221 | -2.100462 | -0.145780 |
| H | -3.245048 | -3.158569 | -0.277329 |
| H | -4.549609 | -2.046348 | 0.144969  |
| C | -2.646260 | -1.492045 | 1.009044  |
| O | -2.301145 | -2.076526 | 2.023014  |
| N | -0.113458 | 0.906150  | 1.006804  |
| C | 0.034684  | 0.259037  | 2.324862  |
| S | 1.335703  | 1.469584  | 0.275997  |
| H | 0.505753  | -0.725910 | 2.239577  |
| H | 0.626888  | 0.906822  | 2.971277  |
| H | -0.963282 | 0.118459  | 2.741263  |
| O | 0.950440  | 2.197865  | -0.930630 |
| O | 2.097853  | 2.096052  | 1.353563  |
| C | 2.204722  | -0.019172 | -0.224800 |
| C | 3.116979  | -0.606431 | 0.655438  |
| C | 3.770364  | -1.776579 | 0.267423  |
| C | 3.512604  | -2.342434 | -0.982837 |
| C | 2.605918  | -1.737866 | -1.857540 |
| C | 1.944855  | -0.569110 | -1.483104 |
| H | 1.256899  | -0.074301 | -2.160064 |
| H | 2.418526  | -2.172089 | -2.835286 |
| H | 4.025339  | -3.252735 | -1.280416 |
| H | 4.485271  | -2.241047 | 0.940231  |
| H | 3.323179  | -0.139525 | 1.612410  |

0 imaginary frequencies

E = -1260.317664

H = -1260.000174

G = -1260.065686

$E_{M06-2X} = -1260.188873$

$E_{solv} = -1260.338089$

## TS12-trans

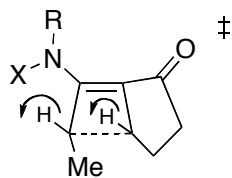

|   |           |           |           |
|---|-----------|-----------|-----------|
| C | -2.374297 | 1.494509  | -0.815174 |
| C | -2.196217 | 0.070840  | -0.528445 |
| C | -3.367627 | -0.510504 | 0.027448  |
| H | -3.775103 | -1.442715 | -0.348114 |
| C | -4.287735 | 0.591858  | 0.520318  |
| H | -4.168796 | 0.747245  | 1.601938  |
| H | -5.347832 | 0.379806  | 0.345285  |
| C | -3.781671 | 1.841159  | -0.265903 |
| H | -3.732063 | 2.759089  | 0.327621  |
| H | -4.439025 | 2.045836  | -1.120141 |
| O | -1.600534 | 2.287687  | -1.329943 |
| C | -1.174094 | -0.827991 | -0.214575 |
| C | -1.702964 | -1.609199 | 0.878412  |
| H | -1.517619 | -2.688509 | 0.858653  |
| C | -1.798375 | -1.070570 | 2.290649  |
| H | -2.620195 | -1.539233 | 2.844542  |
| H | -1.937026 | 0.015060  | 2.309618  |
| H | -0.870022 | -1.306146 | 2.830000  |
| N | -0.042307 | -1.112055 | -0.969651 |
| C | 0.071872  | -0.493901 | -2.304553 |
| S | 1.437220  | -1.521418 | -0.182193 |
| H | 0.960764  | -0.884451 | -2.799048 |
| H | 0.101977  | 0.599162  | -2.243059 |
| H | -0.809405 | -0.790170 | -2.879829 |
| O | 2.257792  | -2.182825 | -1.196279 |
| O | 1.065988  | -2.185375 | 1.067181  |
| C | 2.209540  | 0.045742  | 0.225019  |
| C | 1.822480  | 0.715985  | 1.388737  |
| C | 2.407155  | 1.946425  | 1.683471  |
| C | 3.748237  | 1.807887  | -0.329632 |
| C | 3.170573  | 0.576225  | -0.638466 |
| C | 3.364910  | 2.492663  | 0.825162  |
| H | 3.816849  | 3.452134  | 1.060410  |
| H | 4.500622  | 2.229154  | -0.990026 |
| H | 3.469533  | 0.020896  | -1.520785 |
| H | 1.092929  | 0.270985  | 2.056564  |
| H | 2.118353  | 2.476264  | 2.586542  |

1 imaginary frequency

E = -1260.275643

H = -1259.960817

G = -1260.024943

E<sub>M06-2X</sub> = -1260.143031

E<sub>solv</sub> = -1260.295858

## TS12-cis

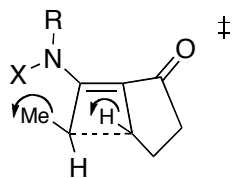

|   |           |           |           |
|---|-----------|-----------|-----------|
| C | 3.359195  | -0.037812 | -0.127109 |
| C | 4.044285  | 1.188905  | -0.713449 |
| C | 3.361235  | 2.363937  | 0.052552  |
| C | 2.048888  | 1.807169  | 0.658702  |
| C | 2.115498  | 0.360604  | 0.442699  |
| H | 3.847421  | 1.275450  | -1.790440 |
| H | 5.132210  | 1.177422  | -0.590090 |
| H | 3.142856  | 3.239944  | -0.565751 |
| H | 3.999521  | 2.703410  | 0.878022  |
| O | 1.163927  | 2.478272  | 1.167475  |
| C | 1.257968  | -0.705036 | 0.178376  |
| C | 1.940008  | -1.442767 | -0.857802 |
| H | 2.040632  | -0.918043 | -1.804460 |
| C | 2.028717  | -2.943689 | -0.947979 |
| H | 3.009117  | -3.233541 | -1.346110 |
| H | 1.263973  | -3.347471 | -1.620597 |
| H | 1.898833  | -3.415665 | 0.030944  |
| N | 0.142197  | -1.110462 | 0.914197  |
| C | -0.051653 | -0.494693 | 2.242325  |
| S | -1.306157 | -1.544849 | 0.080742  |
| H | -0.889167 | -0.985762 | 2.737559  |
| H | -0.214899 | 0.586260  | 2.169988  |
| H | 0.856331  | -0.677258 | 2.822453  |
| O | -0.891541 | -2.136732 | -1.190658 |
| O | -2.117809 | -2.280773 | 1.050190  |
| C | -2.135655 | 0.006388  | -0.277642 |
| C | -3.117204 | 0.475621  | 0.597731  |
| C | -3.735504 | 1.696239  | 0.326039  |
| C | -3.370537 | 2.430656  | -0.803886 |
| C | -2.391389 | 1.945497  | -1.674618 |
| C | -1.766425 | 0.726597  | -1.417114 |
| H | -1.019358 | 0.325816  | -2.093334 |
| H | -2.117270 | 2.514503  | -2.558239 |
| H | -3.853584 | 3.381652  | -1.009997 |
| H | -4.504250 | 2.070335  | 0.995955  |
| H | -3.400065 | -0.118185 | 1.460101  |
| H | 3.949652  | -0.839871 | 0.303736  |

1 imaginary frequency

E = -1260.281788

H = -1259.966984

G = -1260.031705

E<sub>M06-2X</sub> = -1260.148871

E<sub>solv</sub> = -1260.302379

## 12-trans

The starting point for optimization of this molecule was the conformation observed in the X-ray crystal structure of **12c-trans**.

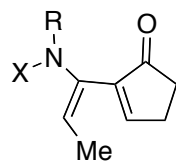

|   |           |           |           |
|---|-----------|-----------|-----------|
| C | 3.055389  | -1.007922 | 0.134196  |
| C | 2.132812  | -0.036867 | 0.270152  |
| C | 2.449058  | 1.072129  | -0.674076 |
| C | 3.743899  | 0.702695  | -1.406472 |
| C | 4.119858  | -0.697744 | -0.884702 |
| C | 0.930662  | -0.054657 | 1.133656  |
| C | 0.644315  | 0.914322  | 2.022850  |
| C | 1.502594  | 2.099245  | 2.353401  |
| O | 1.797141  | 2.086342  | -0.853904 |
| N | 0.104811  | -1.229148 | 1.005508  |
| C | -0.665405 | -1.672370 | 2.176476  |
| H | 0.009636  | -1.663304 | 3.035349  |
| S | -0.738143 | -1.409814 | -0.487058 |
| C | -2.003283 | -0.133401 | -0.490290 |
| C | -3.318500 | -0.486032 | -0.177080 |
| C | -4.301234 | 0.504503  | -0.170379 |
| C | -3.963582 | 1.826349  | -0.468384 |
| C | -2.643411 | 2.164486  | -0.776930 |
| C | -1.648650 | 1.186380  | -0.791894 |
| H | -4.731970 | 2.594782  | -0.464475 |
| O | -1.405690 | -2.711634 | -0.409816 |
| O | 0.211000  | -1.103577 | -1.556651 |
| H | -3.560950 | -1.522325 | 0.032178  |
| H | -5.329684 | 0.241150  | 0.060219  |
| H | -2.383747 | 3.192596  | -1.012430 |
| H | -0.622528 | 1.445829  | -1.032065 |
| H | -1.012543 | -2.689857 | 1.997333  |
| H | -1.532005 | -1.033936 | 2.401754  |
| H | 4.508329  | 1.458932  | -1.195362 |
| H | 3.562760  | 0.725397  | -2.485705 |
| H | 4.112282  | -1.453722 | -1.681214 |
| H | 5.122439  | -0.734893 | -0.438162 |
| H | 3.034522  | -1.949081 | 0.676564  |
| H | -0.285065 | 0.837847  | 2.582581  |
| H | 1.061836  | 3.021597  | 1.954333  |
| H | 2.510766  | 2.011936  | 1.942375  |
| H | 1.585795  | 2.222366  | 3.440905  |

0 imaginary frequencies

E = -1260.344986

H = -1260.028199

G = -1260.094237

E<sub>M06-2X</sub> = -1260.217847

E<sub>solv</sub> = -1260.365016

## 12-cis

The starting point for optimization of this molecule was the conformation observed in the X-ray crystal structure of **12c-cis**.

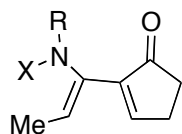

|   |           |           |           |
|---|-----------|-----------|-----------|
| C | 1.444267  | 1.742189  | 0.470668  |
| C | 2.094339  | 0.594200  | 0.172252  |
| C | 3.522511  | 0.930609  | -0.134850 |
| C | 3.688241  | 2.448748  | 0.004317  |
| C | 2.302033  | 2.977658  | 0.411848  |
| C | 1.517682  | -0.758656 | 0.165555  |
| C | 2.209868  | -1.848096 | -0.220632 |
| C | 1.720819  | -3.260069 | -0.261425 |
| O | 4.419211  | 0.166348  | -0.444599 |
| N | 0.159006  | -0.830844 | 0.653471  |
| C | -0.038926 | -1.044950 | 2.091699  |
| H | 0.106929  | -2.091533 | 2.384222  |
| S | -1.099455 | -1.310487 | -0.369478 |
| C | -2.275575 | 0.047154  | -0.248634 |
| C | -2.064066 | 1.198139  | -1.013493 |
| C | -2.974392 | 2.249429  | -0.919738 |
| C | -4.082943 | 2.146293  | -0.073673 |
| C | -4.290068 | 0.986534  | 0.674352  |
| C | -3.386335 | -0.074863 | 0.587597  |
| H | -4.790582 | 2.968038  | -0.006741 |
| O | -0.563519 | -1.323570 | -1.731292 |
| O | -1.758230 | -2.488654 | 0.211268  |
| H | -1.210556 | 1.253753  | -1.681247 |
| H | -2.824744 | 3.146024  | -1.514701 |
| H | -5.159401 | 0.900979  | 1.320121  |
| H | -3.544337 | -0.995261 | 1.139368  |
| H | -1.045860 | -0.733454 | 2.384230  |
| H | 0.679932  | -0.417619 | 2.625465  |
| H | 4.042744  | 2.857349  | -0.948202 |
| H | 4.467173  | 2.658545  | 0.745304  |
| H | 2.315948  | 3.493595  | 1.381812  |
| H | 1.898339  | 3.703243  | -0.307524 |
| H | 0.389787  | 1.787580  | 0.724333  |
| H | 3.228243  | -1.672066 | -0.555286 |
| H | 2.459552  | -3.929766 | 0.197079  |
| H | 1.602835  | -3.584616 | -1.303987 |
| H | 0.757801  | -3.400000 | 0.235038  |

0 imaginary frequencies

E = -1260.346014

H = -1260.029128

G = -1260.096424

E<sub>M06-2X</sub> = -1260.215589

E<sub>solv</sub> = -1260.367233

## TS16-syn

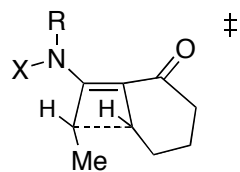

|   |           |           |           |
|---|-----------|-----------|-----------|
| C | -1.486529 | -1.830528 | 0.718794  |
| C | -1.771267 | -1.443611 | 2.152651  |
| H | -2.633422 | -1.989164 | 2.556197  |
| H | -0.904132 | -1.707223 | 2.773975  |
| H | -1.213217 | -2.885994 | 0.617525  |
| C | -0.955262 | -0.928313 | -0.262237 |
| C | -1.992049 | -0.028740 | -0.555216 |
| C | -3.164995 | -0.760304 | -0.194911 |
| H | -3.367828 | -1.698333 | -0.701439 |
| N | 0.218444  | -1.151448 | -0.979926 |
| C | 0.371520  | -0.567560 | -2.324635 |
| H | -0.515270 | -0.842173 | -2.902092 |
| H | 0.442086  | 0.523397  | -2.283439 |
| H | 1.248321  | -1.008315 | -2.798695 |
| S | 1.677684  | -1.504753 | -0.134063 |
| O | 1.287550  | -2.161982 | 1.113770  |
| O | 2.557544  | -2.155544 | -1.105364 |
| C | 2.388153  | 0.090445  | 0.277364  |
| C | 3.353236  | 0.645275  | -0.565627 |
| C | 3.882141  | 1.897793  | -0.252985 |
| C | 3.447048  | 2.578554  | 0.885526  |
| C | 2.485972  | 2.007718  | 1.723919  |
| C | 1.949549  | 0.756680  | 1.424845  |
| H | 1.217464  | 0.292457  | 2.076616  |
| H | 2.156844  | 2.534932  | 2.614700  |
| H | 3.861192  | 3.554258  | 1.123826  |
| H | 4.636935  | 2.338557  | -0.897795 |
| H | 3.692619  | 0.093318  | -1.435291 |
| C | -2.013937 | 1.397803  | -0.885706 |
| O | -1.043140 | 2.035639  | -1.285048 |
| C | -4.358998 | -0.051732 | 0.397224  |
| H | -4.640625 | -0.516970 | 1.354037  |
| H | -5.226543 | -0.195254 | -0.265881 |
| C | -3.373292 | 2.058118  | -0.638734 |
| H | -3.998096 | 1.919405  | -1.534396 |
| H | -3.207418 | 3.133833  | -0.525868 |
| H | -1.956610 | -0.370608 | 2.259098  |
| C | -4.080476 | 1.450825  | 0.587962  |
| H | -5.018679 | 1.981764  | 0.785056  |
| H | -3.446186 | 1.598848  | 1.472105  |

1 imaginary frequency

E = -1299.601526

H = -1299.256305

G = -1299.322777

E<sub>M06-2X</sub> = -1299.460995

E<sub>solv</sub> = -1299.622224

## TS16-anti

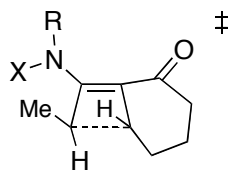

|   |           |           |           |
|---|-----------|-----------|-----------|
| C | 1.840487  | -0.888882 | -1.399101 |
| C | 2.292993  | -0.130833 | -0.315977 |
| C | 3.269664  | -0.613632 | 0.556799  |
| C | 3.796860  | -1.887181 | 0.341137  |
| C | 3.348059  | -2.659140 | -0.731902 |
| C | 2.375283  | -2.159670 | -1.601699 |
| S | 1.583317  | 1.493778  | -0.032124 |
| O | 2.481349  | 2.229749  | 0.859019  |
| N | 0.142593  | 1.216892  | 0.870820  |
| C | 0.336841  | 0.713795  | 2.244025  |
| C | -1.034684 | 0.886845  | 0.190550  |
| C | -1.692874 | 1.715708  | -0.778976 |
| C | -1.605845 | 3.216811  | -0.845439 |
| C | -1.961122 | -0.121520 | 0.484348  |
| C | -3.205999 | 0.464754  | 0.087551  |
| C | -4.295009 | -0.396545 | -0.516238 |
| C | -3.798620 | -1.833503 | -0.752306 |
| C | -3.051665 | -2.378147 | 0.479975  |
| O | 1.167514  | 2.033240  | -1.327007 |
| H | -4.669675 | 0.045225  | -1.450166 |
| H | -5.157223 | -0.408394 | 0.169542  |
| H | -3.121829 | -1.851960 | -1.617397 |
| H | -4.643330 | -2.485725 | -1.001408 |
| H | -1.951995 | 1.226697  | -1.713958 |
| H | -2.571327 | 3.631890  | -1.161161 |
| H | -0.852753 | 3.537638  | -1.573783 |
| H | -1.341578 | 3.650012  | 0.124339  |
| H | 1.204984  | 1.211562  | 2.676387  |
| H | 0.448669  | -0.374628 | 2.262288  |
| H | -0.549290 | 0.990993  | 2.820874  |
| H | 1.099202  | -0.478386 | -2.075833 |
| H | 2.035731  | -2.758602 | -2.441838 |
| H | 3.760764  | -3.650851 | -0.894827 |
| H | 4.560708  | -2.273152 | 1.009998  |
| H | 3.619214  | 0.008349  | 1.373602  |
| H | -3.543959 | 1.354228  | 0.610490  |
| C | -1.807644 | -1.544052 | 0.798899  |
| H | -3.718913 | -2.359912 | 1.355527  |
| H | -2.731239 | -3.415456 | 0.342578  |
| O | -0.779828 | -2.053873 | 1.237127  |

1 imaginary frequency

E = -1299.607332

H = -1299.262190

G = -1299.329407

E<sub>M06-2X</sub> = -1299.466469

E<sub>solv</sub> = -1299.628295



## 16-cis

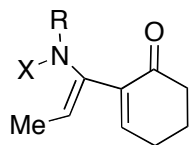

|   |           |           |           |
|---|-----------|-----------|-----------|
| C | 3.474660  | -0.248720 | 0.650389  |
| C | 2.409314  | -0.181083 | -0.249322 |
| C | 2.111347  | -1.246690 | -1.103702 |
| C | 2.884421  | -2.404913 | -1.037060 |
| C | 3.942850  | -2.491964 | -0.127834 |
| C | 4.239174  | -1.415697 | 0.710102  |
| S | 1.409442  | 1.314455  | -0.334742 |
| O | 2.199278  | 2.377518  | 0.301922  |
| N | 0.078432  | 0.969870  | 0.648483  |
| C | 0.265672  | 1.117371  | 2.096281  |
| C | -1.271343 | 1.062429  | 0.134326  |
| C | -1.793812 | 2.251164  | -0.225324 |
| C | -1.109701 | 3.581398  | -0.195362 |
| C | -2.001095 | -0.237037 | 0.093807  |
| C | -1.349329 | -1.398795 | 0.354499  |
| C | -1.957137 | -2.770973 | 0.394297  |
| C | -3.478820 | -2.732149 | 0.547912  |
| C | -4.061341 | -1.703162 | -0.421691 |
| O | 0.912025  | 1.440505  | -1.705489 |
| H | 0.229324  | 2.164983  | 2.417204  |
| H | 4.543655  | -3.396086 | -0.081671 |
| H | 1.300830  | -1.153385 | -1.819050 |
| H | 2.667287  | -3.236197 | -1.701988 |
| H | 5.072296  | -1.477799 | 1.404516  |
| H | 3.709179  | 0.609960  | 1.270206  |
| H | 1.223720  | 0.686731  | 2.401492  |
| H | -0.531994 | 0.559678  | 2.594228  |
| H | -3.915043 | -3.722213 | 0.372277  |
| H | -3.733585 | -2.448374 | 1.577724  |
| H | -1.492309 | -3.350078 | 1.203301  |
| H | -1.686986 | -3.301964 | -0.534589 |
| H | -0.281170 | -1.343940 | 0.546280  |
| H | -2.815991 | 2.243572  | -0.583678 |
| H | -1.769206 | 4.333088  | 0.256883  |
| H | -0.901848 | 3.917632  | -1.220047 |
| H | -0.159183 | 3.574366  | 0.343007  |
| C | -3.468036 | -0.309857 | -0.227996 |
| H | -3.845884 | -2.009283 | -1.457702 |
| H | -5.147332 | -1.607541 | -0.334106 |
| O | -4.184653 | 0.670547  | -0.371150 |

0 imaginary frequencies

E = -1299.656096

H = -1299.308617

G = -1299.377703

E<sub>H06-2X</sub> = -1299.518353

E<sub>solv</sub> = -1299.677819

## 16-trans

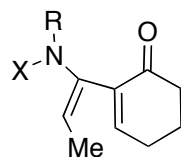

|   |           |           |           |
|---|-----------|-----------|-----------|
| C | -1.918976 | 1.203990  | -0.713282 |
| C | -2.225183 | -0.147209 | -0.516177 |
| C | -3.538186 | -0.580173 | -0.314000 |
| C | -4.568547 | 0.360661  | -0.314605 |
| C | -4.280016 | 1.713110  | -0.508606 |
| C | -2.961445 | 2.131307  | -0.705870 |
| S | -0.902093 | -1.364627 | -0.502474 |
| O | 0.072153  | -0.990782 | -1.528303 |
| N | -0.124372 | -1.191694 | 1.023923  |
| C | -0.943205 | -1.649285 | 2.155340  |
| C | 0.709856  | -0.030831 | 1.203476  |
| C | 0.425612  | 0.900796  | 2.130062  |
| C | 1.299713  | 2.058326  | 2.512647  |
| C | 1.945478  | -0.011904 | 0.363505  |
| C | 2.826773  | -1.032655 | 0.410528  |
| C | 4.084721  | -1.116437 | -0.404314 |
| C | 4.512427  | 0.249696  | -0.951707 |
| C | 3.311607  | 0.974344  | -1.568790 |
| O | -1.514907 | -2.695436 | -0.488728 |
| H | -0.301885 | -1.666447 | 3.039542  |
| H | -5.084996 | 2.443179  | -0.509459 |
| H | -3.739155 | -1.637571 | -0.180284 |
| H | -5.594897 | 0.035458  | -0.169242 |
| H | -2.739857 | 3.183566  | -0.859665 |
| H | -0.893625 | 1.525377  | -0.866051 |
| H | -1.295167 | -2.658670 | 1.942032  |
| H | -1.809364 | -1.003659 | 2.360061  |
| H | 4.921551  | 0.854733  | -0.131333 |
| H | 5.313147  | 0.134509  | -1.691098 |
| H | 3.905124  | -1.818397 | -1.235764 |
| H | 4.885098  | -1.568599 | 0.195744  |
| H | 2.603736  | -1.877842 | 1.060323  |
| H | -0.513708 | 0.820097  | 2.672401  |
| H | 0.900795  | 2.997200  | 2.108124  |
| H | 2.320222  | 1.946650  | 2.137589  |
| H | 1.345731  | 2.164739  | 3.603950  |
| H | 3.566686  | 1.972332  | -1.937674 |
| C | 2.148667  | 1.112804  | -0.597011 |
| H | 2.930144  | 0.398440  | -2.425967 |
| O | 1.393845  | 2.075163  | -0.649004 |

0 imaginary frequencies

E = -1299.659406

H = -1299.312227

G = -1299.380068

E<sub>M06-2X</sub> = -1299.524597

E<sub>solv</sub> = -1299.679712

## Complete Citation for Reference 11

M. J. Frisch, G. W. Trucks, H. B. Schlegel, G. E. Scuseria, M. A. Robb, J. R. Cheeseman, G. Scalmani, V. Barone, B. Mennucci, G. A. Petersson, H. Nakatsuji, M. Caricato, X. Li, H. P. Hratchian, A. F. Izmaylov, J. Bloino, G. Zheng, J. L. Sonnenberg, M. Hada, M. Ehara, K. Toyota, R. Fukuda, J. Hasegawa, M. Ishida, T. Nakajima, Y. Honda, O. Kitao, H. Nakai, T. Vreven, J. A. Montgomery, Jr., J. E. Peralta, F. Ogliaro, M. Bearpark, J. J. Heyd, E. Brothers, K. N. Kudin, V. N. Staroverov, T. Keith, R. Kobayashi, J. Normand, K. Raghavachari, A. Rendell, J. C. Burant, S. S. Iyengar, J. Tomasi, M. Cossi, N. Rega, J. M. Millam, M. Klene, J. E. Knox, J. B. Cross, V. Bakken, C. Adamo, J. Jaramillo, R. Gomperts, R. E. Stratmann, O. Yazyev, A. J. Austin, R. Cammi, C. Pomelli, J. W. Ochterski, R. L. Martin, K. Morokuma, V. G. Zakrzewski, G. A. Voth, P. Salvador, J. J. Dannenberg, S. Dapprich, A. D. Daniels, O. Farkas, J. B. Foresman, J. V. Ortiz, J. Cioslowski, and D. J. Fox, Gaussian 09, Revision D.01, Gaussian, Inc., Wallingford CT, 2013.
